# Supplementary material for: Five and six membered heterocyclic rings endowed with azobenzene as dual EGFRT790M and VEGFR-2 inhibitors: design, synthesis, in silico ADMET profile, molecular docking, dynamic simulation and anticancer evaluations
Source: Royal Society of Chemistry journal article supplement (doi:10.1039/d3ra06614b), 2023-01-01

# Five and six membered heterocyclic rings endowed with azobenzene as dual EGFR<sup>T790M</sup> and VEGFR-2 inhibitors:

## Design, synthesis, *in silico* ADMET profile, molecular docking, dynamic simulation and anticancer evaluations

Kurls E. Anwer<sup>1</sup>, Sanadelaslam S. A. El-Hddad<sup>2</sup>, Nour E. A. Abd El-Sattar<sup>1,3</sup>, Ahmed El-morsy<sup>4</sup>, Fathalla Khedr<sup>5</sup>, Samy Mohamady<sup>6</sup>, Doaa E. Keshek<sup>7,8</sup>, Samir A. Salama<sup>9</sup>, Khaled El-Adl<sup>5,10,\*</sup> and Noura S. Hanafy<sup>10</sup>

<sup>1</sup>Department of Chemistry, Faculty of Science, Ain Shams University, Abbassia, Cairo, Egypt

<sup>2</sup>Pharmaceutical Chemistry Department, Faculty of Pharmacy, Omar Al-mukhtar University, Libya

<sup>3</sup>Basic & Medical Sciences Department, Faculty of Dentistry, Alryada University for Science & Technology, Egypt

<sup>4</sup>Pharmaceutical Chemistry Department, College of Pharmacy, The Islamic University, Najaf, Iraq

<sup>5</sup>Pharmaceutical Medicinal Chemistry and Drug Design Department, Faculty of Pharmacy (Boys), Al-Azhar University, Nasr City 11884, Cairo, Egypt

<sup>6</sup>Pharmaceutical Chemistry Department, Faculty of Pharmacy, The British University in Egypt, Cairo, Egypt

<sup>7</sup>Department of biology, Jumum College University, Umm Al-Qura University, P.O Box7388, Makkah 21955, Sudia Arabia

<sup>8</sup>Agriculture Genetic Engineering Research Institute (AGERI), Agriculture Research Centre, Giza, Egypt.

<sup>9</sup> Division of Biochemistry, Department of Pharmacology, College of Pharmacy, Taif University, P.O. Box 11099, Taif 21944, Kingdom of Saudi Arabia.

<sup>10</sup>Pharmaceutical Chemistry Department, Faculty of Pharmacy, Heliopolis University for Sustainable Development, Cairo, Egypt

Corresponding Author:

Khaled El-Adl, [khaled.eladl@hu.edu.eg](mailto:khaled.eladl@hu.edu.eg); [eladlkhaled74@azhar.edu.eg](mailto:eladlkhaled74@azhar.edu.eg); [eladlkhaled74@yahoo.com](mailto:eladlkhaled74@yahoo.com)

## Docking studies

In the present work, all the target compounds were subjected to docking study to explore their binding mode towards VEGFR-2 and EGFR<sup>T790M</sup> receptors. All modeling experiments were performed using molsoft program, which provides a unique set of tools for the modeling of protein/ligand interactions. It predicts how small flexible molecule such as substrates or drug candidates bind to a protein of known 3D structure represented by grid interaction potentials ([http://www.molsoft.com/icm\\_pro.html](http://www.molsoft.com/icm_pro.html)). The experimental work used the biological target VEGFR-2 downloaded from the Brookhaven Protein Databank (<https://www.rcsb.org/structure/4ASD>). Also experiments used EGFR downloaded from the Brookhaven Protein Databank (<https://www.rcsb.org/structure/3W2O>). In order to qualify the docking results in terms of accuracy of the predicted binding conformations in comparison with the experimental procedure, the reported VEGFR-2 and EGFR inhibitors sorafenib and erlotinib were used as reference ligands respectively.

## Molecular dynamics simulation

The highly active derivatives **5**, **6**, **10** and **14** in the proteins VEGFR-2 and EGFR<sup>T790M</sup> were processed to a molecular dynamics study to address their binding affinity to the specific enzyme. Ligand force fields were generated using GAFF2 [50,51] and the force field AMBERff14SB for the protein [52]. The complex was solvated expanding 15.0 Å in each direction with TIP3P water box of octahedral truncated box neutralized to a salt concentration of 150 mM of NaCl. The system was prepared *via* multiple energy minimization and equilibration steps under gradual decline position restraints on the ligand and protein achieving 310 K of temperature and 1.0 bar of pressure followed by a restraint-free production run of 100 ns. The coordinates saved every 2 ns. The binding energy between the ligand and the receptor was determined by applying MM/GBSA approach on the trajectory using MM/PBSA.py script of Amber, the calculations were for the last 50 ns using snapshots of 1 ns intervals from the simulation trajectory.

## Biological testing

### *In vitro* anti-cancer activity

Cancer cells from different cancer cell lines hepatocellular carcinoma (HepG2), breast cancer (MCF-7), colorectal carcinoma (HCT-116) and lung cancer (A549) were purchased from American type Cell Culture collection (ATCC, Manassas, USA) and grown on the appropriate growth medium Roswell Park Memorial Institute medium (RPMI 1640) supplemented with 100 mg/ mL of streptomycin, 100 units/ mL of penicillin and 10% of heat-inactivated fetal bovine serum in a humidified, 5% (v/v) CO<sub>2</sub> atmosphere at 37 °C Cytotoxicity assay by 3-[4,5-dimethylthiazole-2-yl]-2,5-diphenyltetrazolium bromide (MTT).

Exponentially growing cells from different cancer cell lines were trypsinized, counted and seeded at the appropriate densities (2000-1000 cells/0.33 cm<sup>2</sup> well) into 96-well microtiter plates. Cells then were incubated in a humidified atmosphere at 37°C for 24 hours. Then, cells were exposed to different concentrations of compounds (0.1, 10, 100 and 1000 µM) for 72 hours. Then the viability of treated cells was determined using MTT technique as follow. Cells were incubated with 200 µl of 5% MTT solution/well (Sigma Aldrich, MO) and were allowed to metabolize the dye into colored-insoluble formazan crystals for 2 hours. The remaining MTT solution were discarded from the wells and the formazan crystals were dissolved in 200 µl/well acidified isopropanol for 30 min, covered with aluminum foil and with continuous shaking using a MaxQ 2000 plate shaker (Thermo Fisher Scientific Inc, MI) at room temperature. The colorimetric assay was measured and recorded at absorbance of 570 nm using a Stat FaxR 4200 plate reader (Awareness Technology, Inc., FL). The cell viability were expressed as percentage of control and the concentration that induces 50% of maximum inhibition of cell proliferation (IC<sub>50</sub>) were determined using Graph Pad Prism version 5 software (Graph Pad software Inc, CA) [[53-55](#)].

## **VEGFR-2 kinase inhibitory assay**

The kinase activity of VEGFR-2 was measured by use of an anti-phosphotyrosine antibody with the Alpha Screen system (PerkinElmer, USA) according to manufacturer's instructions [56]. Enzyme reactions were performed in 50 mM Tris-HCl pH 7.5, 5 mM MnCl<sub>2</sub>, 5 mM MgCl<sub>2</sub>, 0.01% Tween-20 and 2 mM DTT, containing 10 μM ATP, 0.1 μg/mL biotinylated poly-GluTyr (4:1) and 0.1 nM of VEGFR-2 (Millipore, UK). Prior to catalytic initiation with ATP, the tested compounds at final concentrations ranging from 0-300 μg/mL and enzyme were incubated for 5 min at room temperature. The reactions were quenched by the addition of 25 μL of 100 mM EDTA, 10 μg/mL Alpha Screen streptavidine donor beads and 10 μg/mL acceptor beads in 62.5 mM HEPES pH 7.4, 250 mM NaCl, and 0.1% BSA. Plate was incubated in the dark overnight and then read by ELISA Reader (PerkinElmer, USA). Wells containing the substrate and the enzyme without compounds were used as reaction control. Wells containing biotinylated poly-GluTyr (4:1) and enzyme without ATP were used as basal control. Percent inhibition was calculated by the comparison of compounds treated to control incubations. The concentration of the test compound causing 50% inhibition (IC<sub>50</sub>) was calculated from the concentration-inhibition response curve (triplicate determinations) and the data were compared with Sorafenib (Sigma-Aldrich, USA) as standard VEGFR-2 inhibitor.

## **EGFR<sup>T790M</sup> kinase inhibitory assay**

Homogeneous time resolved fluorescence (HTRF) assay was applied in this test [57]. EGFR<sup>T790M</sup> and ATP were purchased from Sigma. Firstly EGFR<sup>T790M</sup> and its substrates were incubated with the tested compounds in enzymatic buffer for 5 min. ATP (1.65 μM) was added into the reaction mixture to allow starting the enzymatic reaction. The assay was conducted for 30 min at room temperature. The reaction was stopped by addition of detection reagents which contain EDTA. The detection step continued for 1 h, and then the IC<sub>50</sub> values were determined by GraphPad Prism 5.0. Three independent experiments were performed for each concentration.

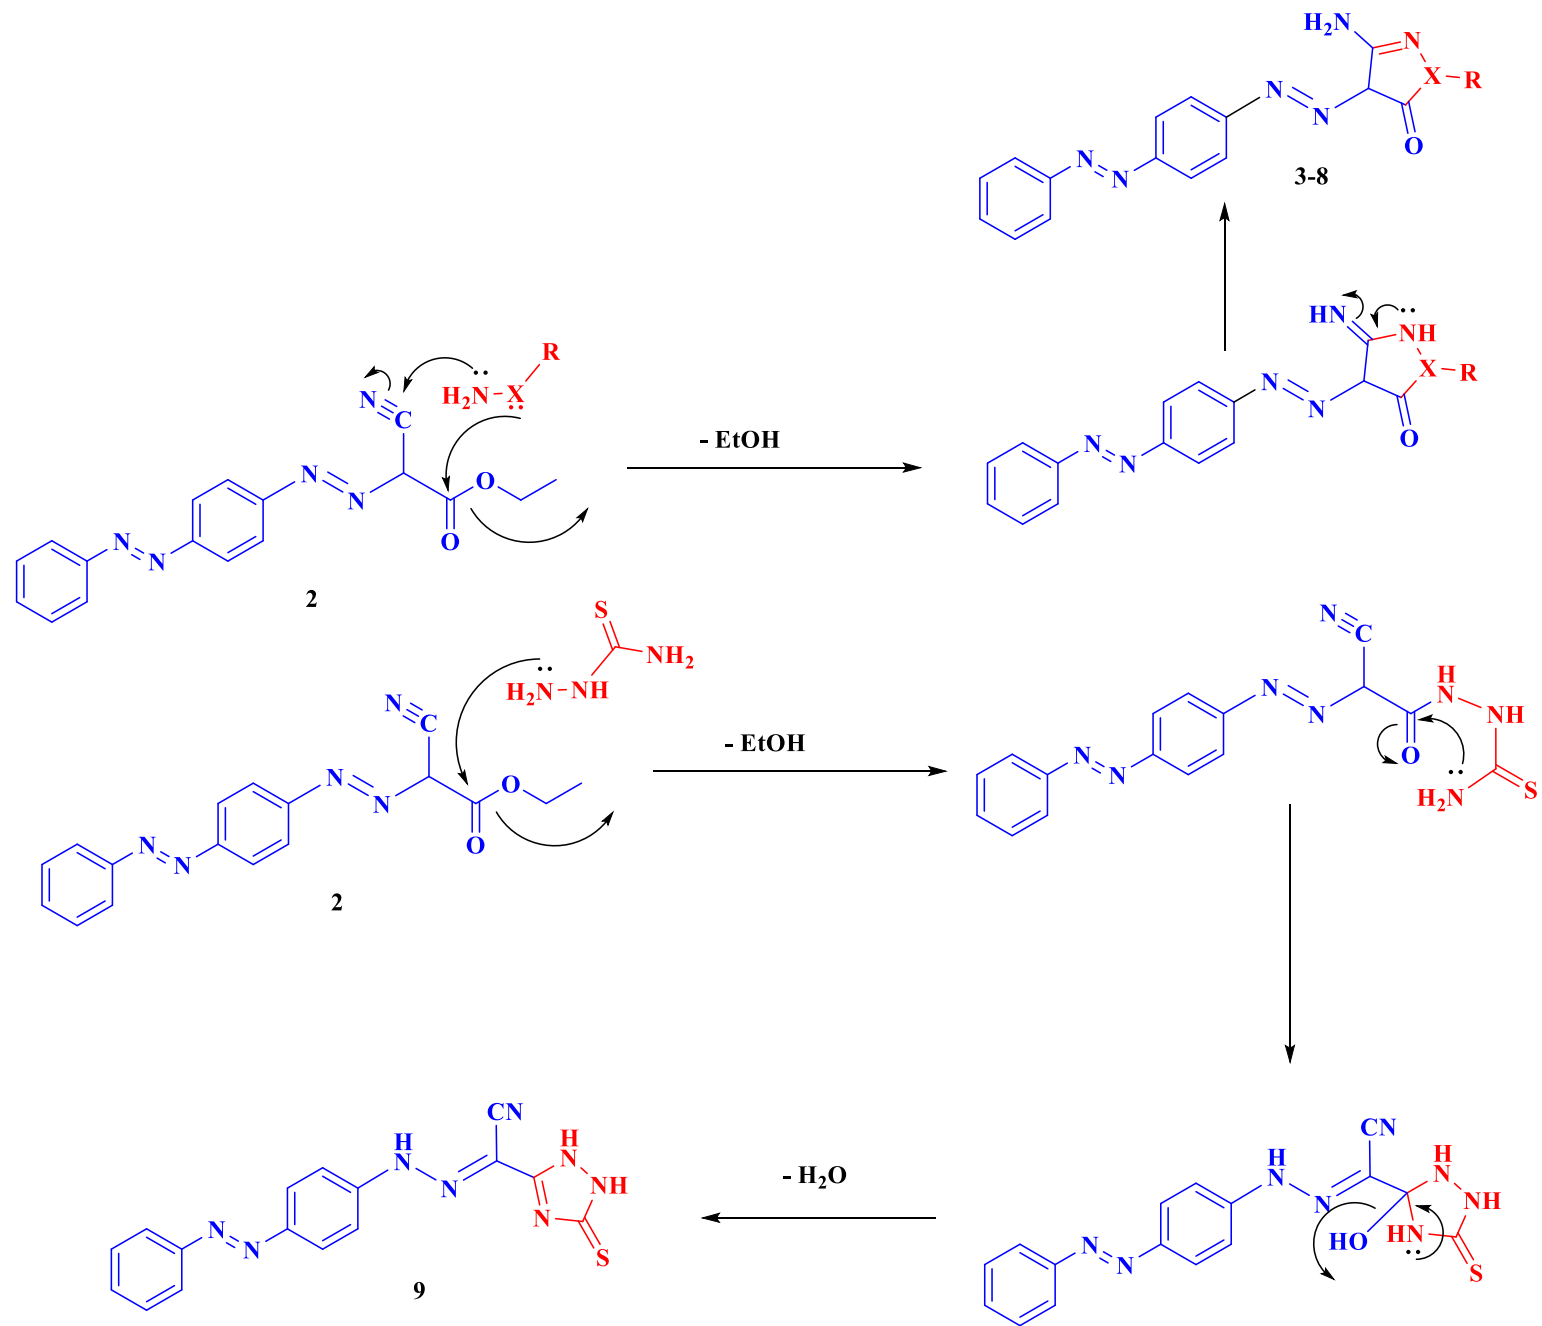

**Fig. 1:** The suggested pathway for formation of (6-9) derivatives.

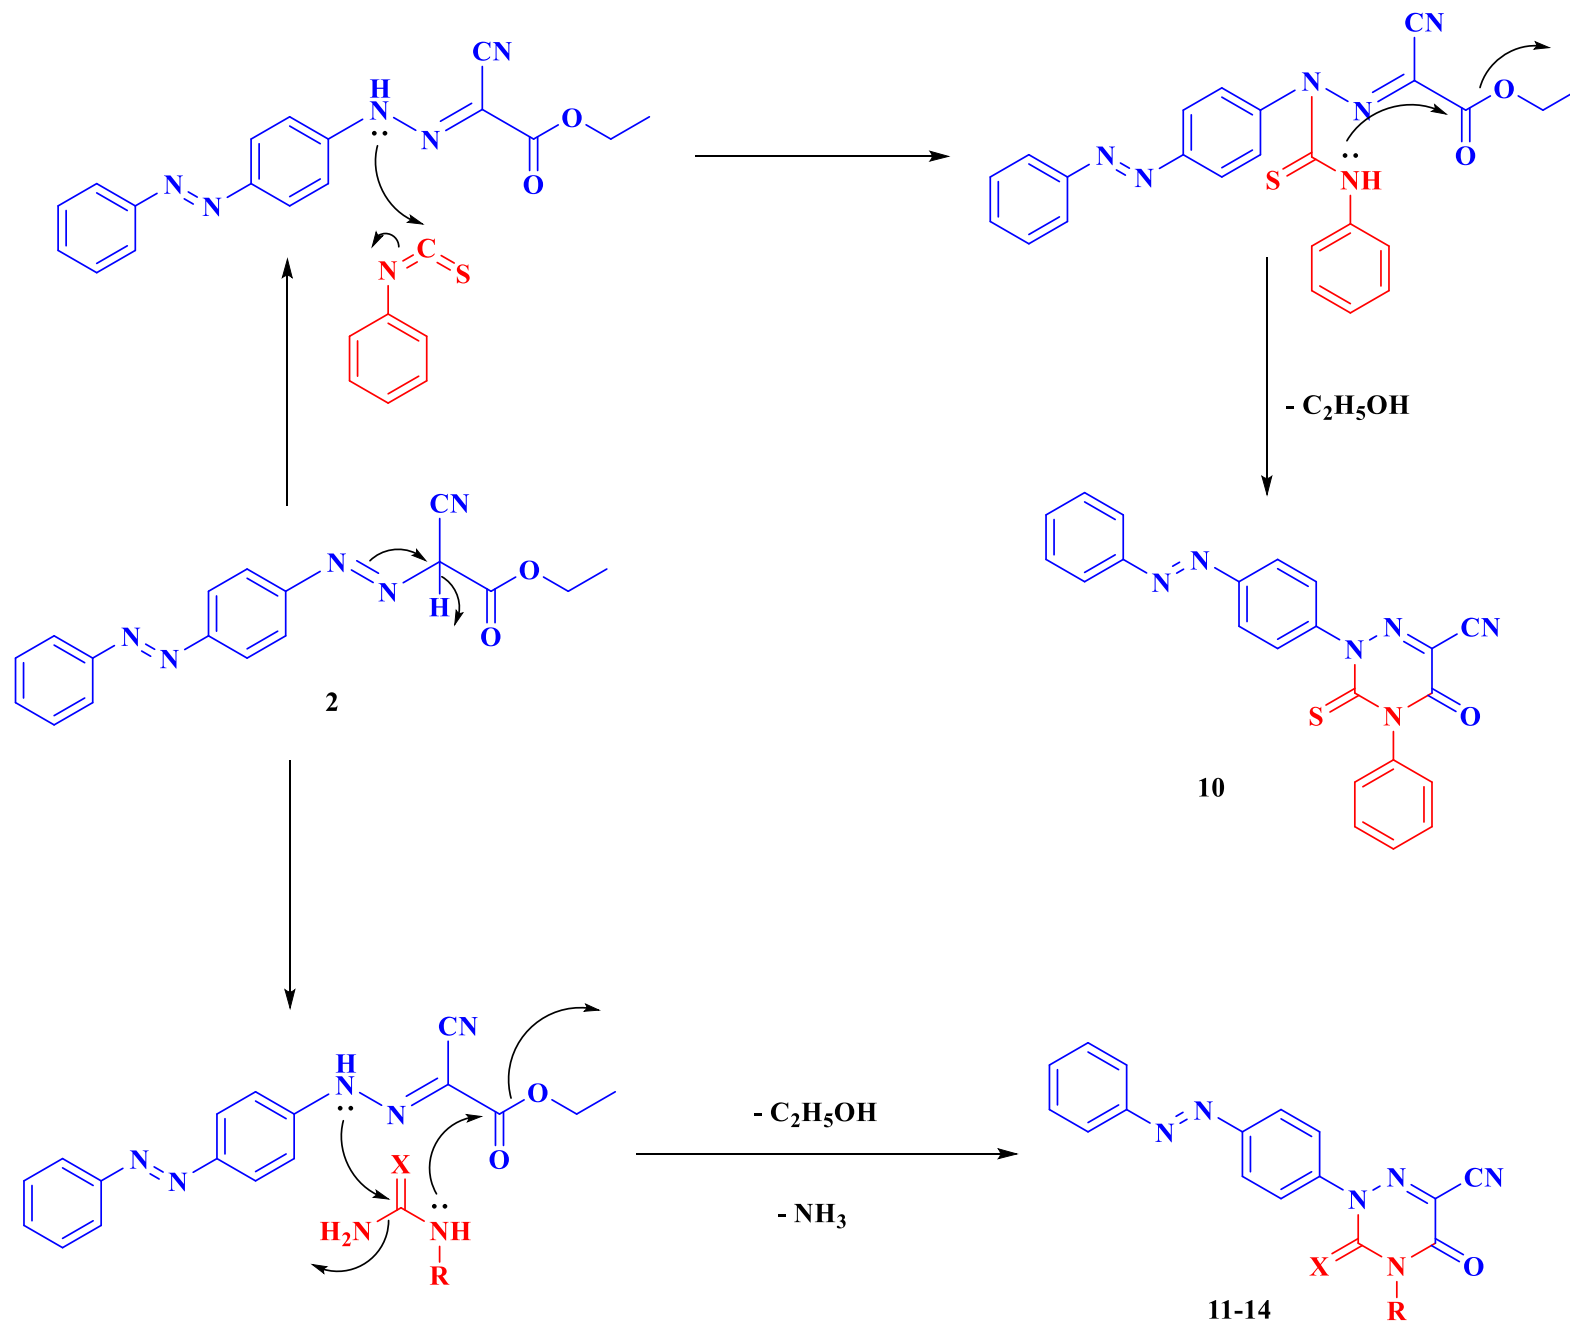

**Fig. 2:** The suggested pathway for syntheses of (10-14) derivatives.

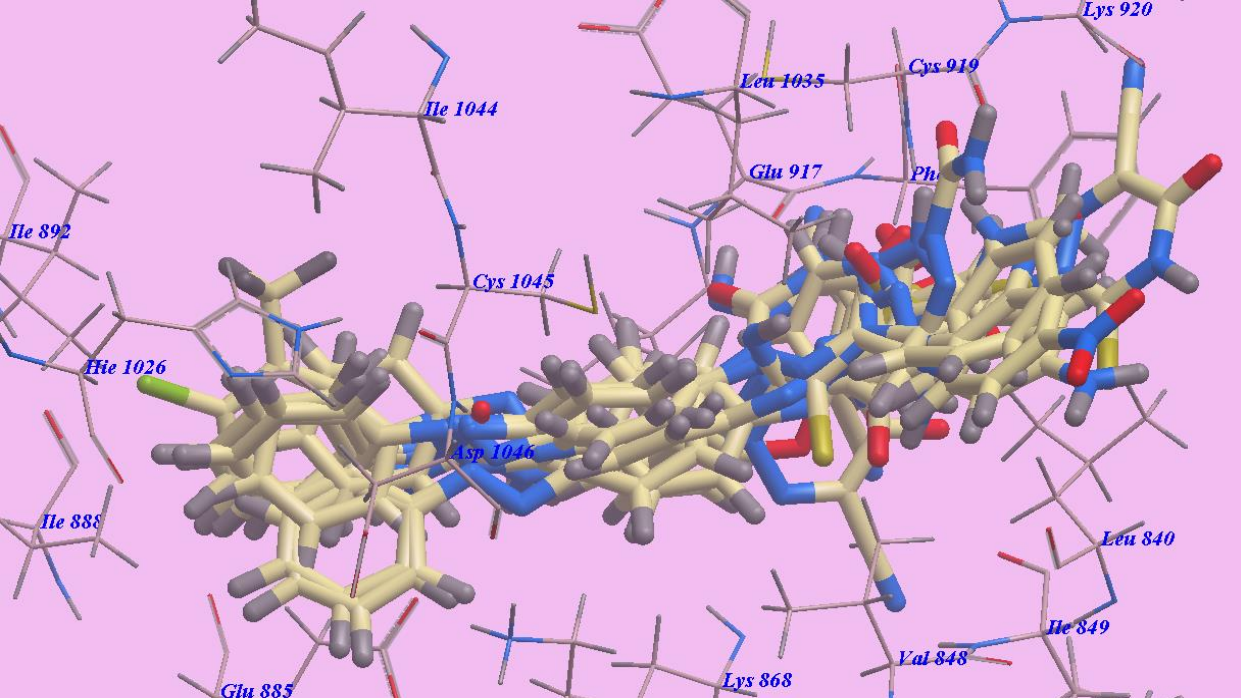

**Fig. 3:** A few docked compounds superimposed inside the 4ASD's binding space.

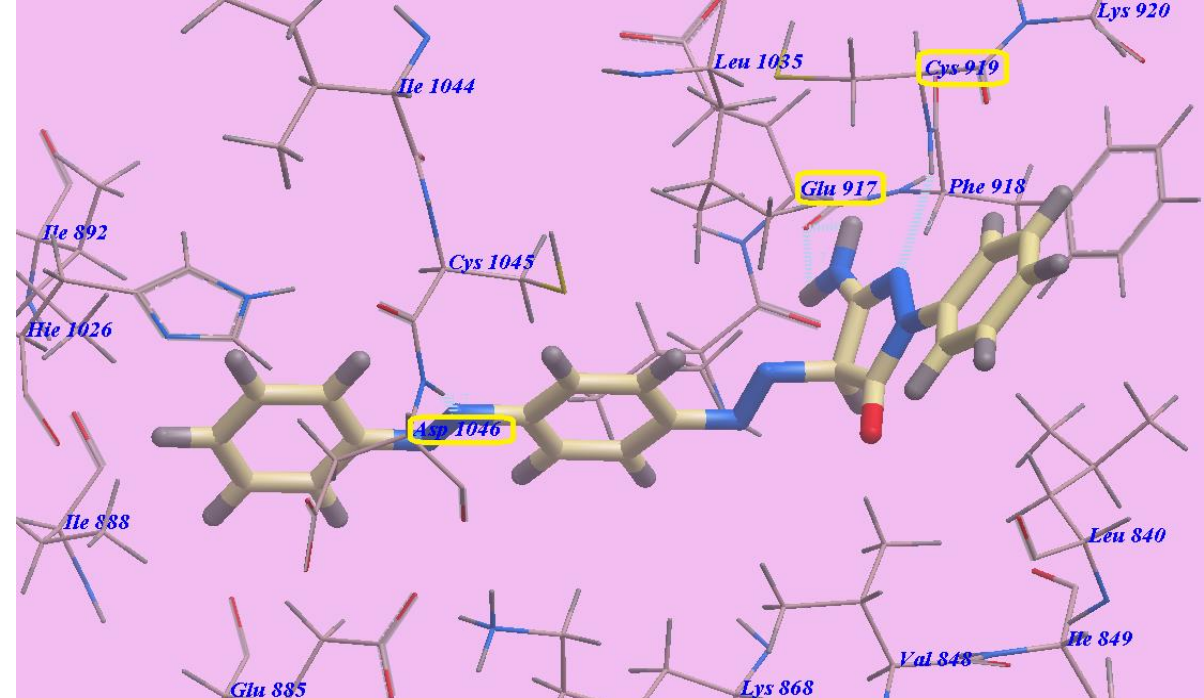

**Fig. 4:** Anticipated mode of binding for 5 with 4ASD.

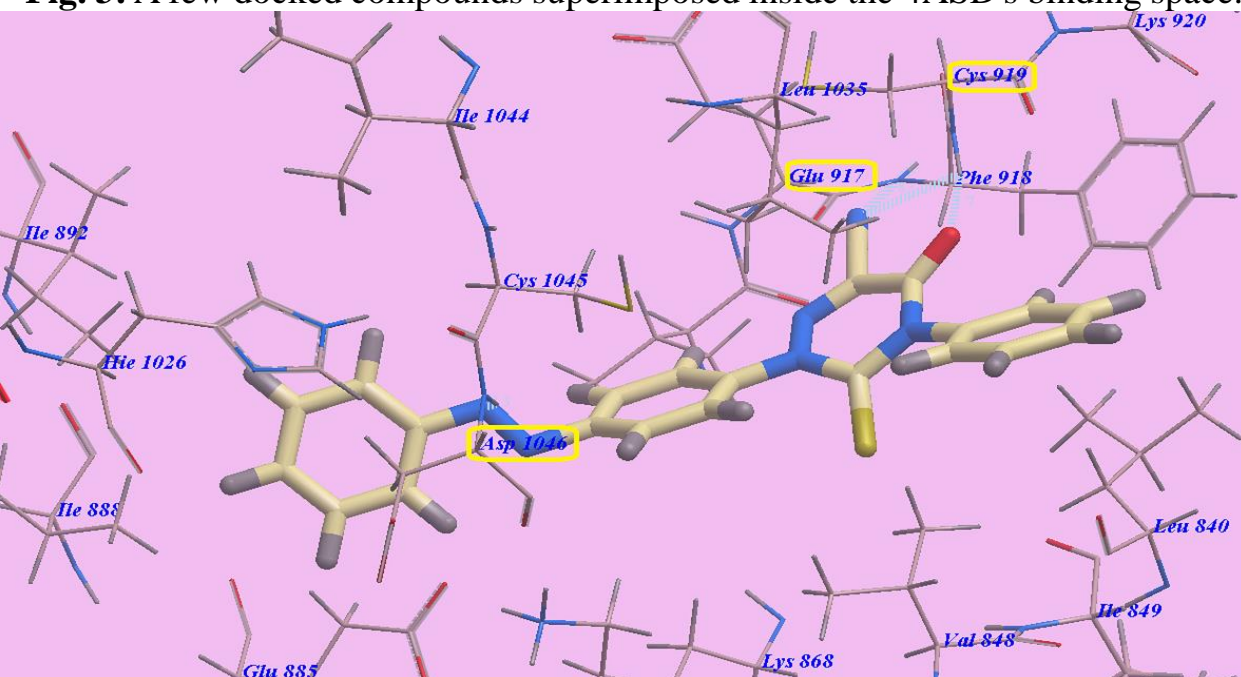

**Fig. 5:** Anticipated mode of binding for 10 with 4ASD.

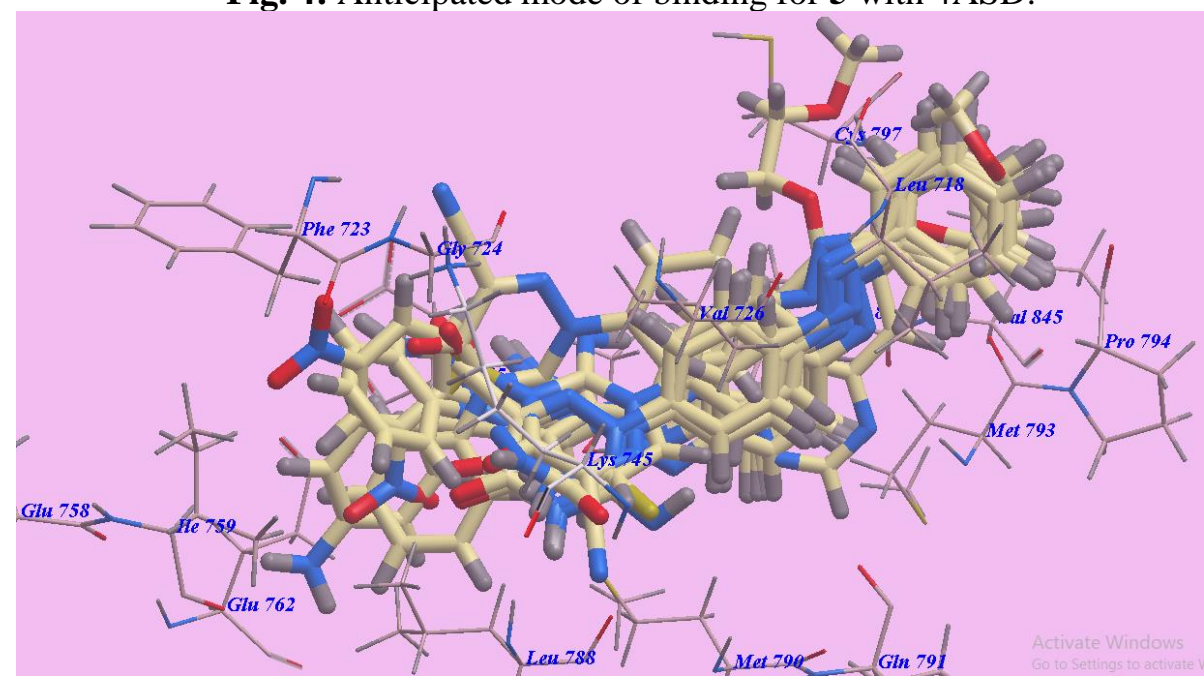

**Fig. 6:** A few docked compounds superimposed inside the 3W2O's binding space.

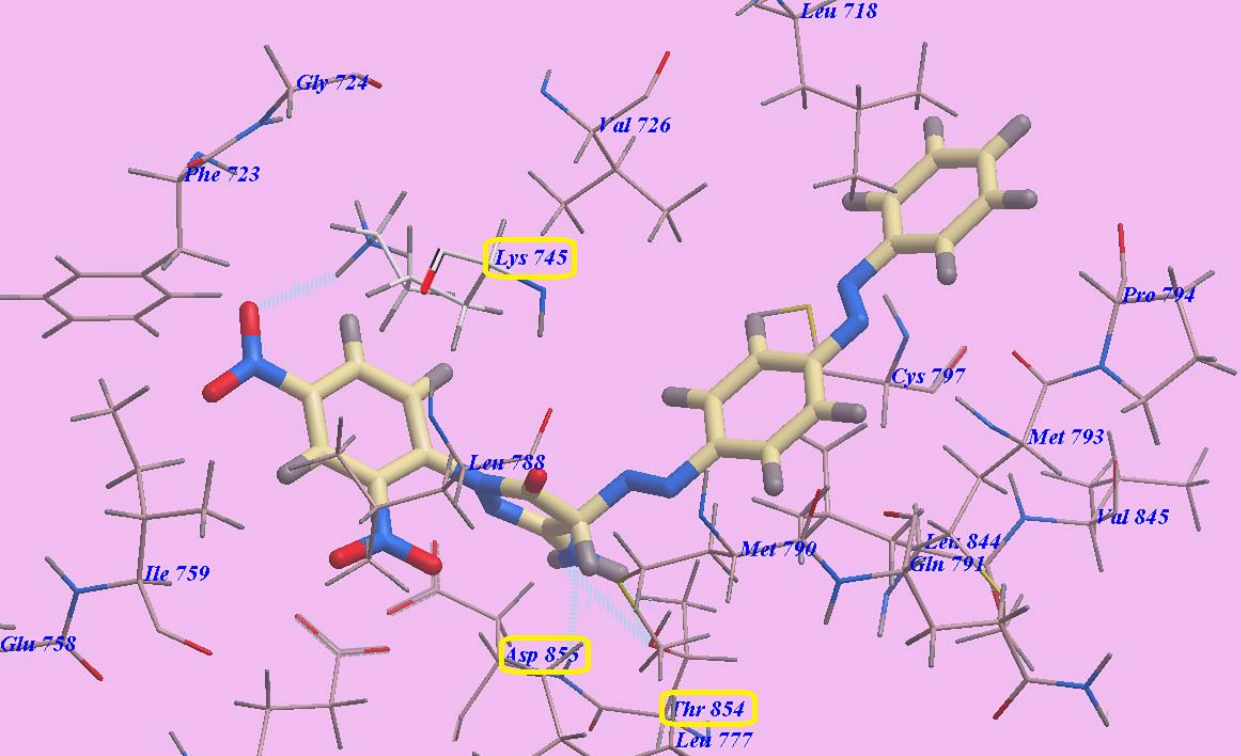

**Fig. 7:** Anticipated binding style for **6** with 3W2O.

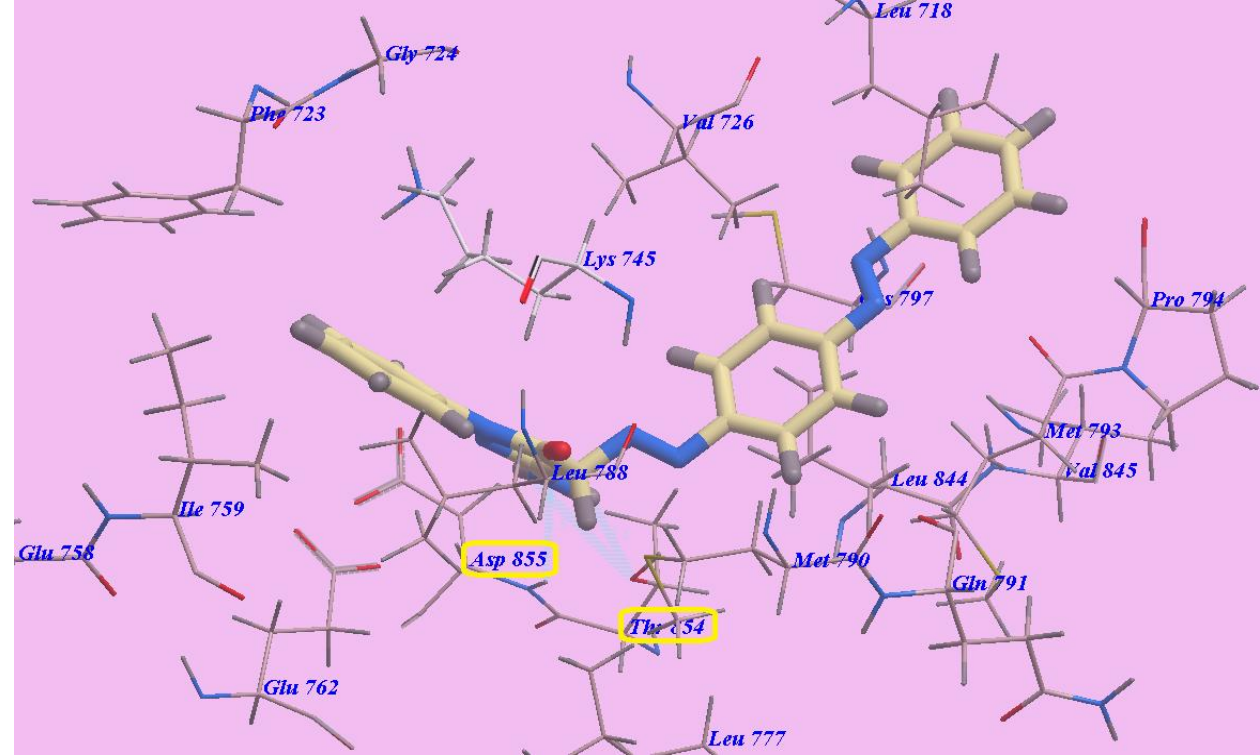

**Fig. 8:** Anticipated binding style for **5** with 3W2O.



## 1. Conventional and microwave methods comparison.

On the other hand, comparison between conventional and microwave methods by using different physical tools as YE (yield economy), AE (atomic economy), RME (reaction mass efficiency) and OE (optimum efficiency). The yields and times of compounds produced utilising microwave technology and conventional methods were compared and published [46-50]. However, in order to compare the differing efficiency of the same reaction in the microwave and traditional synthetic processes, we utilised the yield economy (YE) as an expression.

Calculation of YE was occurred through:  $YE = \frac{yield\%}{Reaction\ time\ "min"}$ . In this report, the YE was used to provide the obtained yields conclusively improved using the microwave and conventional conditions.

RME equation is:  $RME = \frac{Wt\ of\ isolated\ product}{Wt\ of\ reactants}$ . OE was utilised to compare the three reaction types directly, and it may be calculated through. Therefore, we may use the yield economy (YE) as a metric to improve the conversion efficiencies of these three various synthetic processes for the same reaction. While RME provides the actual mass efficiency, atomic economy (AE) indicated the reaction's theoretical maximum efficiency. Due to applying two distinct reaction conditions to produce the same target molecules, as presented in (**Table 1**), the AE of conventional and microwave processes have the same values.

**Table 1:** Comparing microwave and conventional techniques used in syntheses of our compounds 3-14

| Cpd. n | Time "min" |      | Yield % |      | YE    |        | OE    |       | RME   |       | AE    |
|--------|------------|------|---------|------|-------|--------|-------|-------|-------|-------|-------|
|        | M.W.       | Con. | M.W.    | Con. | M.W.  | Con.   | M.W.  | Con.  | M.W.  | Con.  |       |
| 3      | 1          | 180  | 90      | 56   | 90    | 0.3111 | 82.79 | 51.52 | 48.29 | 30.05 | 58.33 |
| 4      | 0.5        | 120  | 95      | 52   | 190   | 0.4333 | 87.13 | 47.69 | 52.55 | 28.76 | 60.31 |
| 5      | 1.5        | 240  | 92      | 55   | 61.33 | 0.2292 | 85.09 | 50.87 | 57.48 | 34.36 | 67.55 |
| 6      | 3          | 360  | 91      | 54   | 30.33 | 0.1500 | 83.39 | 49.48 | 60.03 | 35.62 | 71.99 |
| 7      | 2          | 360  | 94      | 57   | 47    | 0.1583 | 86.99 | 52.75 | 53.41 | 32.39 | 61.40 |
| 9      | 4          | 360  | 94      | 53   | 23.50 | 0.1472 | 86.76 | 48.92 | 54.89 | 30.95 | 63.27 |
| 10     | 3          | 300  | 91      | 51   | 30.33 | 0.1700 | 76.28 | 42.75 | 68.58 | 38.44 | 89.91 |
| 11     | 3.5        | 480  | 90      | 50   | 25.71 | 0.1042 | 73.67 | 40.92 | 61.98 | 34.43 | 84.13 |
| 12     | 3.5        | 540  | 93      | 52   | 26.57 | 0.0963 | 75.56 | 42.25 | 63.06 | 35.26 | 83.46 |
| 13     | 4          | 540  | 93      | 54   | 23.25 | 0.1000 | 76.76 | 44.57 | 58.49 | 33.96 | 76.20 |
| 14     | 5          | 720  | 90      | 51   | 18    | 0.0708 | 77.30 | 43.80 | 68.19 | 38.64 | 88.22 |

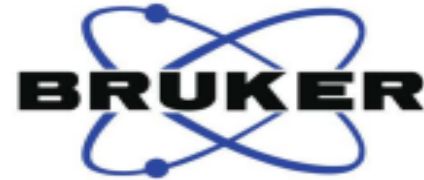

Current Data Parameters  
NAME nour eldin-PA2  
EXPNO 1  
PROCNO 1

F2 - Acquisition Parameters  
Date\_ 20230313  
Time 16.01  
INSTRUM spect  
PROBHD 5 mm PABBO BB/  
PULPROG zg30  
TD 65536  
SOLVENT DMSO  
NS 67  
DS 2  
SWH 8012.820 Hz  
FIDRES 0.122266 Hz  
AQ 4.0894465 sec  
RG 205.37  
DW 62.400 usec  
DE 6.50 usec  
TE 300.0 K  
D1 1.00000000 sec  
TDO 1

===== CHANNEL f1 =====  
SFO1 400.1524711 MHz  
NUC1 1H  
P1 12.00 usec  
PLW1 18.00000000 W

F2 - Processing parameters  
SI 65536  
SF 400.1500000 MHz  
WDW EM  
SSB 0  
LB 0.30 Hz  
GB 0  
PC 1.00

7.843  
7.837  
7.830  
7.825  
7.808  
7.581  
7.563  
7.544  
7.505  
7.487  
7.469  
7.452  
7.430  
4.170  
4.152  
4.134  
4.117  
3.553  
2.512  
2.507  
2.503  
1.852  
1.259  
1.242  
1.224

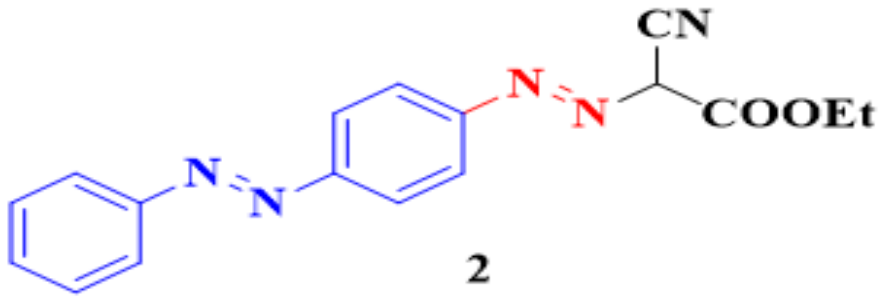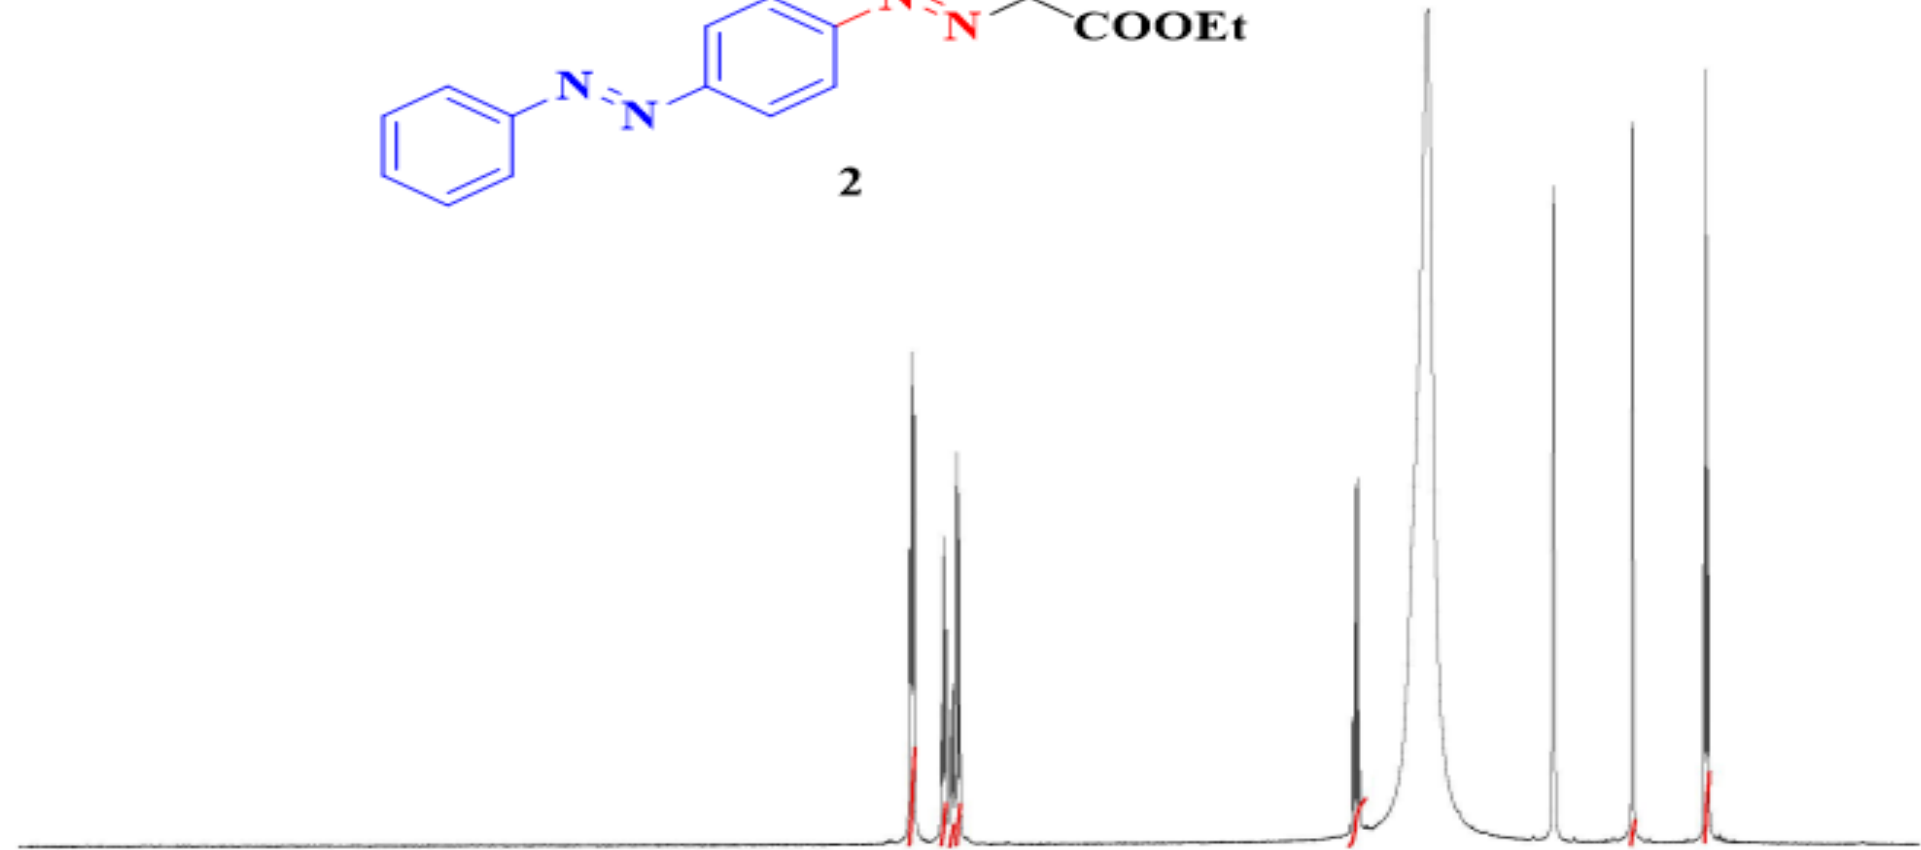

15 14 13 12 11 10 9 8 7 6 5 4 3 2 1 ppm

4.13  
2.13  
1.00  
2.10  
2.13  
1.00  
3.19

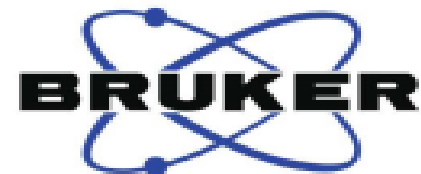

Current Data Parameters  
NAME neur eldin-PA2  
EXPNO 2  
PROCNO 1

F2 - Acquisition Parameters  
Date\_ 20230314  
Time 11.08  
INSTRUM spect  
PROBHD 5 mm FASBO BB/  
PULPROG zgpg30  
ID 65536  
SOLVENT DMSO  
NS 903  
DS 4  
SWH 24038.461 Hz  
FIDRES 0.366798 Hz  
AQ 1.3631488 sec  
RG 205.37  
DW 20.800 usec  
DE 6.50 usec  
TE 300.0 K  
D1 2.00000000 sec  
D11 0.03000000 sec  
ID0 1

----- CHANNEL f1 -----  
SFO1 100.6278588 MHz  
NUC1 13C  
P1 10.00 usec  
PLW1 47.00000000 W

----- CHANNEL f2 -----  
SFO2 400.1516006 MHz  
NUC2 1H  
CPDPRG(2) waltz16  
PCPD2 90.00 usec  
PLW2 18.00000000 W  
PLW12 0.34722000 W  
PLW13 0.28125000 W

F2 - Processing parameters  
SI 32768  
SF 100.6177975 MHz  
WDW EM  
SSB 0  
LB 1.00 Hz  
GB 0  
PC 1.40

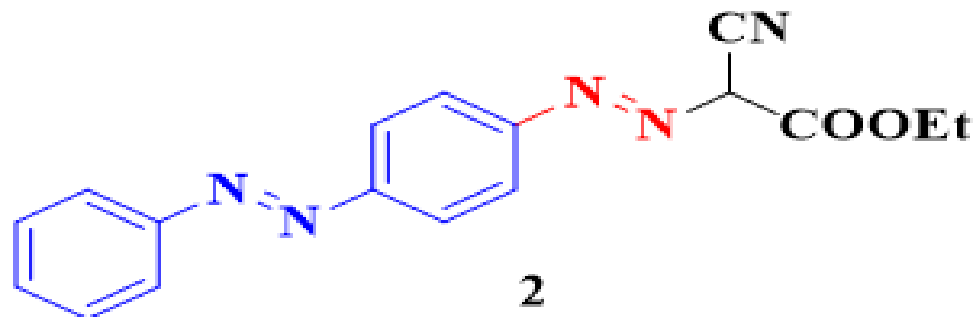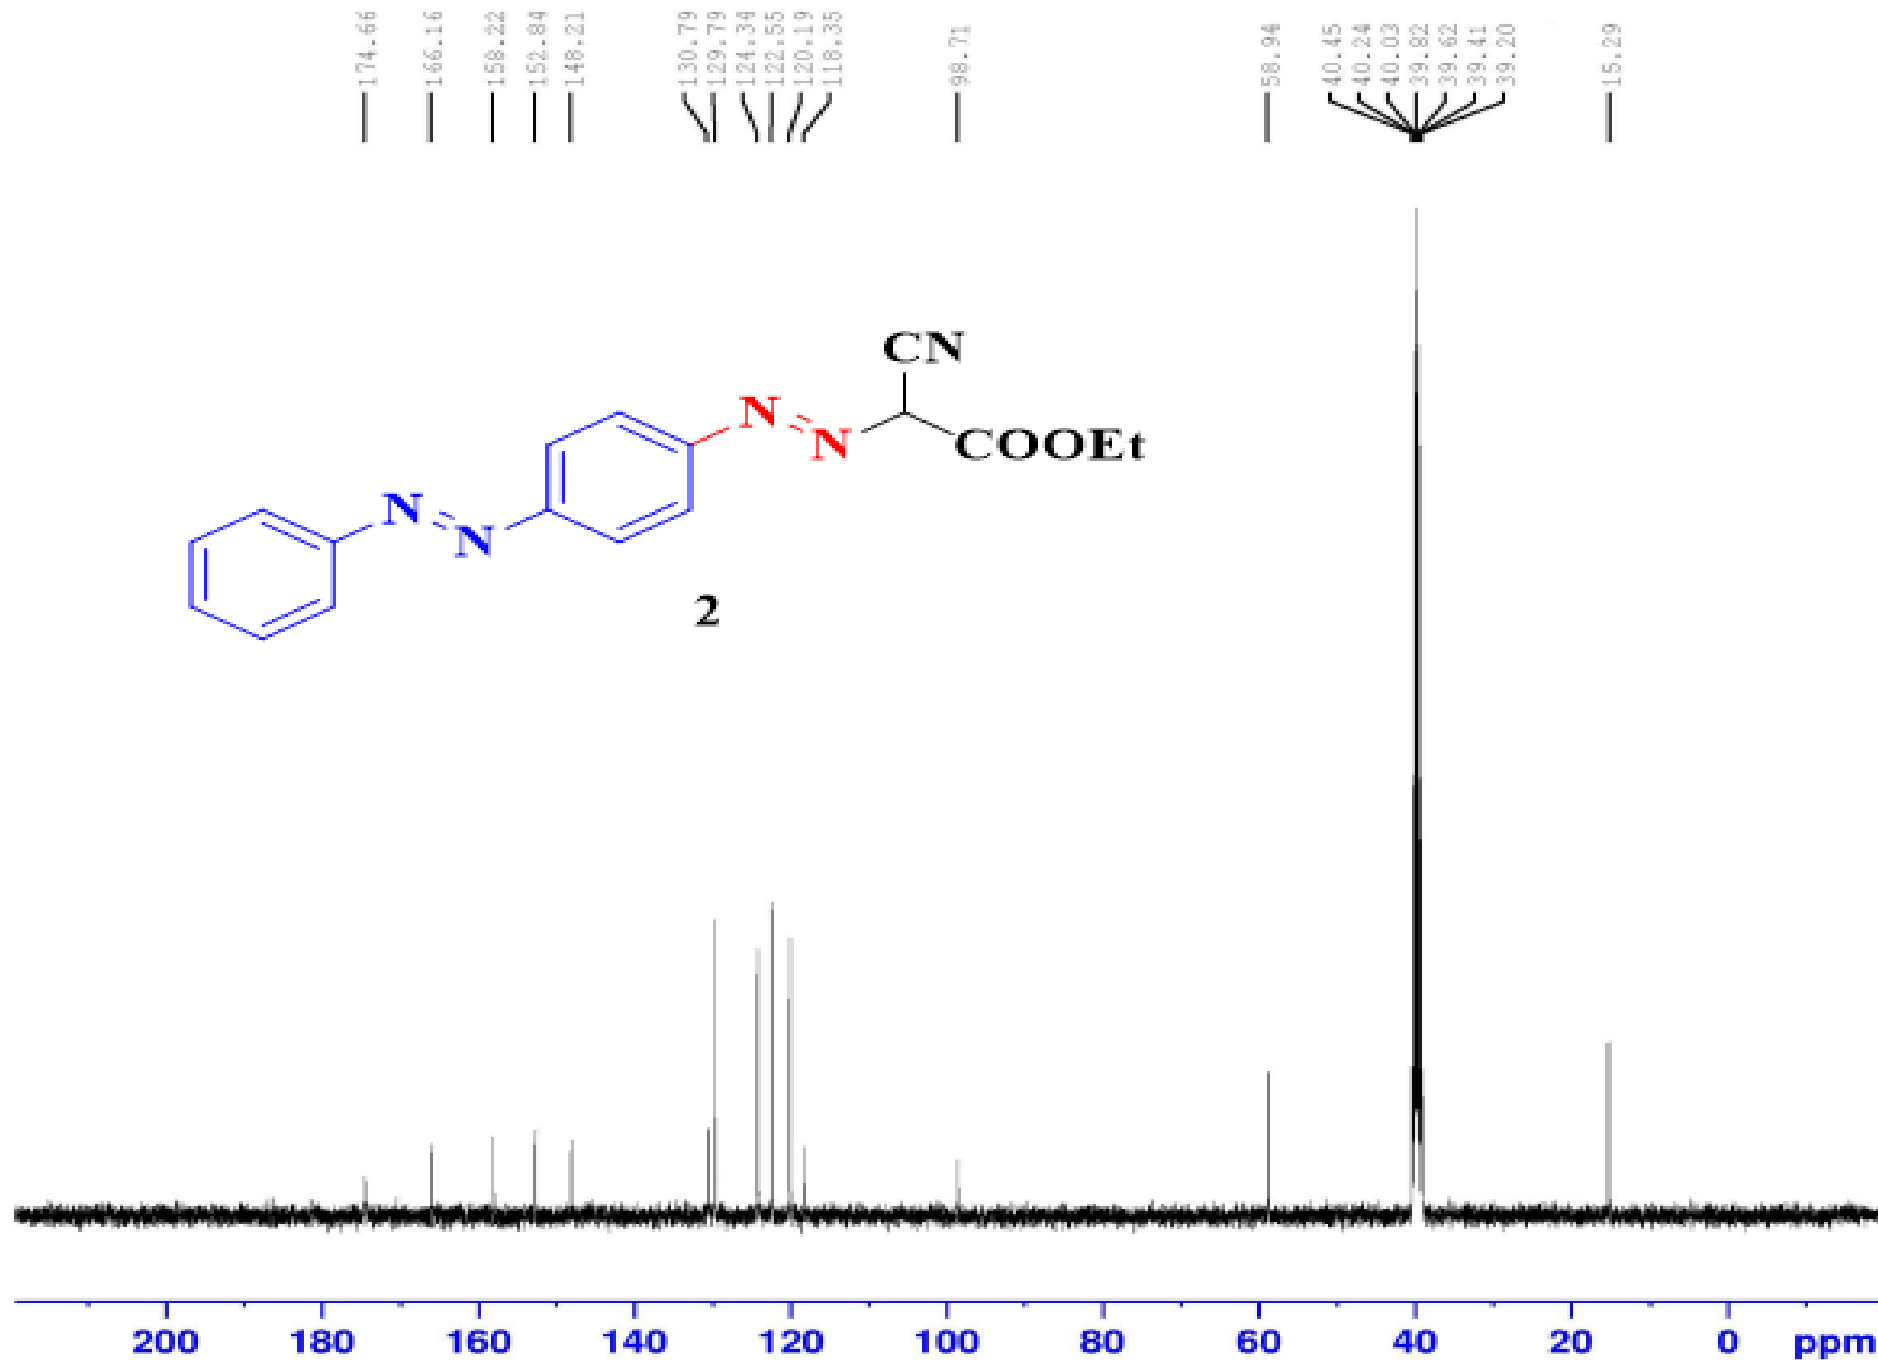

15.953

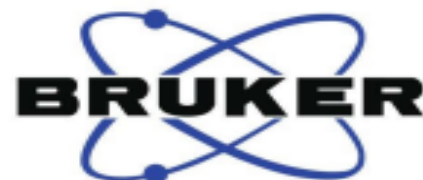

Current Data Parameters  
 NAME      nour eldin-PA26  
 EXPNO     1  
 PROCNO    1

F2 - Acquisition Parameters  
 Date\_     20230313  
 Time      16.28  
 INSTRUM   spect  
 PROBHD    5 mm PABBO BB/  
 PULPROG   zg30  
 TD         65536  
 SOLVENT   DMSO  
 NS         128  
 DS         2  
 SWH        8012.820 Hz  
 FIDRES     0.122266 Hz  
 AQ         4.0894465 sec  
 RG         205.37  
 DW         62.400 usec  
 DE         6.50 usec  
 TE         300.0 K  
 D1         1.00000000 sec  
 TDO        1

----- CHANNEL f1 -----  
 SFO1       400.1524711 MHz  
 NUC1       1H  
 P1         12.00 usec  
 PLW1       18.00000000 W

F2 - Processing parameters  
 SI         65536  
 SF         400.1500000 MHz  
 WDW       EM  
 SSB        0  
 LB         0.30 Hz  
 GB         0  
 PC         1.00

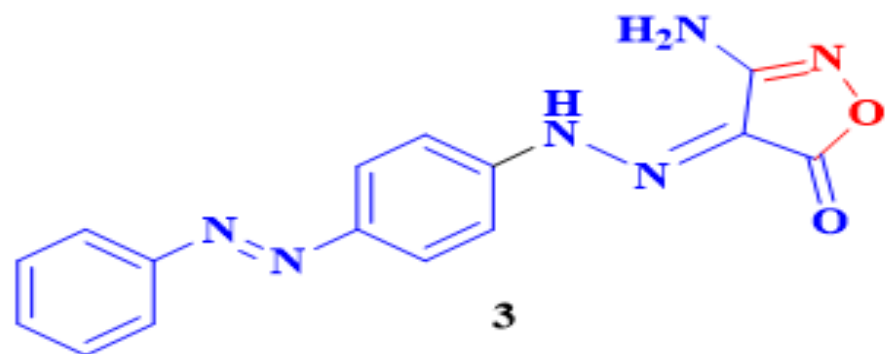

8.596  
7.932  
7.910  
7.860  
7.747  
7.725  
7.610  
7.590  
7.573  
7.552  
7.534  
7.514

3.359  
2.507

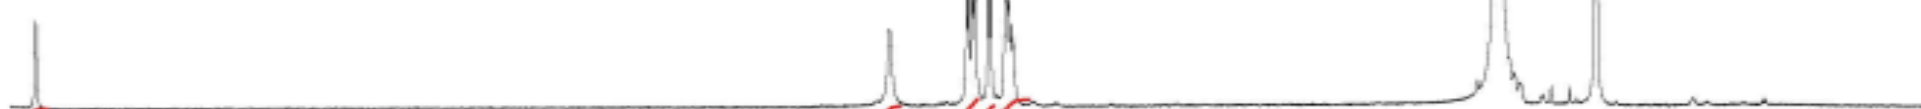

15 14 13 12 11 10 9 8 7 6 5 4 3 2 1 ppm

1.08  
2.00  
4.09  
1.54  
4.04

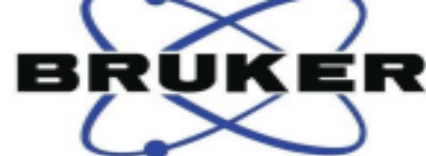

Current Data Parameters  
NAME       nour eldin-PA26  
EXPNO       2  
PROCNO      1

F2 - Acquisition Parameters  
Date\_       20231106  
Time        11.16  
INSTRUM     spect  
PROBHD      5 mm PABBO BB/  
PULPROG     zgpg30  
TD           65566  
SOLVENT     DMSO  
NS           1500  
DS           4  
SWH          24038.461 Hz  
FIDRES      0.366798 Hz  
AQ           1.3631488 sec  
RG           211.37  
DW           20.800 usec  
DE           6.50 usec  
TE           300.0 K  
D1           2.0000000 sec  
D11          0.0300000 sec  
TD0          1

----- CHANNEL f1 -----  
SFO1        100.6278588 MHz  
NUC1        13C  
P1           10.00 usec  
PLW1        47.00000000 W

----- CHANNEL f2 -----  
SFO2        400.1516006 MHz  
NUC2        1H  
CPDPRG[2     waltz16  
PCPD2        90.00 usec  
PLW2        18.00000000 W  
PLW12        0.34722000 W  
PLW13        0.28125000 W

F2 - Processing parameters  
SI           32768  
SF           100.6177975 MHz  
WDW          EM  
SSB          0  
LB           1.00 Hz  
GB          0  
PC           1.40

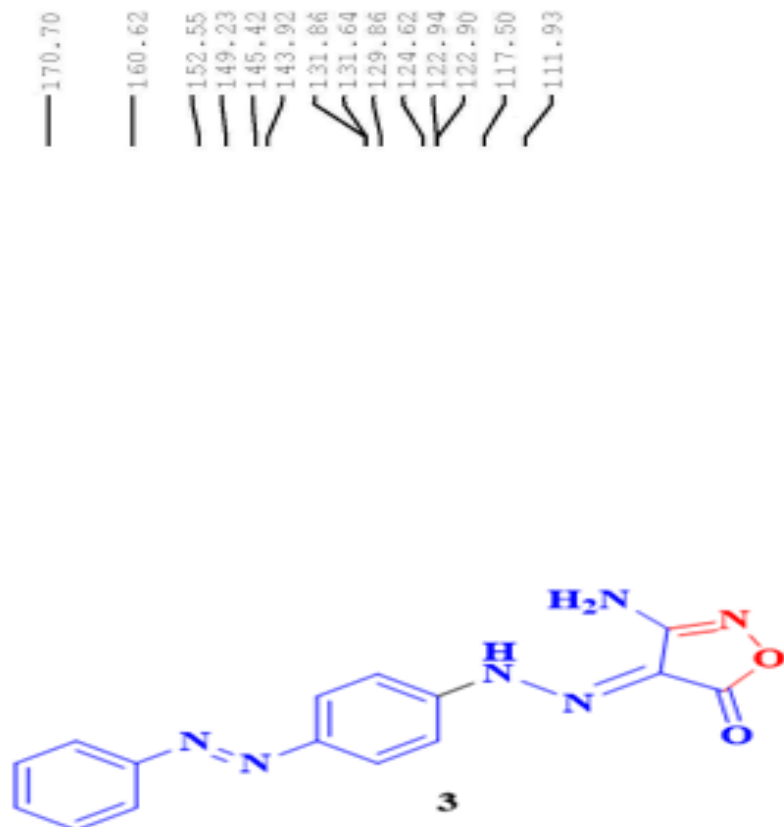

170.70  
160.62  
152.55  
149.23  
145.42  
143.92  
131.86  
131.64  
129.86  
124.62  
122.94  
122.90  
117.50  
111.93

40.61  
40.40  
40.19  
39.98  
39.77  
39.56  
39.36

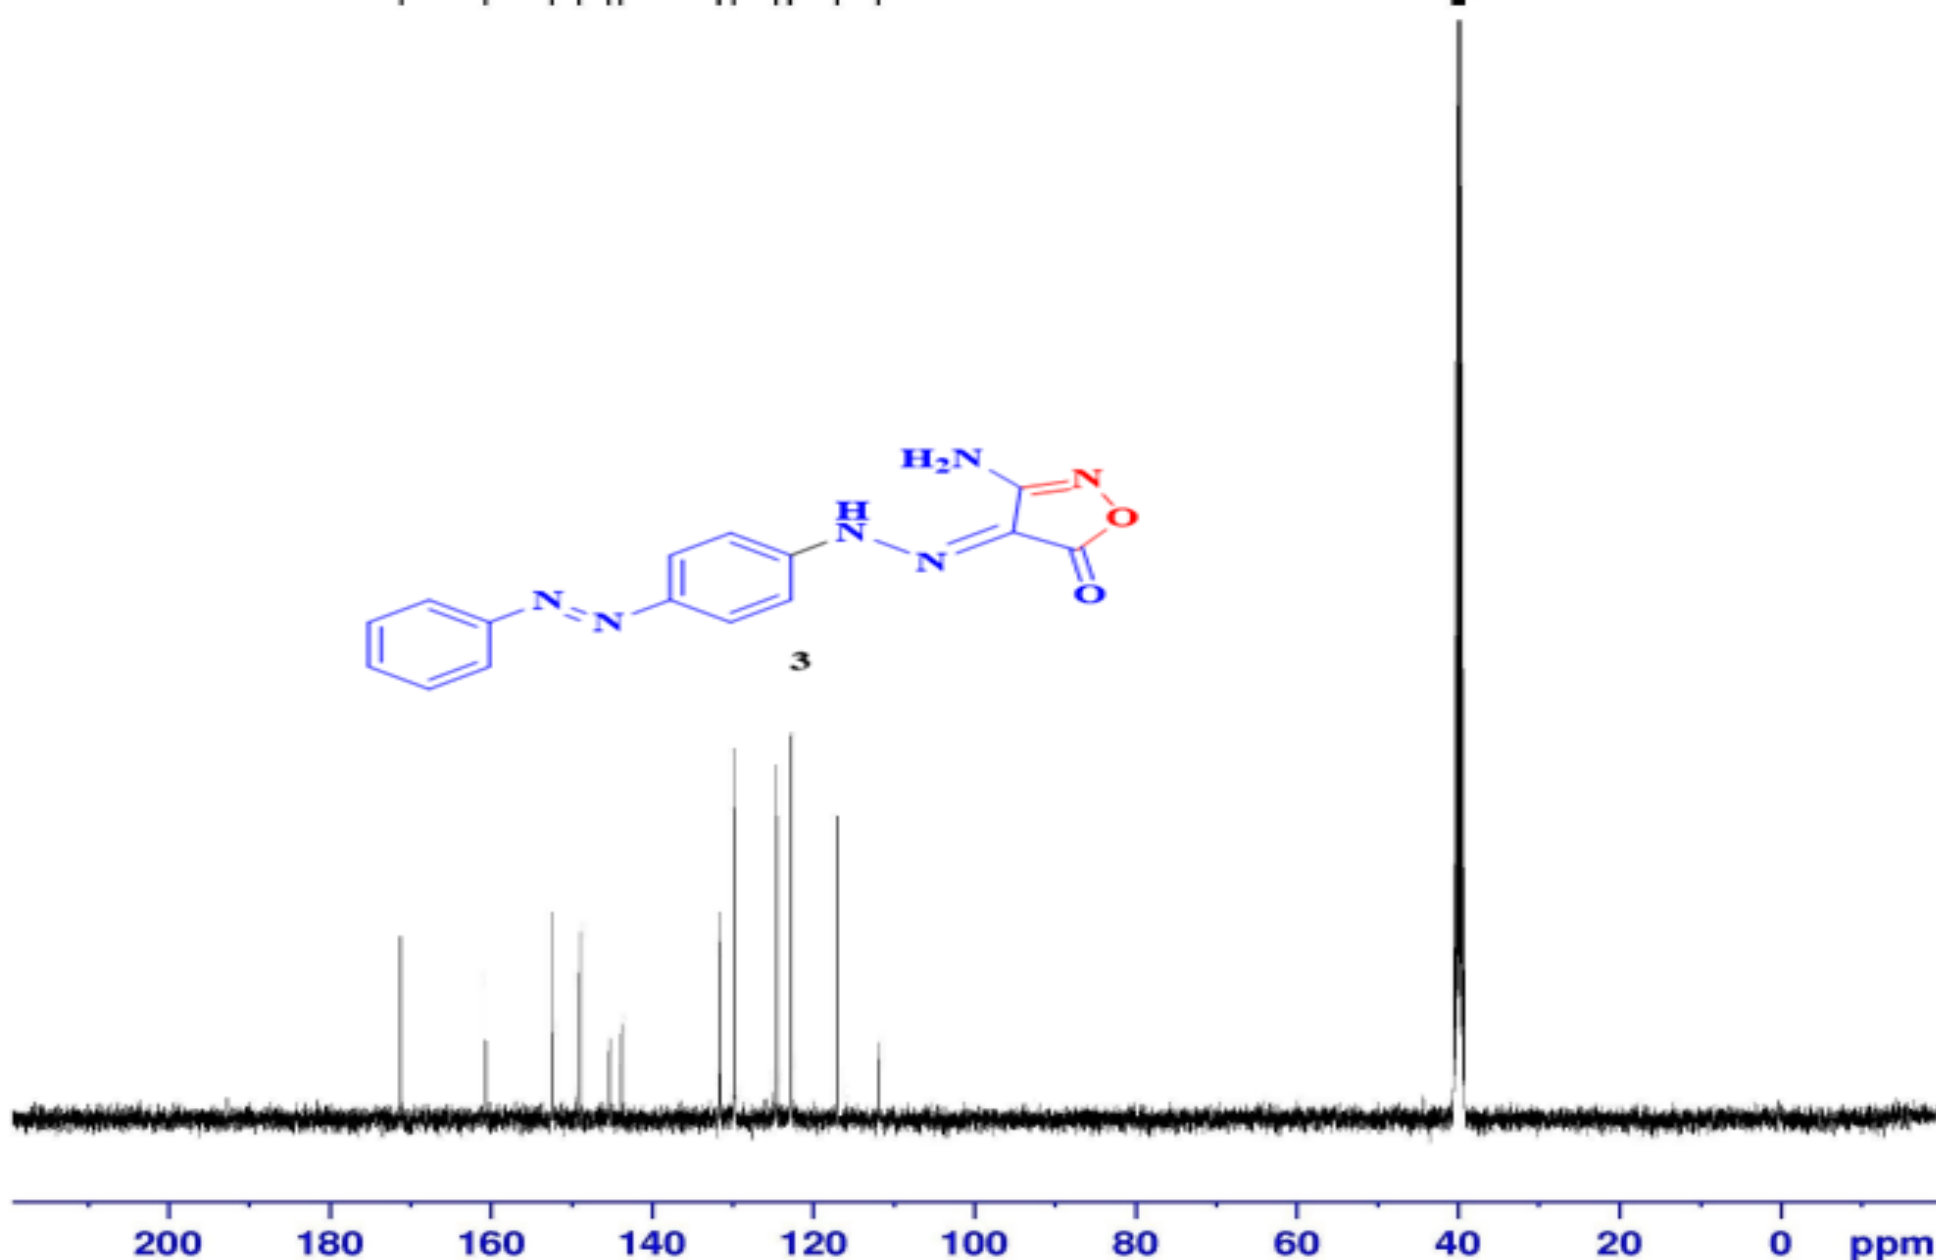

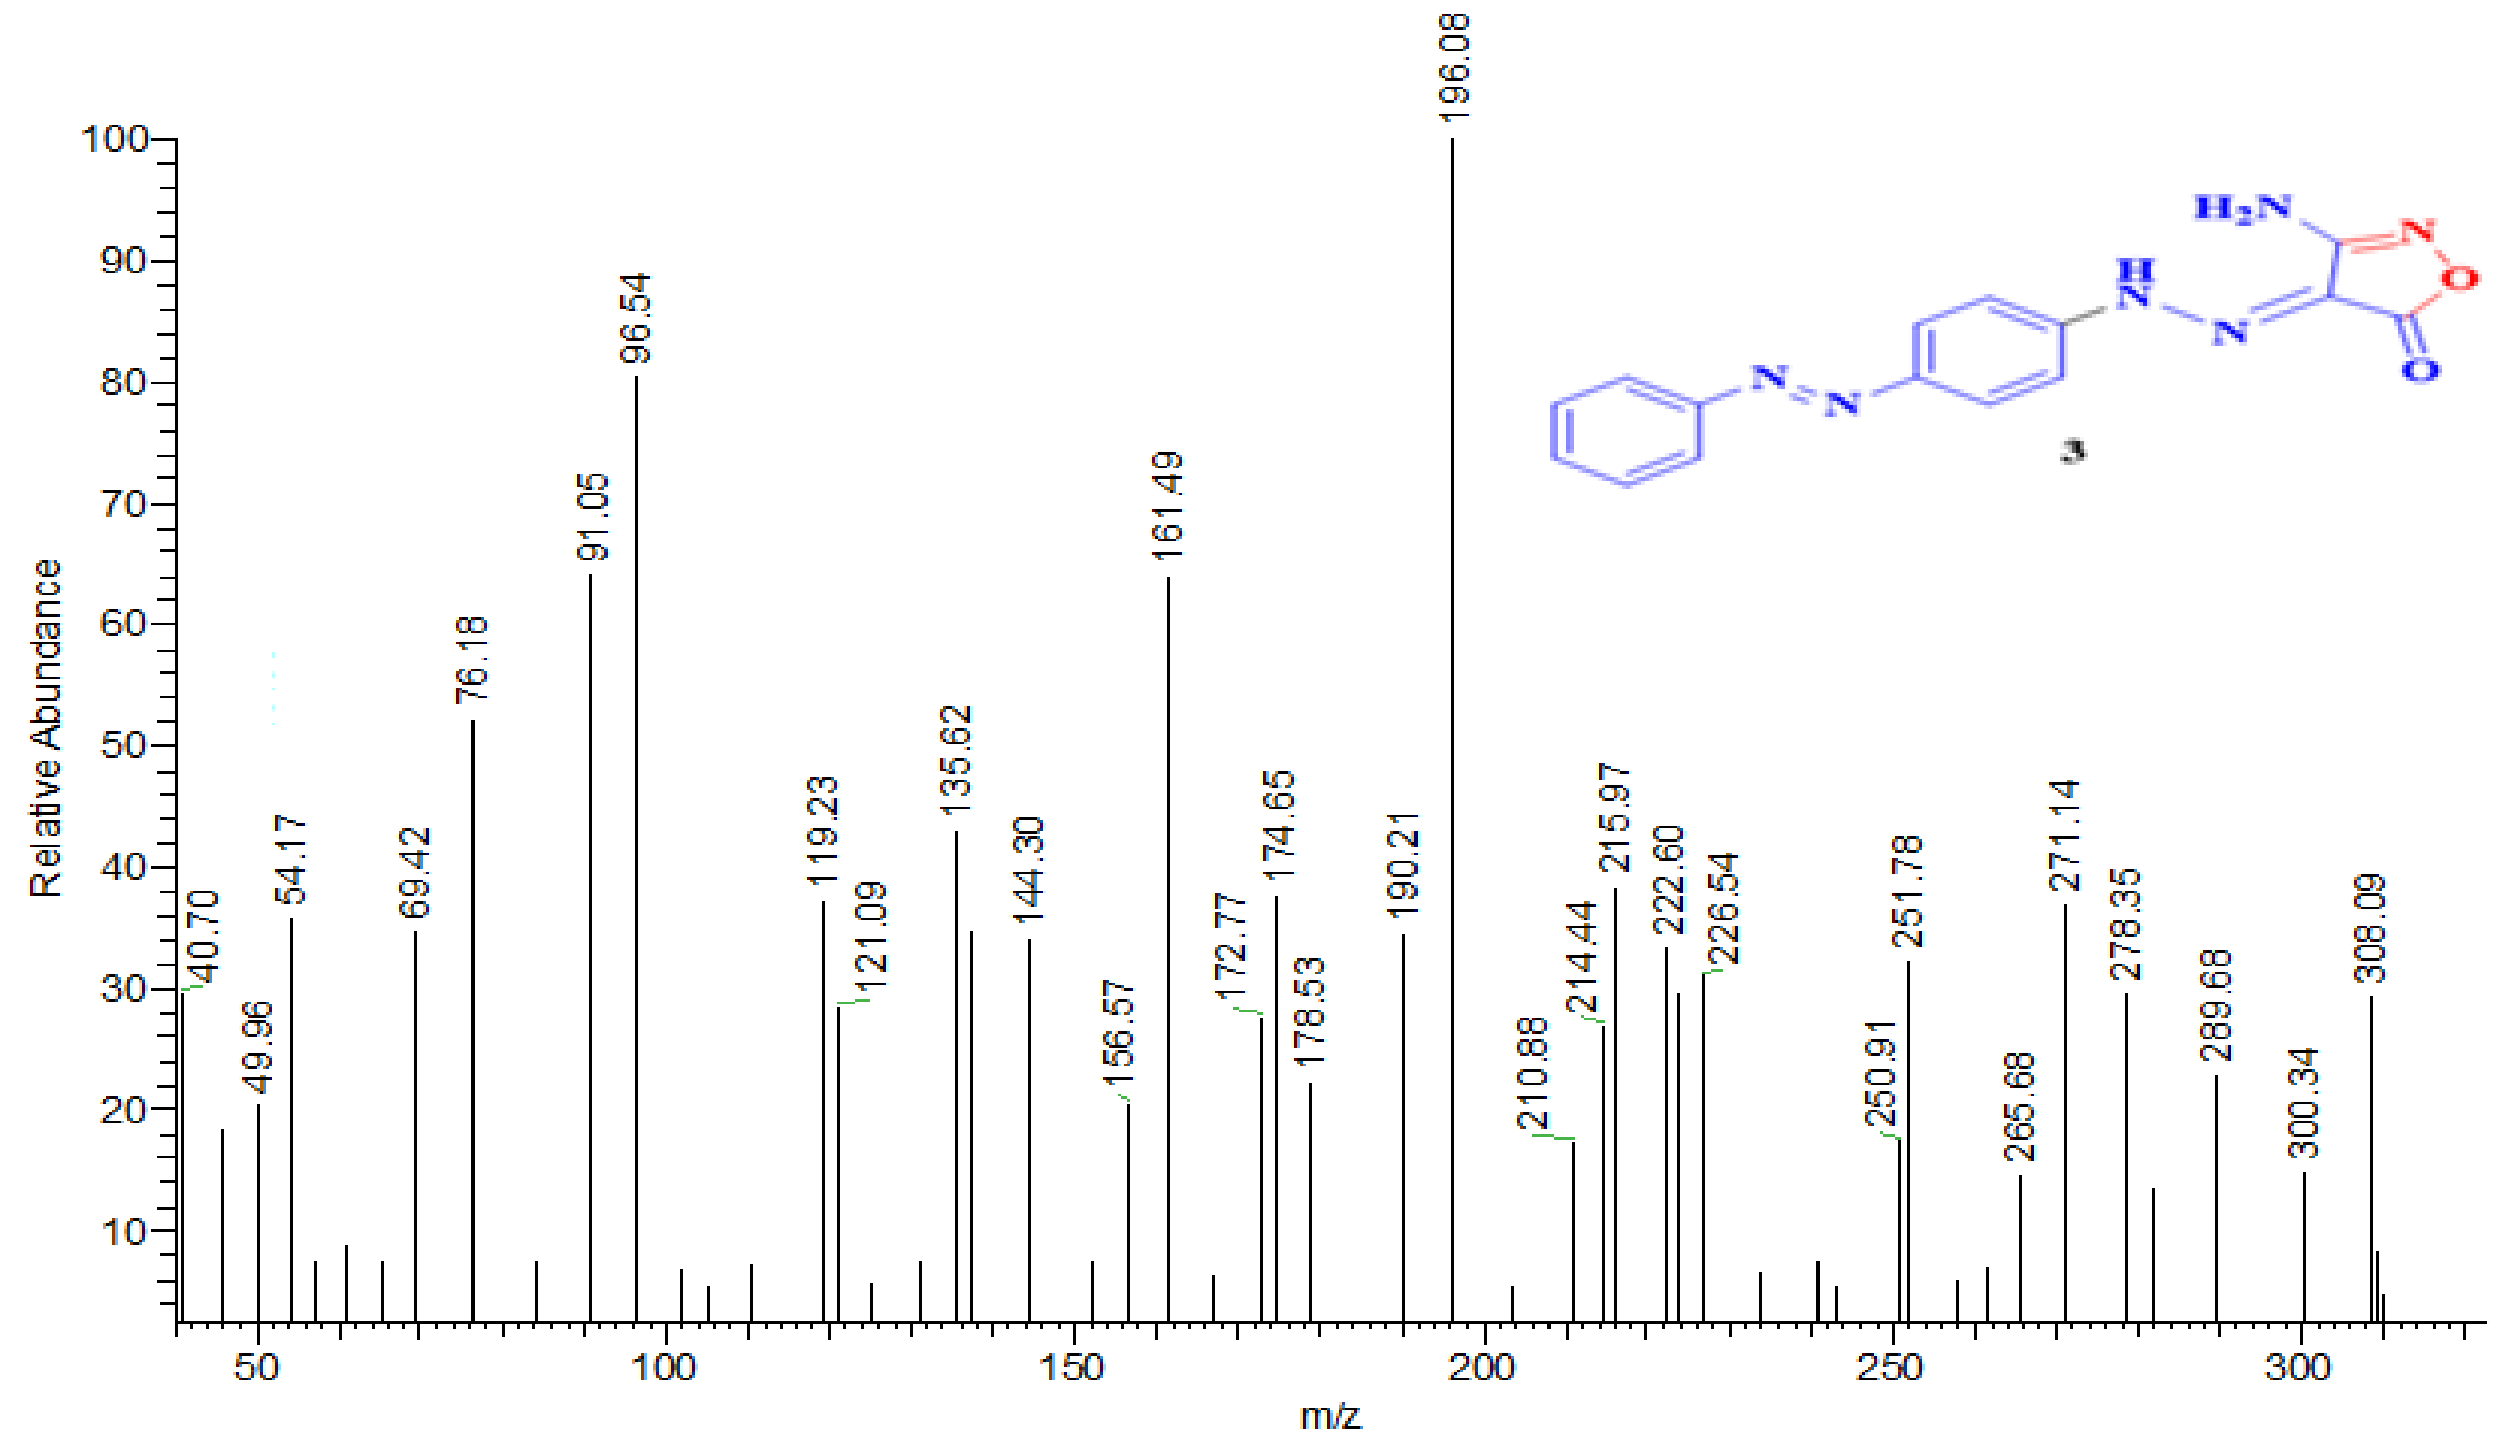

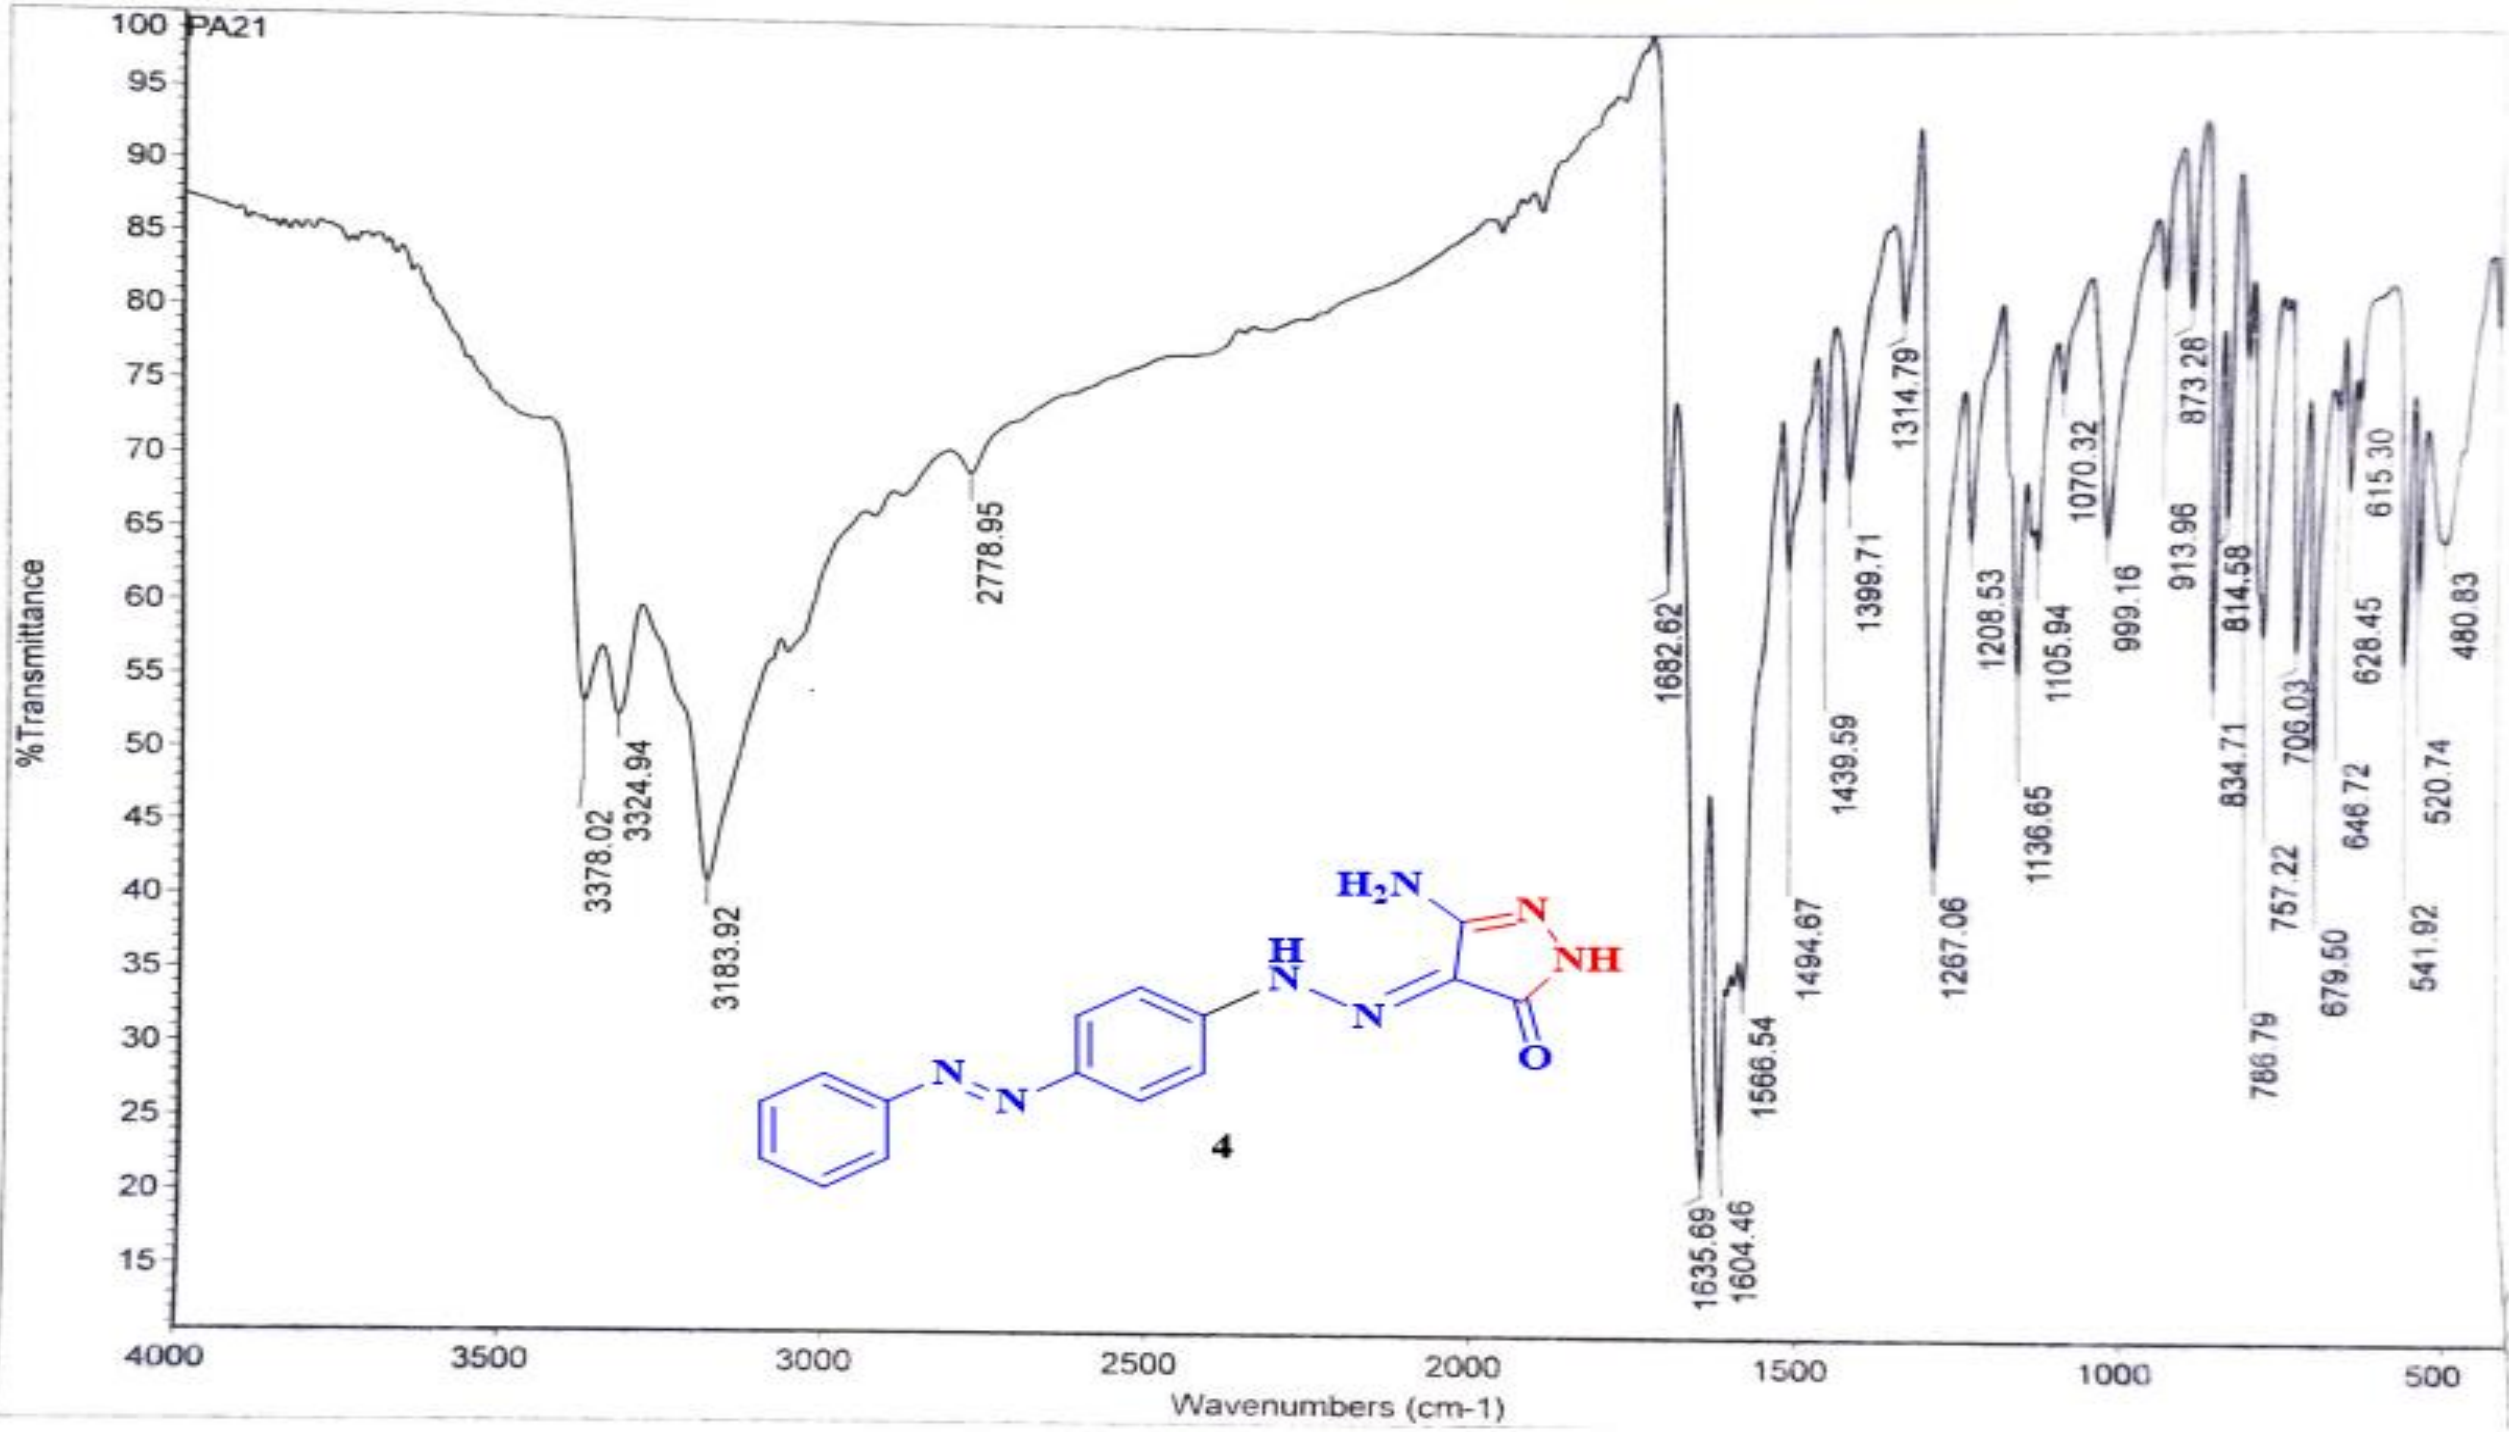

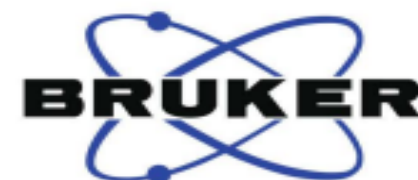

Current Data Parameters  
NAME nour eldin-PA21  
EXPNO 1  
PROCNO 1

F2 - Acquisition Parameters  
Date\_ 20230313  
Time 16.50  
INSTRUM spect  
PROBHD 5 mm PABBO BB/  
PULPROG zg30  
TD 65536  
SOLVENT DMSO  
NS 128  
DS 2  
SWH 8012.820 Hz  
FIDRES 0.122266 Hz  
AQ 4.0894465 sec  
RG 205.37  
DW 62.400 usec  
DE 6.50 usec  
TE 300.0 K  
D1 1.0000000 sec  
TDO 1

----- CHANNEL f1 -----  
SF01 400.1524711 MHz  
NUC1 1H  
P1 12.00 usec  
PLW1 18.00000000 W

F2 - Processing parameters  
SI 65536  
SF 400.1500000 MHz  
WDW EM  
SSB 0  
LB 0.30 Hz  
GB 0  
PC 1.00

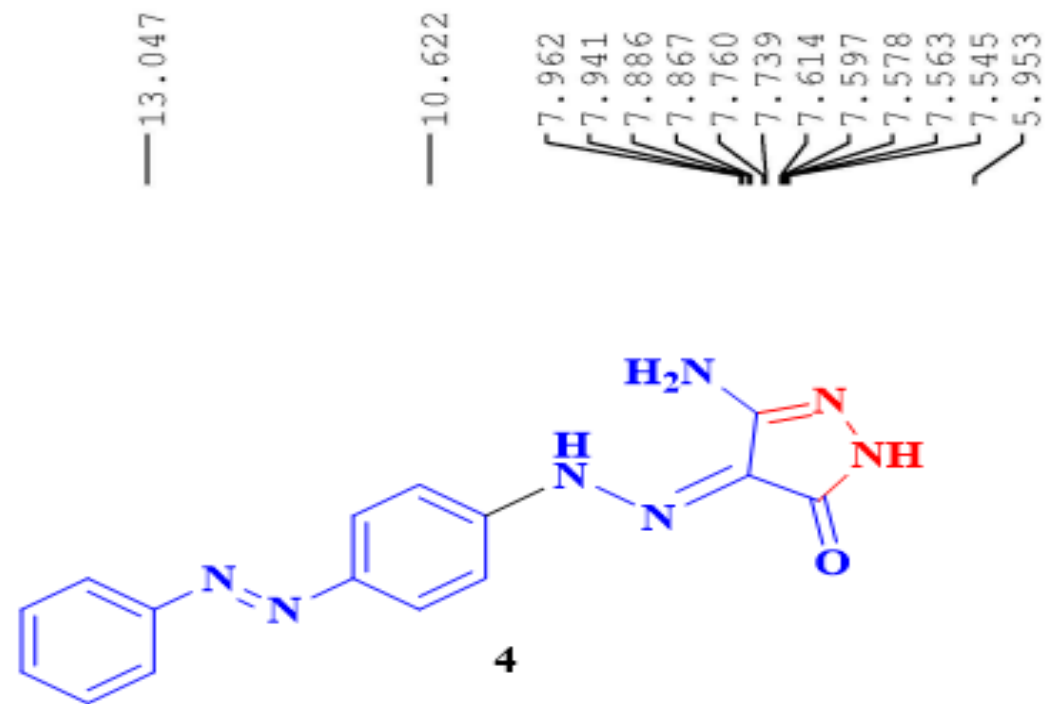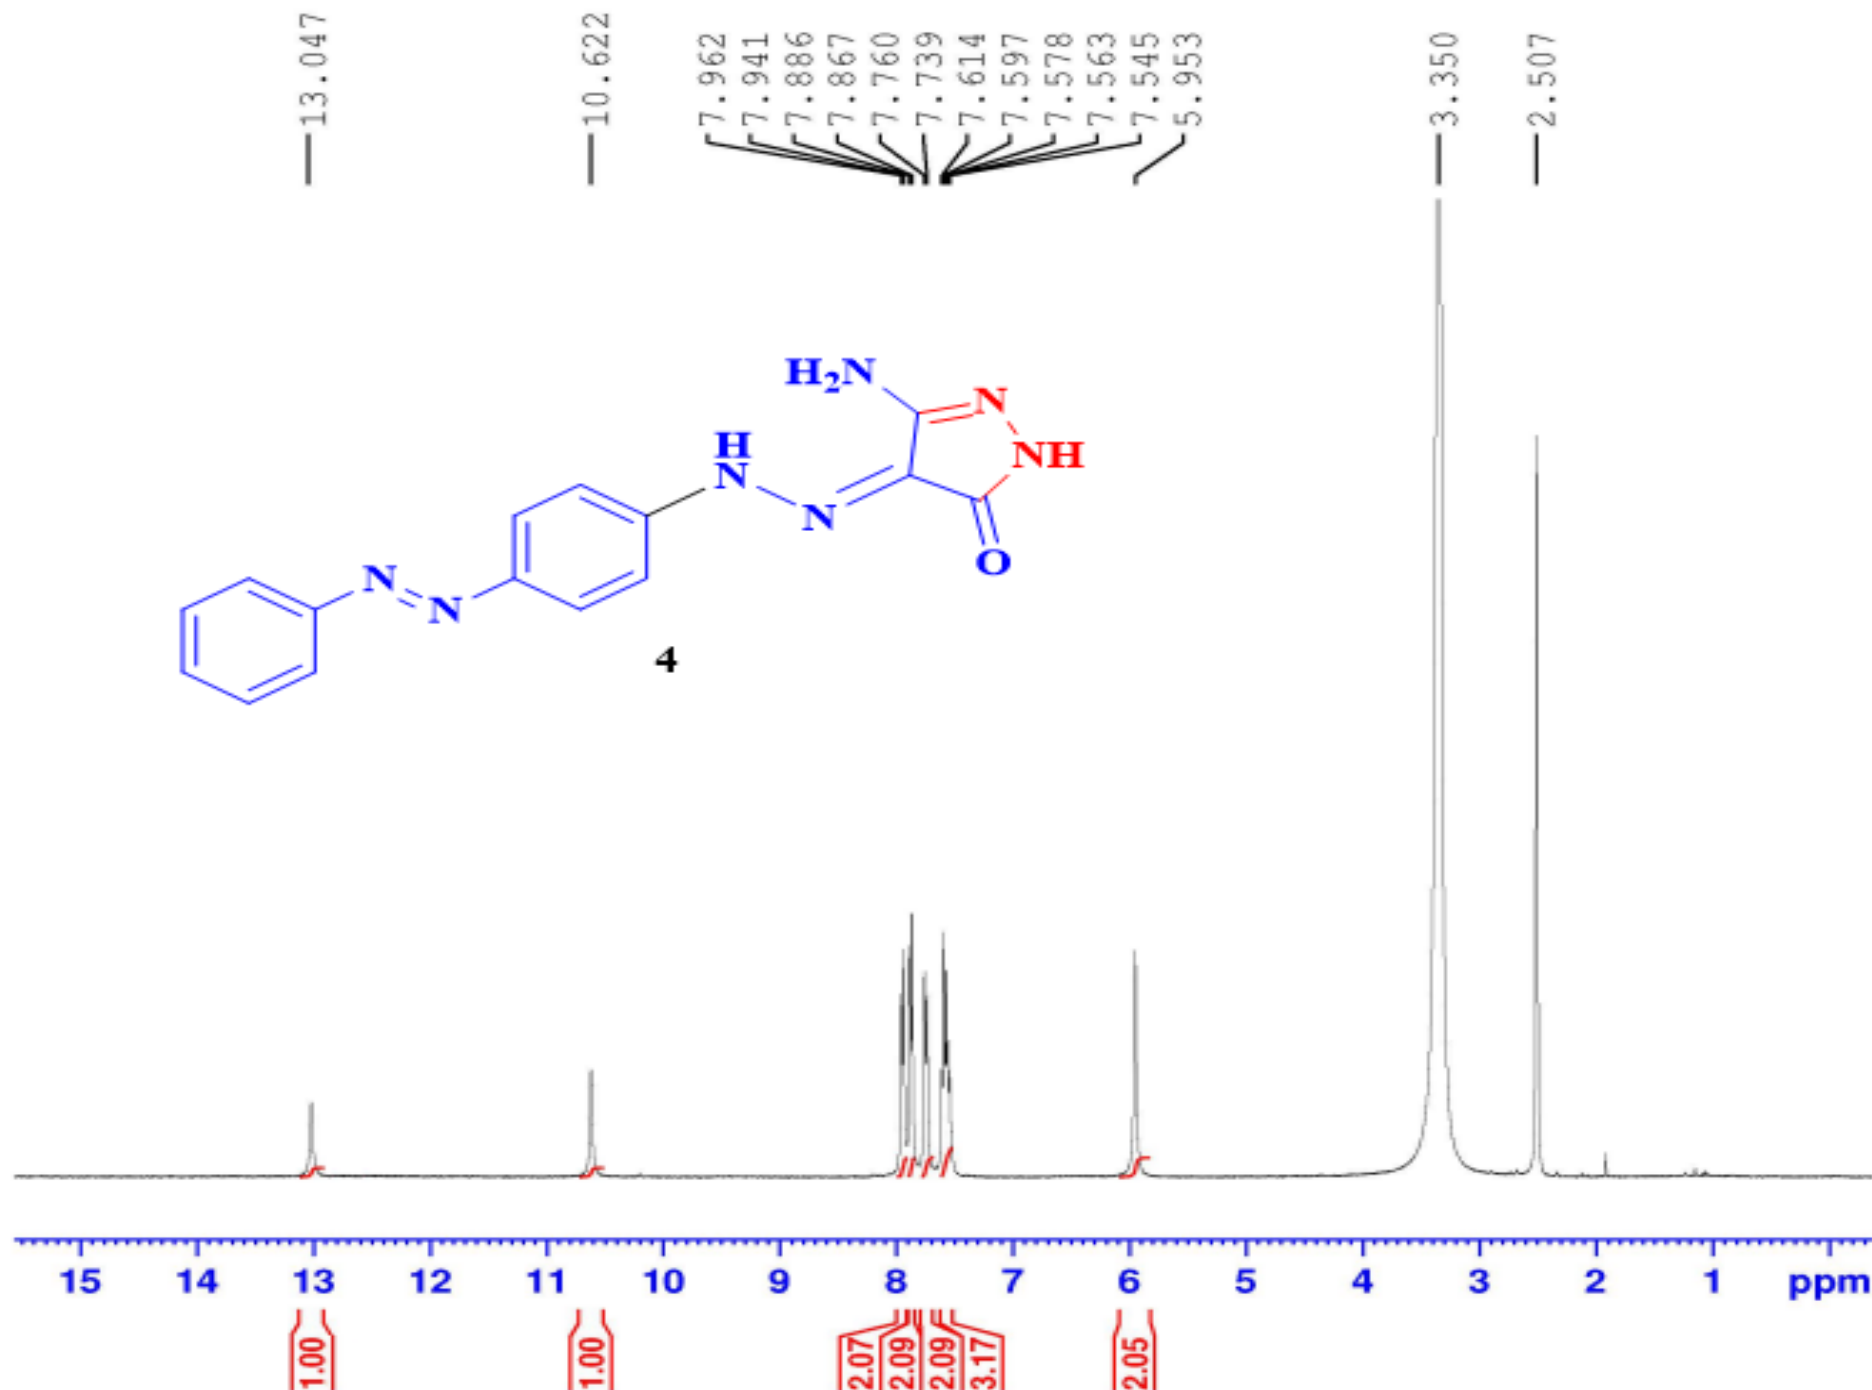



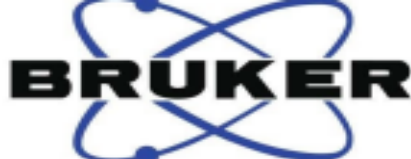

161.30  
160.62  
152.51  
149.28  
145.42  
143.90  
131.89  
131.60  
129.89  
124.69  
122.95  
122.88  
117.36  
117.22  
111.93

40.61  
40.40  
40.19  
39.98  
39.77  
39.56  
39.36

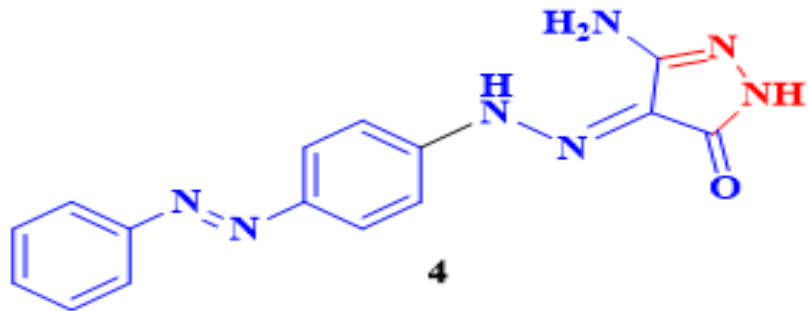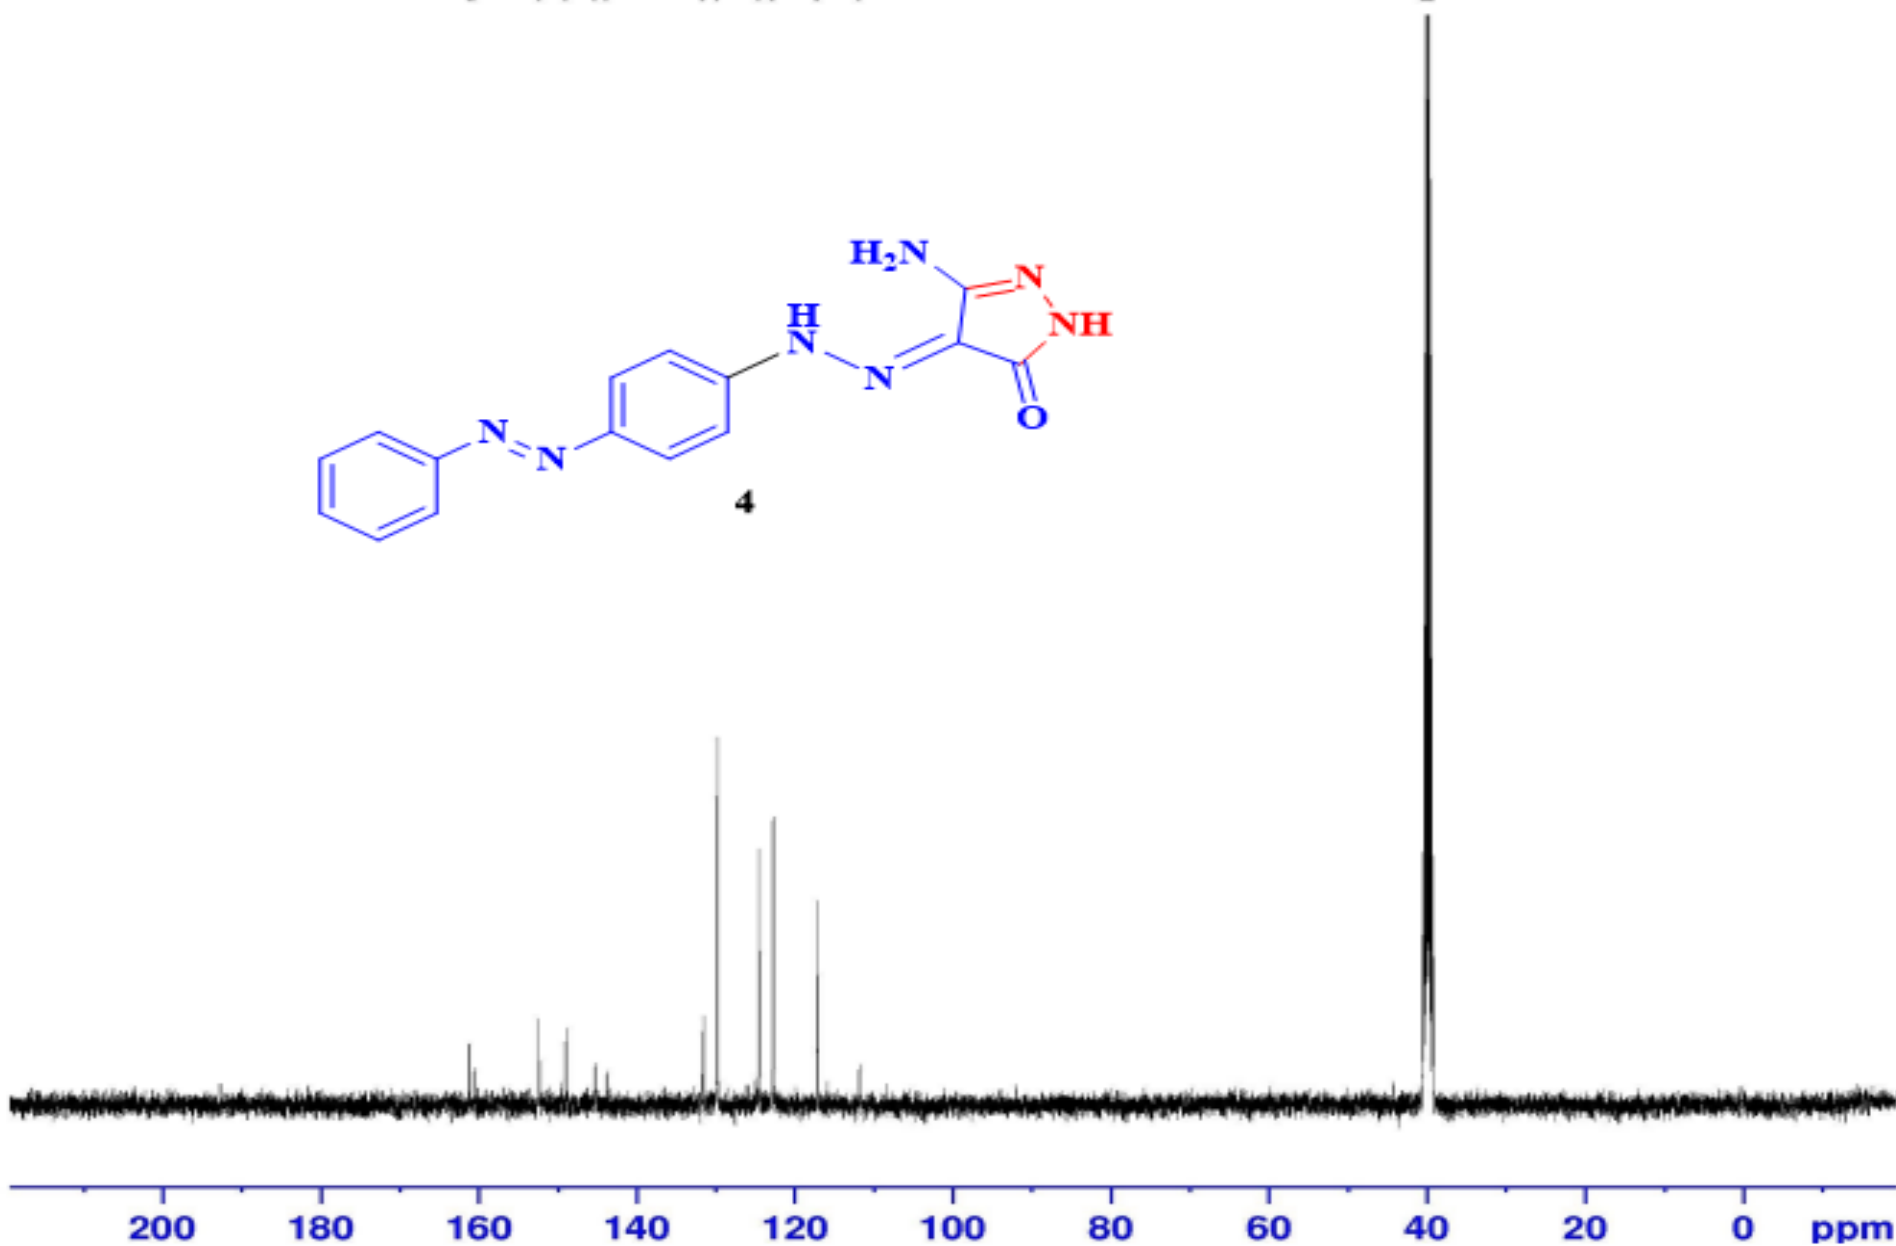

Current Data Parameters  
NAME        nour eldin-PA21  
EXPNO       2  
PROCNO      1

F2 - Acquisition Parameters  
Date\_        20230314  
Time         10.13  
INSTRUM     spect  
PROBHD      5 mm PABBO BB/  
PULPROG     zgpg30  
TD           65536  
SOLVENT     DMSO  
NS           1500  
DS           4  
SWH          24038.461 Hz  
FIDRES      0.366798 Hz  
AQ           1.3631488 sec  
RG           205.37  
DW           20.800 usec  
DE           6.50 usec  
TE           300.0 K  
D1           2.00000000 sec  
D11          0.03000000 sec  
TDO          1

----- CHANNEL f1 -----  
SFO1         100.6278588 MHz  
NUC1         13C  
P1           10.00 usec  
PLW1         47.00000000 W

----- CHANNEL f2 -----  
SFO2         400.1516006 MHz  
NUC2         1H  
CPDPRG[2     waltz16  
PCPD2        90.00 usec  
PLW2         18.00000000 W  
PLW12        0.34722000 W  
PLW13        0.28125000 W

F2 - Processing parameters  
SI           32768  
SF           100.6177975 MHz  
WDW          EM  
SSB          0  
LB           1.00 Hz  
GB           0  
PC           1.40

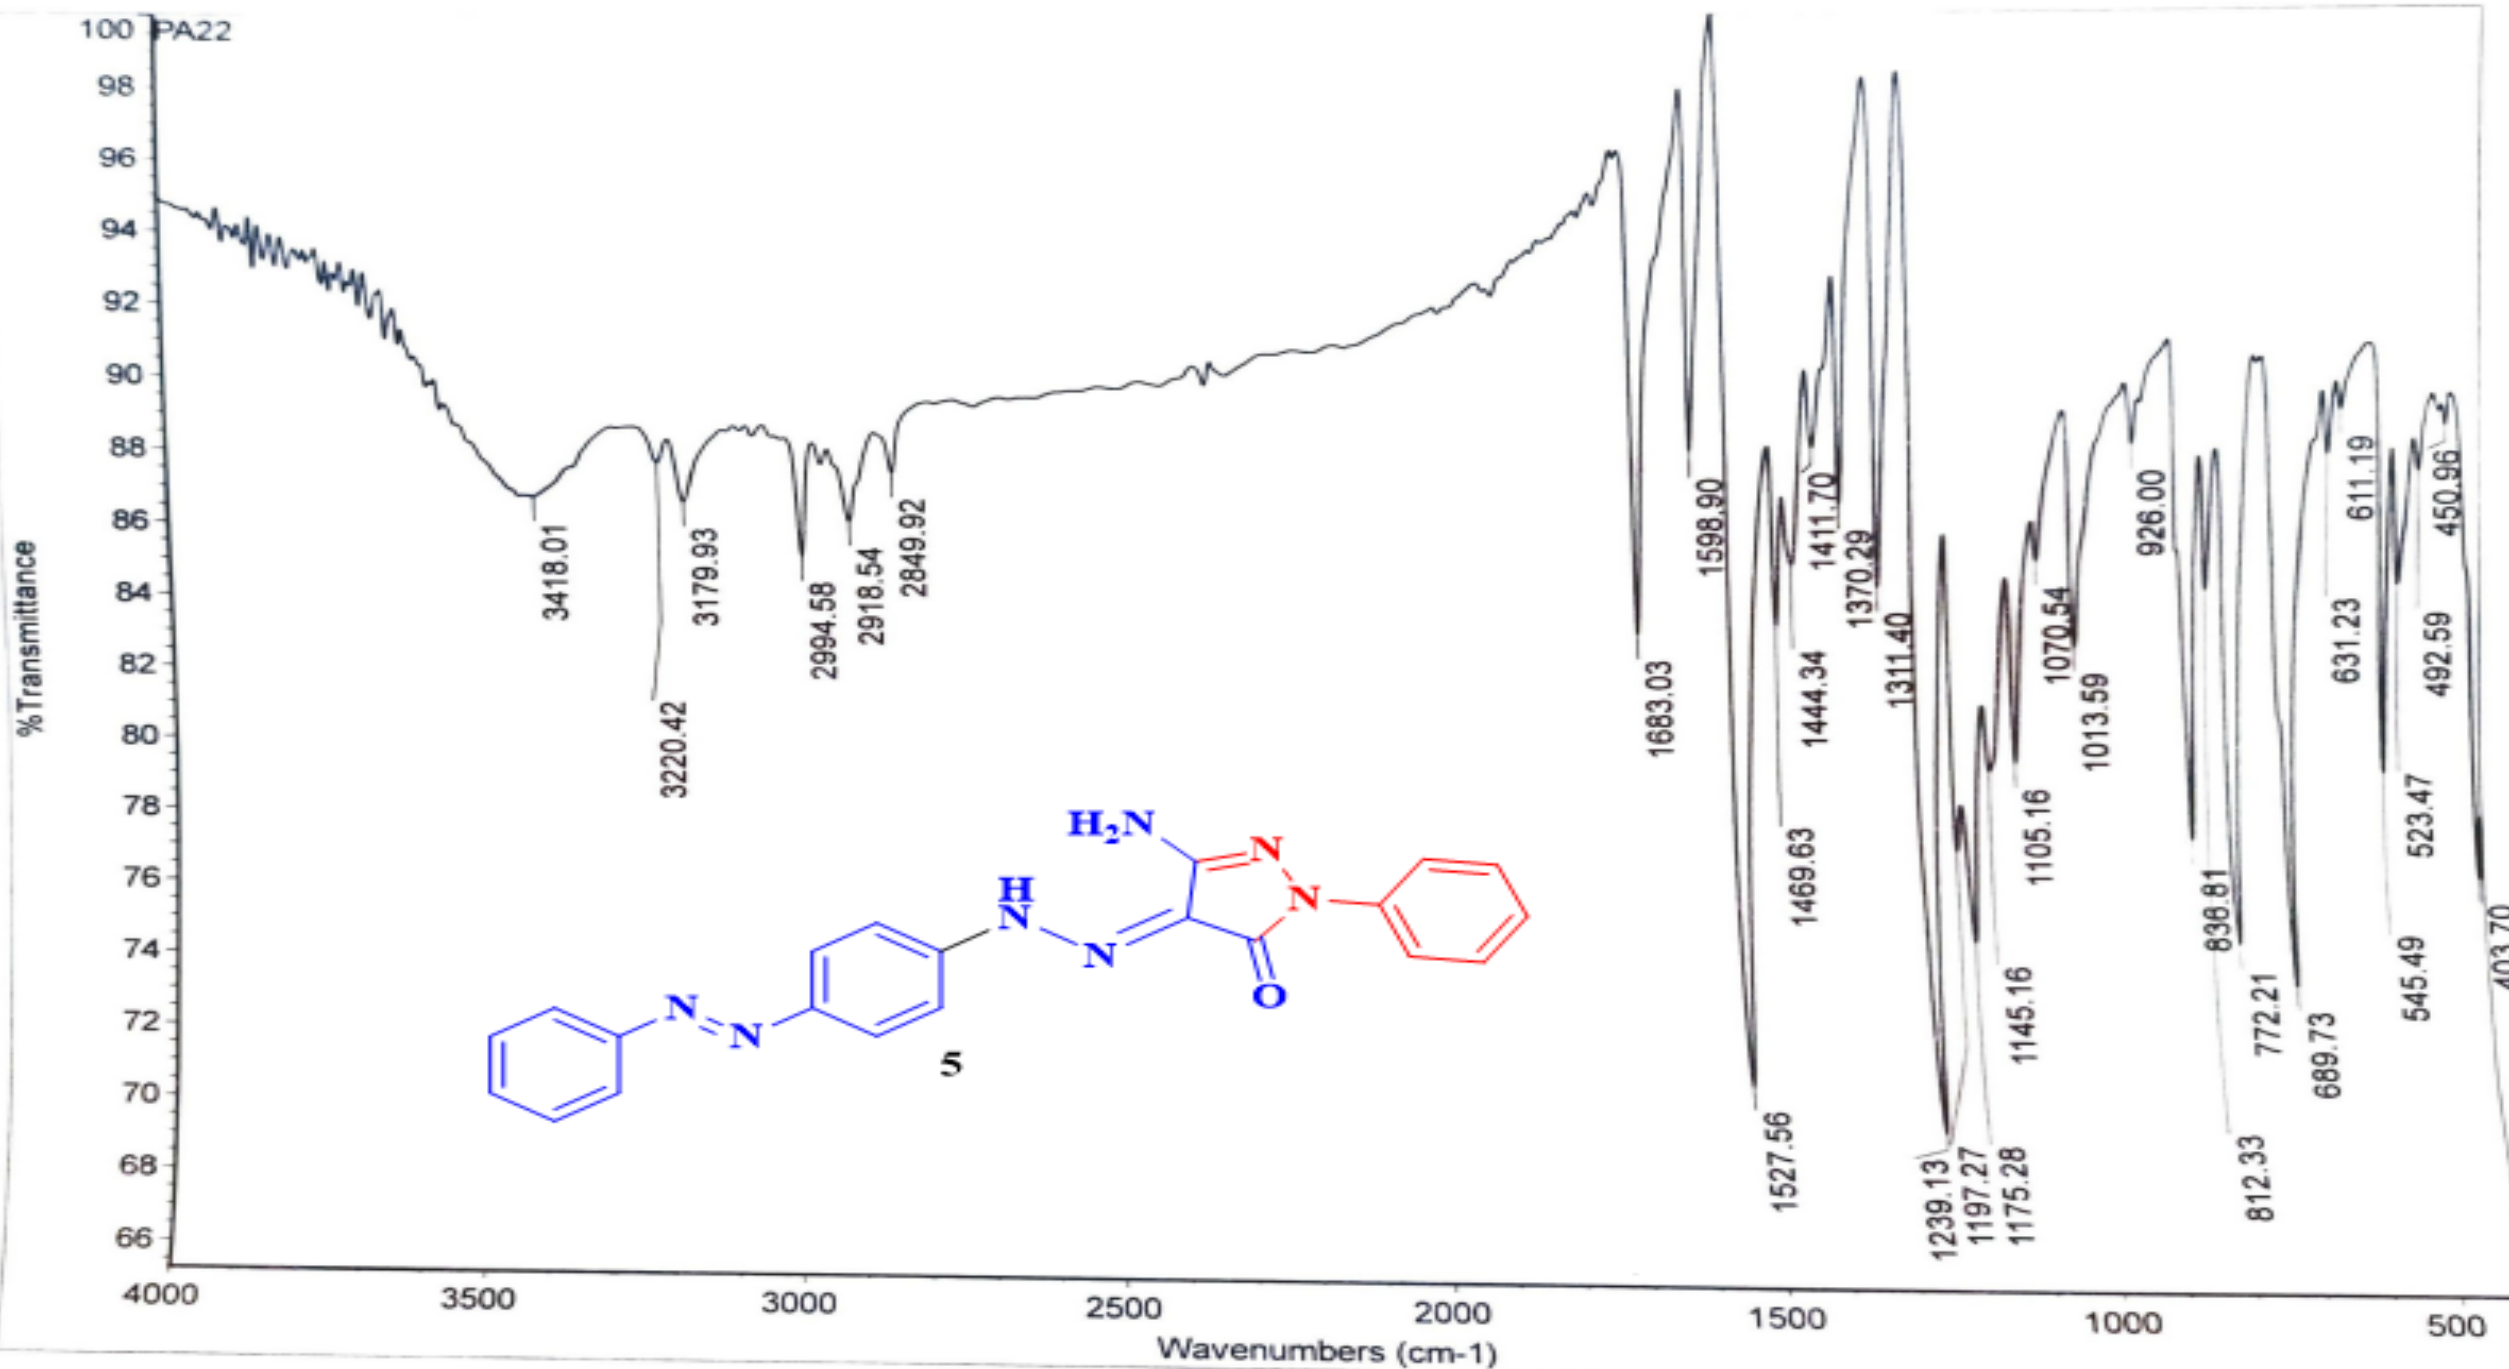

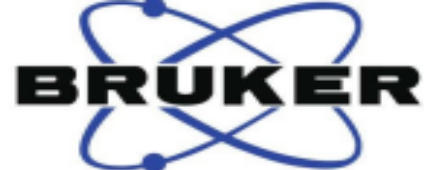

Current Data Parameters  
NAME        nour eldin-PA22  
EXPNO       1  
PROCNO      1

F2 - Acquisition Parameters  
Date\_        20230313  
Time         17.03  
INSTRUM     spect  
PROBHD      5 mm PABBO BB/  
PULPROG     zg30  
TD          65536  
SOLVENT     DMSO  
NS          128  
DS          2  
SWH         8012.820 Hz  
FIDRES      0.122266 Hz  
AQ          4.0894465 sec  
RG          205.37  
DW          62.400 usec  
DE          6.50 usec  
TE          300.0 K  
D1          1.00000000 sec  
TDO         1

----- CHANNEL f1 -----  
SFO1         400.1524711 MHz  
NUC1         1H  
P1            12.00 usec  
PLW1         18.00000000 W

F2 - Processing parameters  
SI            65536  
SF            400.1500000 MHz  
WDW           EM  
SSB          0  
LB            0.30 Hz  
GB          0  
PC            1.00

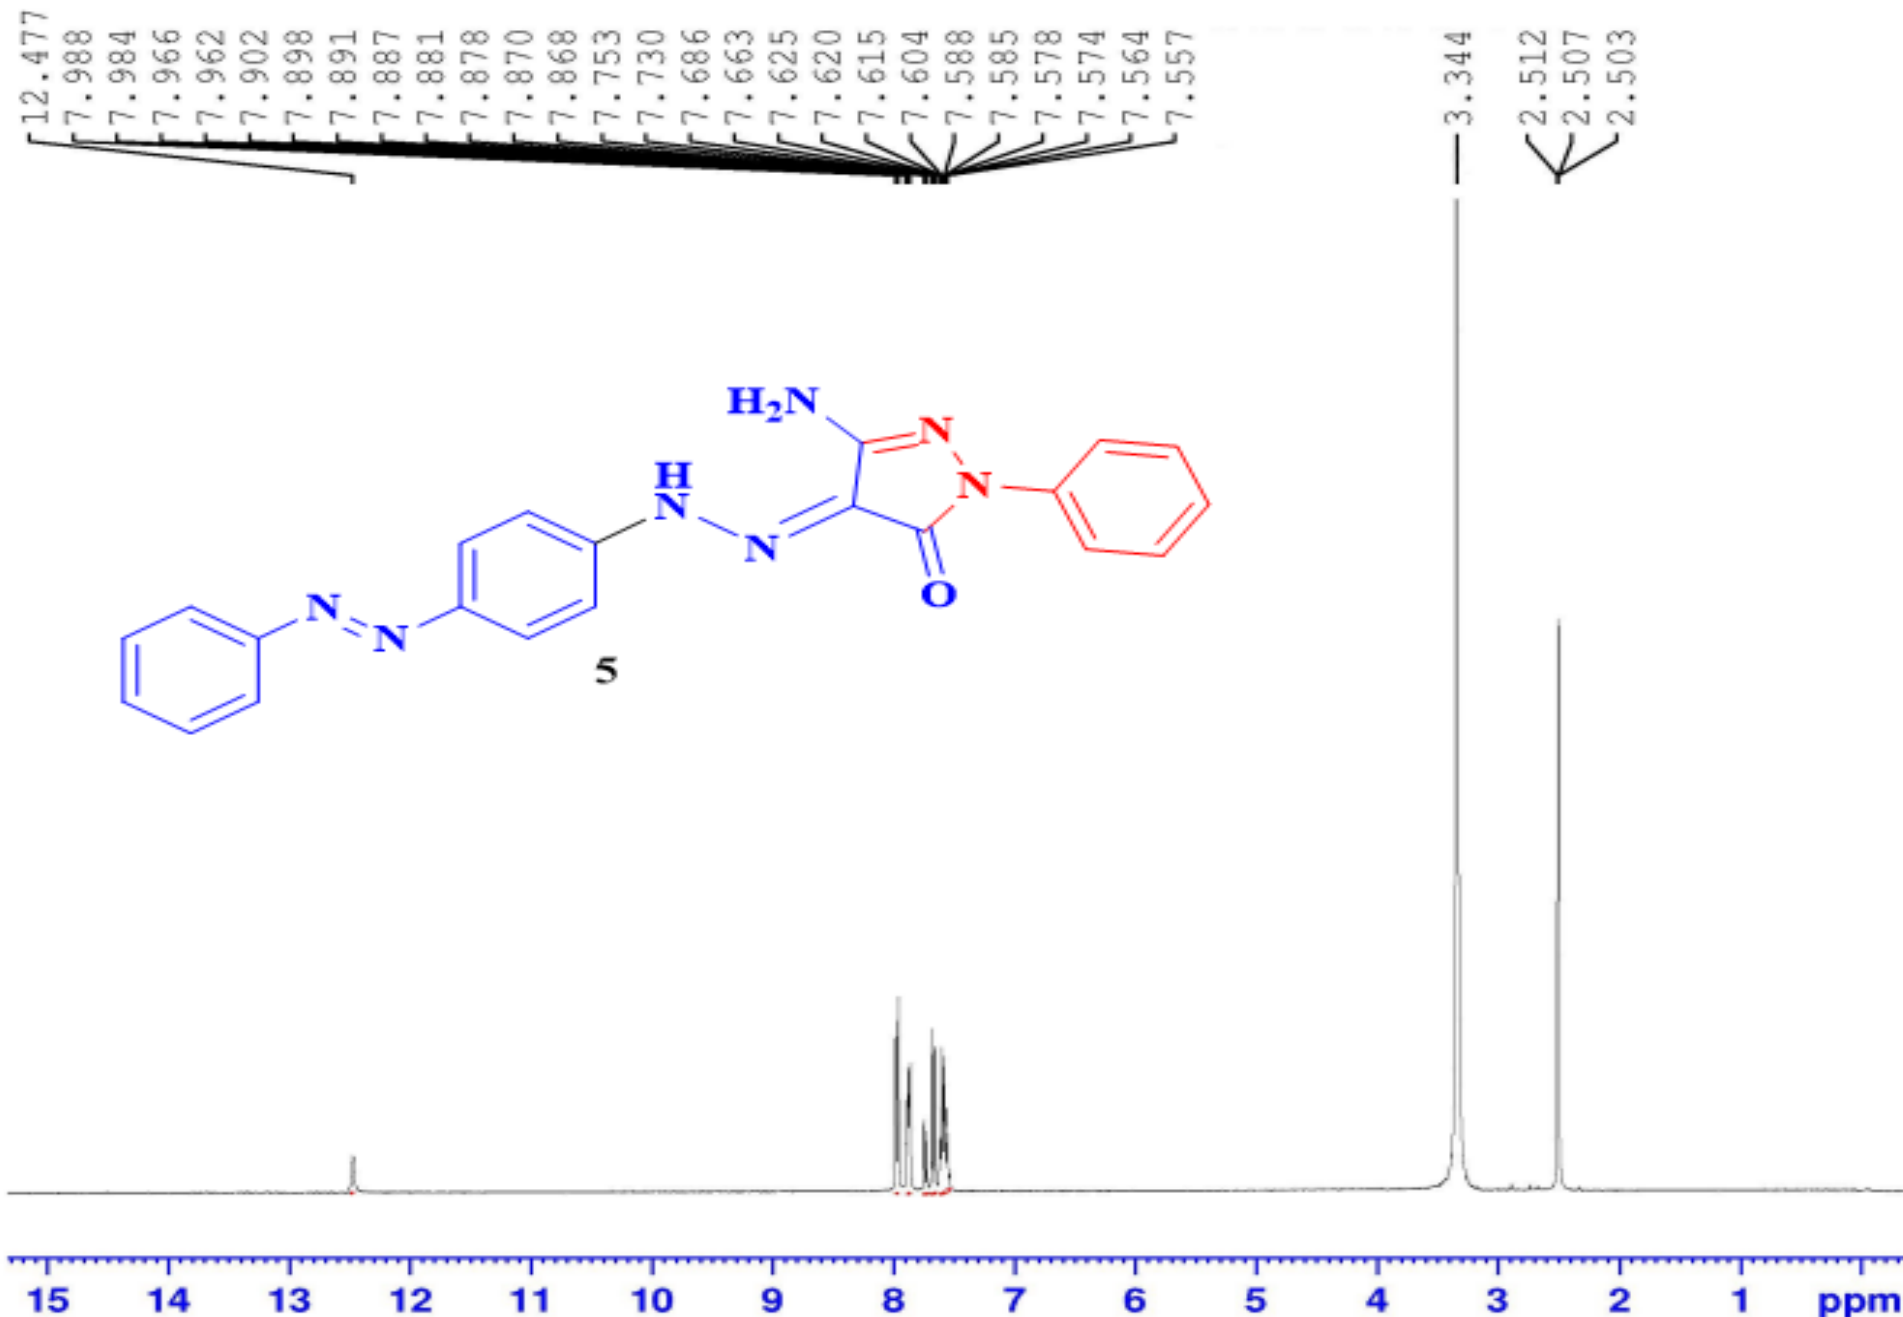

15   14   13   12   11   10   9   8   7   6   5   4   3   2   1   ppm

12.477  
7.988  
7.984  
7.966  
7.962  
7.902  
7.898  
7.891  
7.887  
7.881  
7.878  
7.870  
7.868  
7.753  
7.730  
7.686  
7.663  
7.625  
7.620  
7.615  
7.604  
7.588  
7.585  
7.578  
7.574  
7.564  
7.557

3.344  
2.512  
2.507  
2.503

1.03

2.14  
2.19  
2.09  
2.04  
7.97

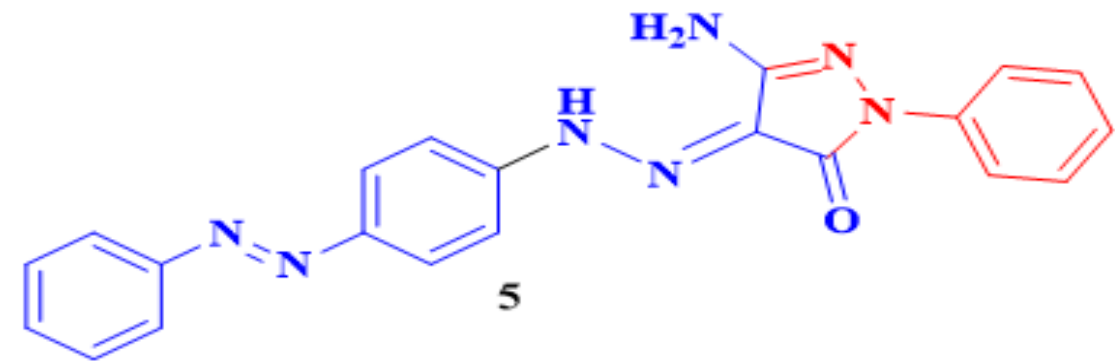

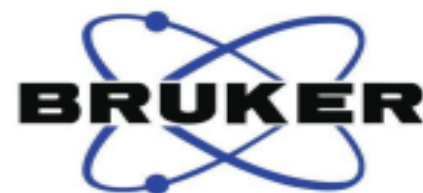

Current Data Parameters  
NAME nour eldin-PA22-d2o  
EXPNO 2  
PROCNO 1

F2 - Acquisition Parameters  
Date\_ 20230322  
Time 10.37  
INSTRUM spect  
PROBHD 5 mm PABBO BB/  
PULPROG zg30  
TD 65536  
SOLVENT DMSO  
NS 77  
DS 2  
SWH 8012.820 Hz  
FIDRES 0.122266 Hz  
AQ 4.0894465 sec  
RG 205.37  
DW 62.400 usec  
DE 6.50 usec  
TE 300.0 K  
D1 1.00000000 sec  
TDO 1

===== CHANNEL f1 =====  
SFO1 400.1524711 MHz  
NUC1 1H  
P1 12.00 usec  
PLW1 18.00000000 W

F2 - Processing parameters  
SI 65536  
SF 400.150000 MHz  
WDW EM  
SSB 0  
LB 0.30 Hz  
GB 0  
PC 1.00

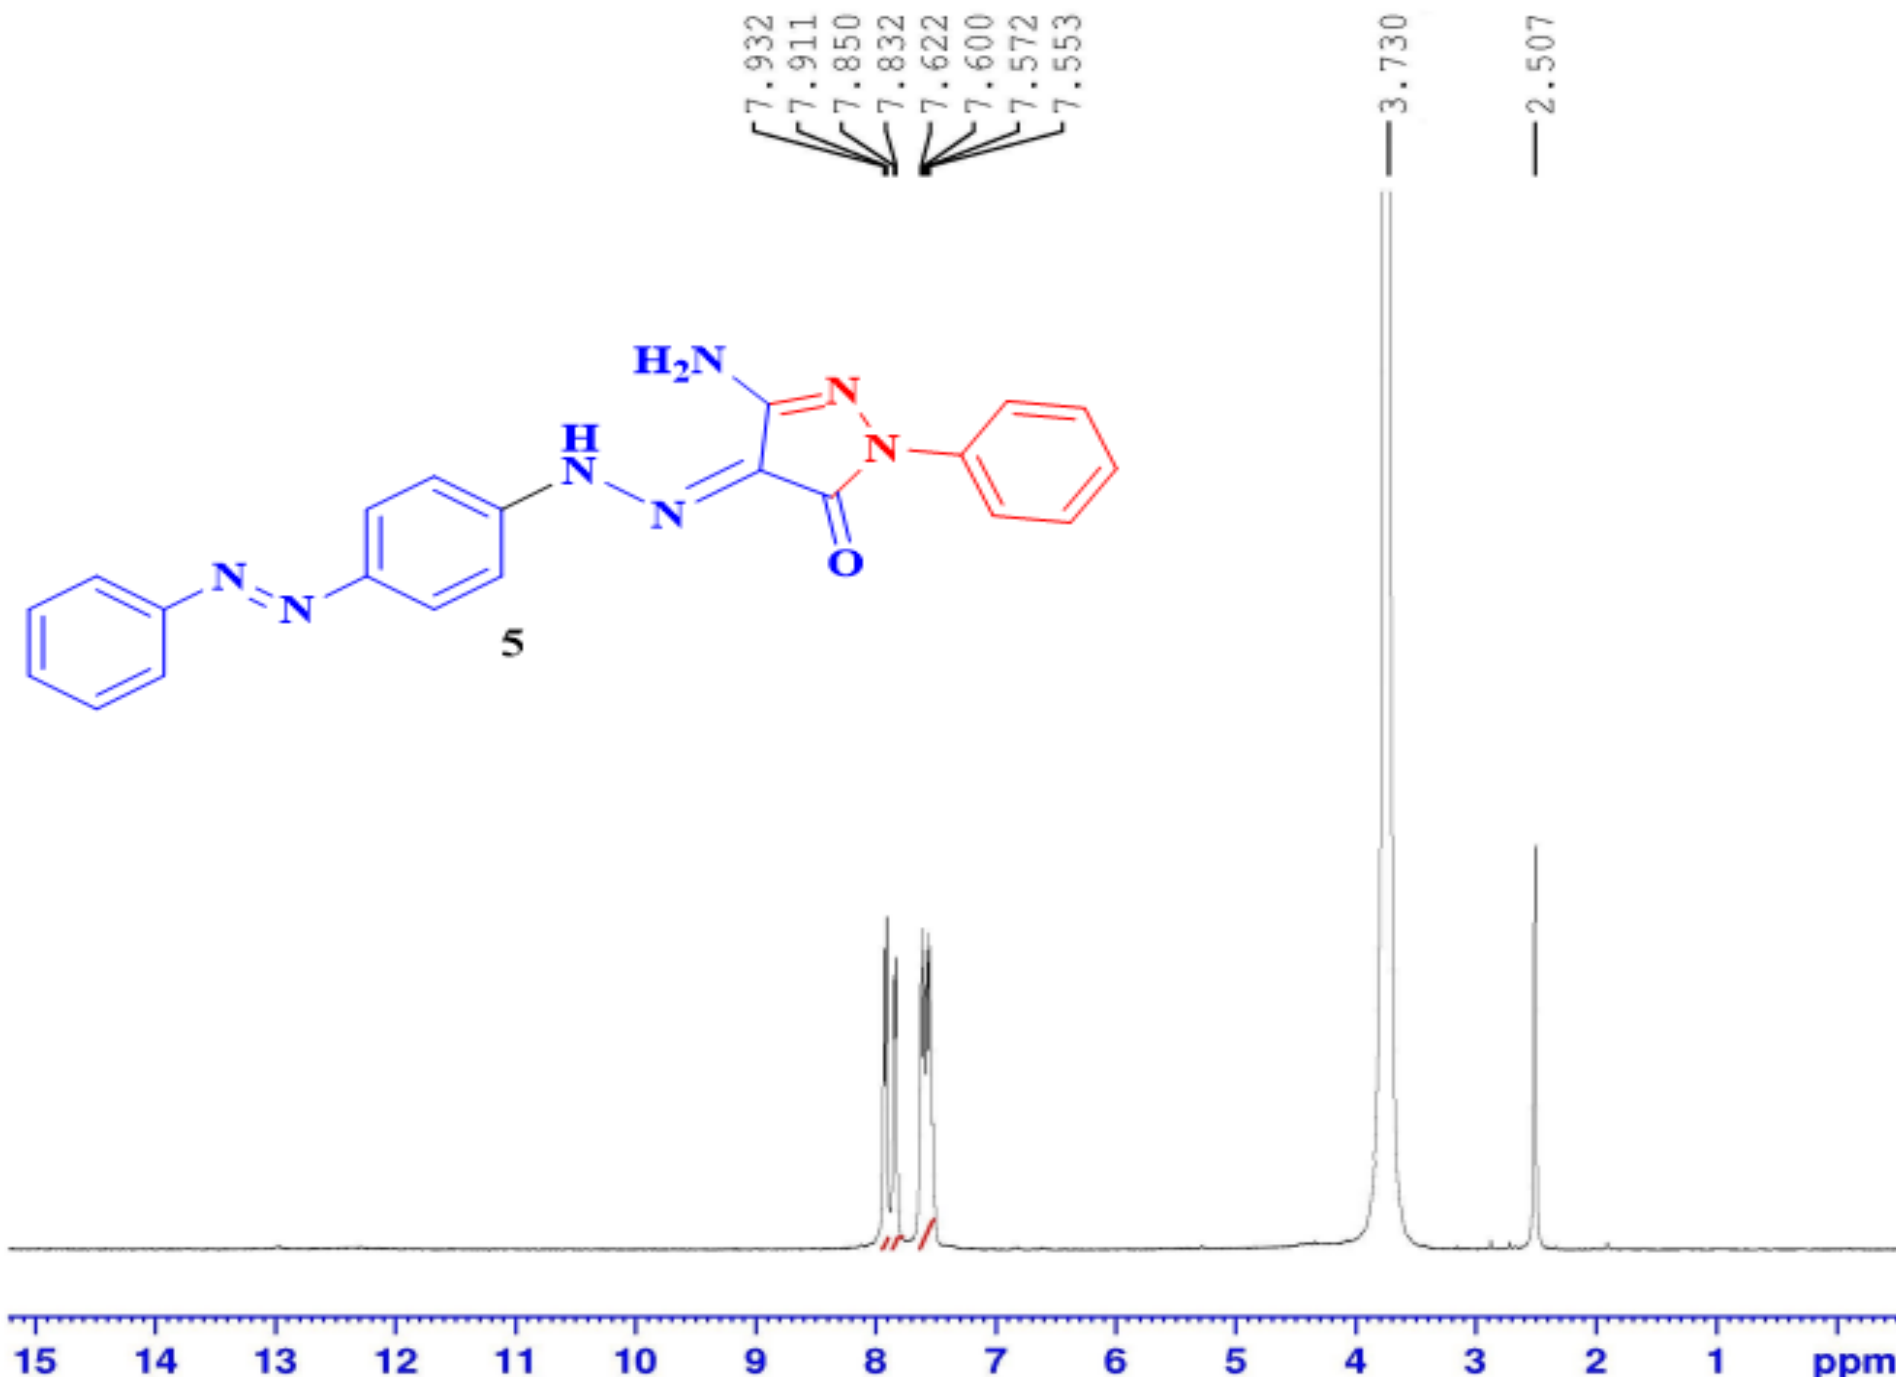

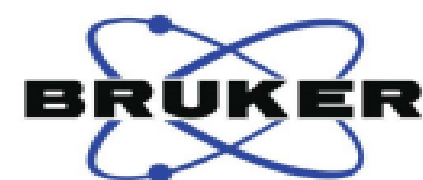

Current Data Parameters  
NAME neur eldin-PA22  
EXPNO 2  
PROCNO 1

F2 - Acquisition Parameters  
Date\_ 20230315  
Time 12.50  
INSTRUM spect  
PROBHD 5 mm PABBO BB/  
PULPROG zgpg30  
TD 65536  
SOLVENT DMSO  
NS 900  
DS 4  
SWH 24038.461 Hz  
FIDRES 0.366798 Hz  
AQ 1.3631488 sec  
RG 205.37  
DW 20.800 usec  
DE 6.50 usec  
TE 300.0 K  
D1 2.00000000 sec  
D11 0.03000000 sec  
TD0 1

----- CHANNEL f1 -----  
SFO1 100.6278588 MHz  
NUC1 13C  
P1 10.00 usec  
PLW1 47.00000000 W

----- CHANNEL f2 -----  
SFO2 400.1516006 MHz  
NUC2 1H  
CPDPRG[2] waltz16  
PCPD2 90.00 usec  
PLW2 18.00000000 W  
PLW12 0.34722000 W  
PLW13 0.28125000 W

F2 - Processing parameters  
SI 32768  
SF 100.6177975 MHz  
WDW EM  
SSB 0  
LB 1.00 Hz  
GB 0  
PC 1.40

161.16  
160.72  
152.49  
149.11  
145.04  
143.96  
131.82  
131.69  
129.90  
124.70  
124.66  
122.94  
122.89  
117.30  
117.14  
111.75  
106.54  
105.94

40.59  
40.38  
40.17  
39.96  
39.75  
39.55  
39.34

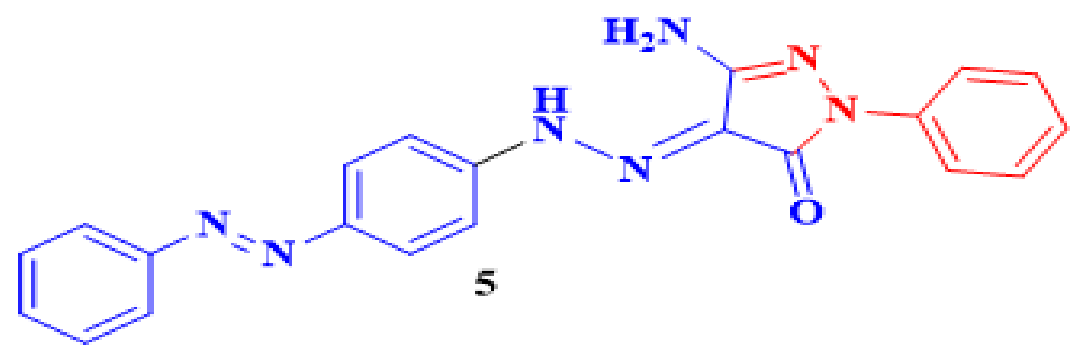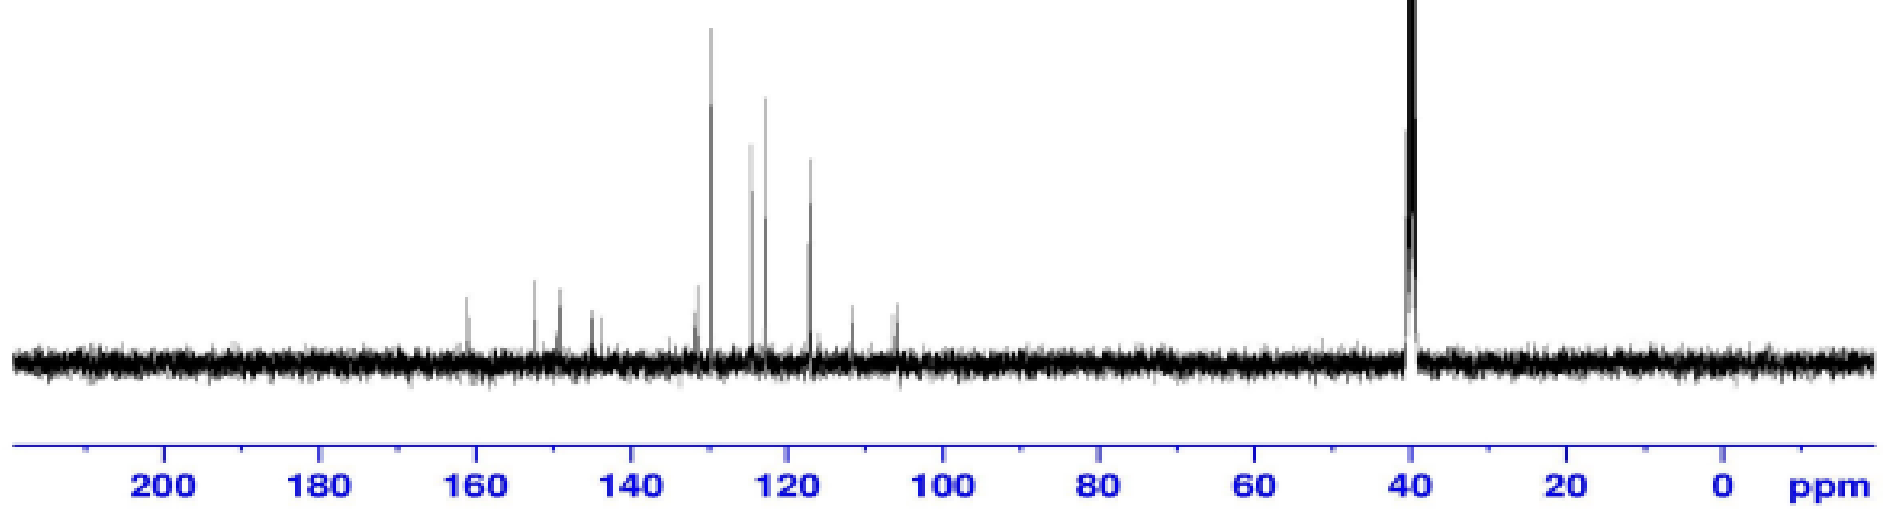

kerles-PA22 #101 RT: 1.71 AV: 1 SB: 26 1.21-1.34 , 0.87-1.14 NL: 2.55E4

T: {0,0} + c EI Full ms [40.00-1000.00]

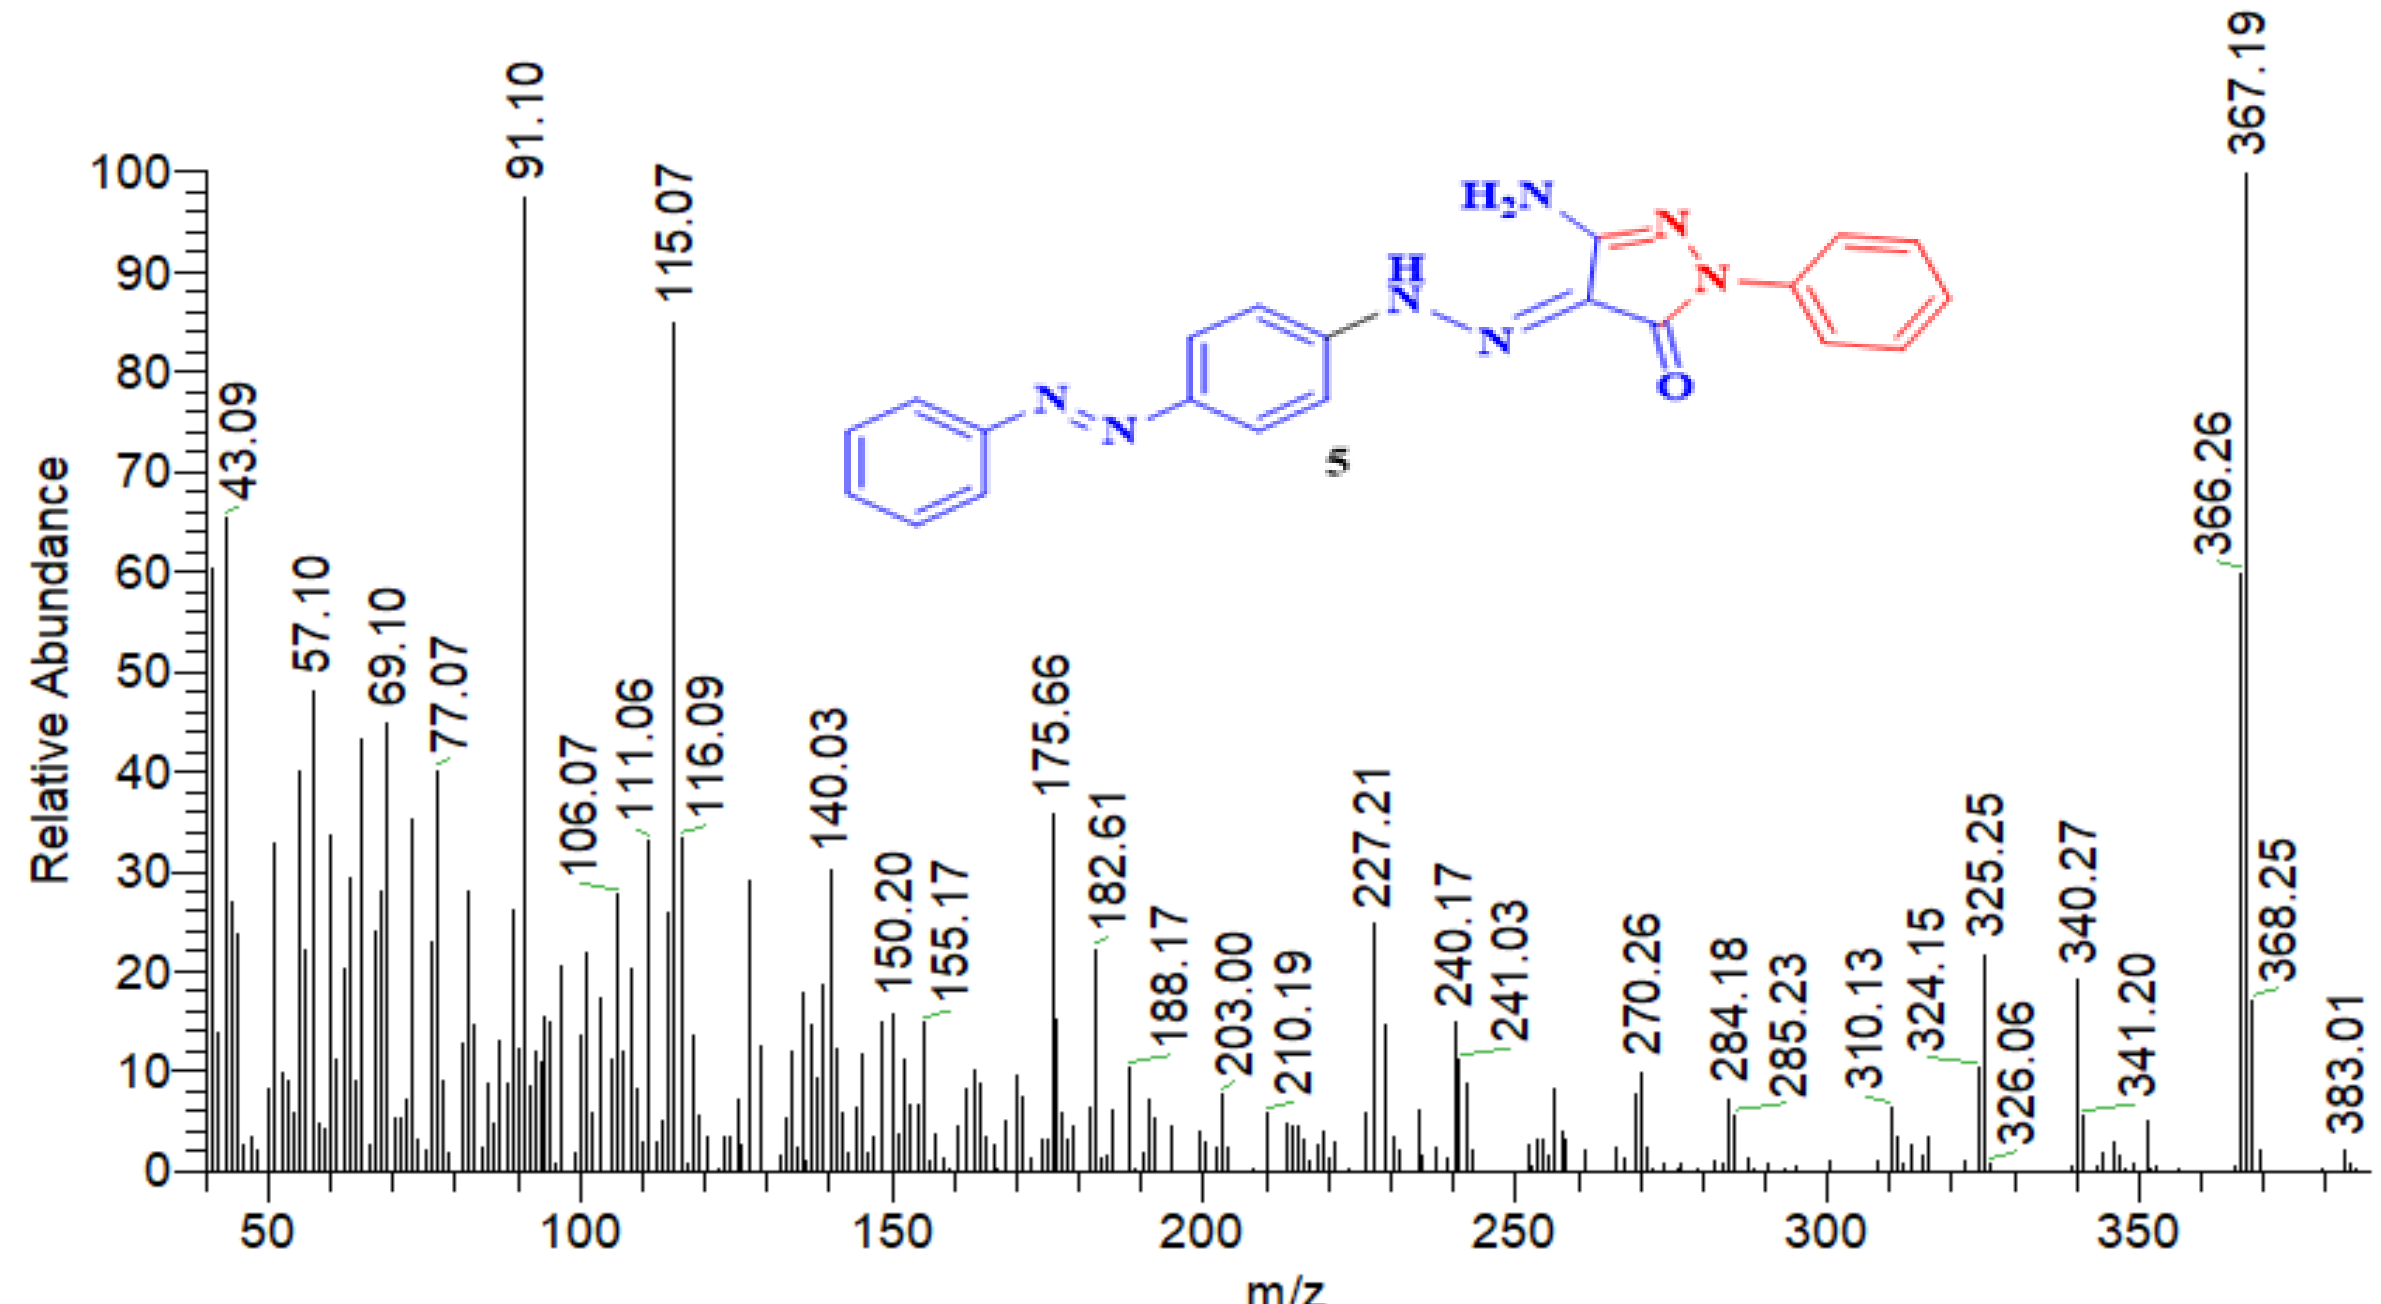

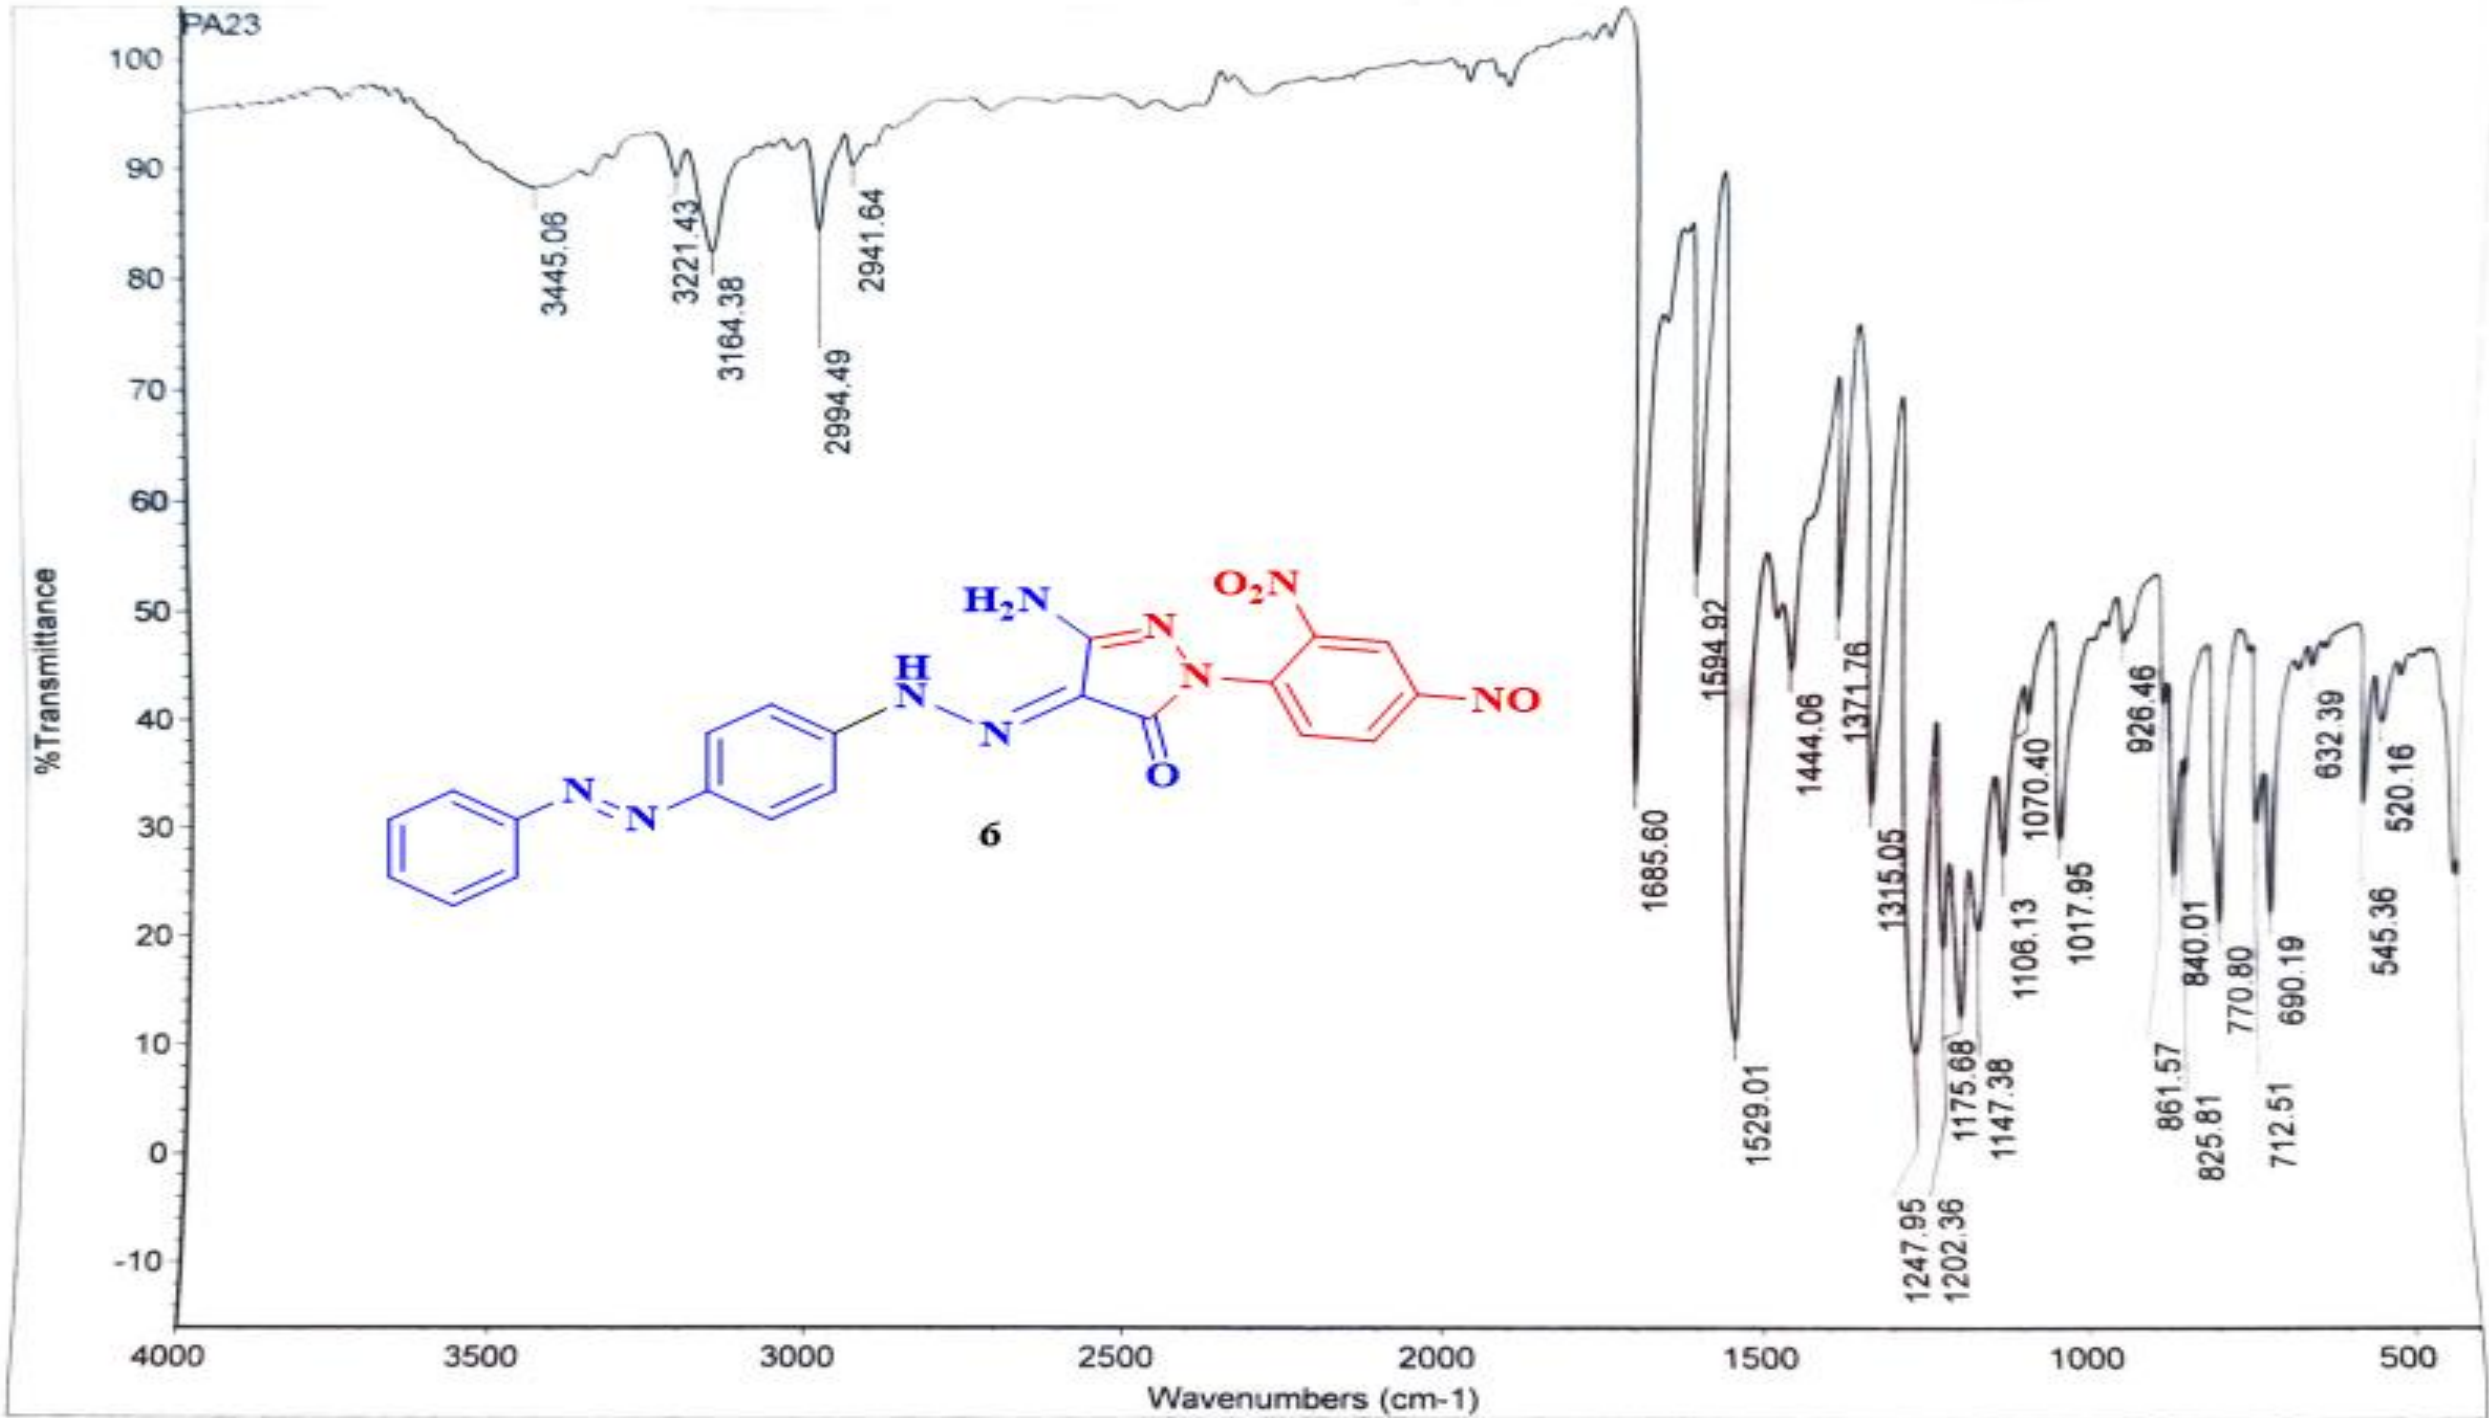

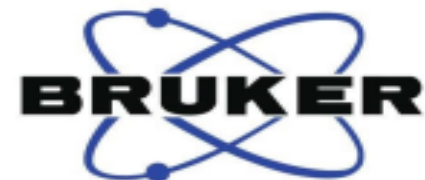

Current Data Parameters  
NAME nour eldin-PA23  
EXPNO 1  
PROCNO 1

F2 - Acquisition Parameters  
Date\_ 20230313  
Time 15.53  
INSTRUM spect  
PROBHD 5 mm PABBO BB/  
PULPROG zg30  
TD 65536  
SOLVENT DMSO  
NS 128  
DS 2  
SWH 8012.820 Hz  
FIDRES 0.122266 Hz  
AQ 4.0894465 sec  
RG 205.37  
DW 62.400 usec  
DE 6.50 usec  
TE 300.0 K  
D1 1.0000000 sec  
TDO 1

----- CHANNEL f1 -----  
SF01 400.1524711 MHz  
NUC1 1H  
P1 12.00 usec  
PLW1 18.00000000 W

F2 - Processing parameters  
SI 65536  
SF 400.1500000 MHz  
WDW EM  
SSB 0  
LB 0.30 Hz  
GB 0  
PC 1.00

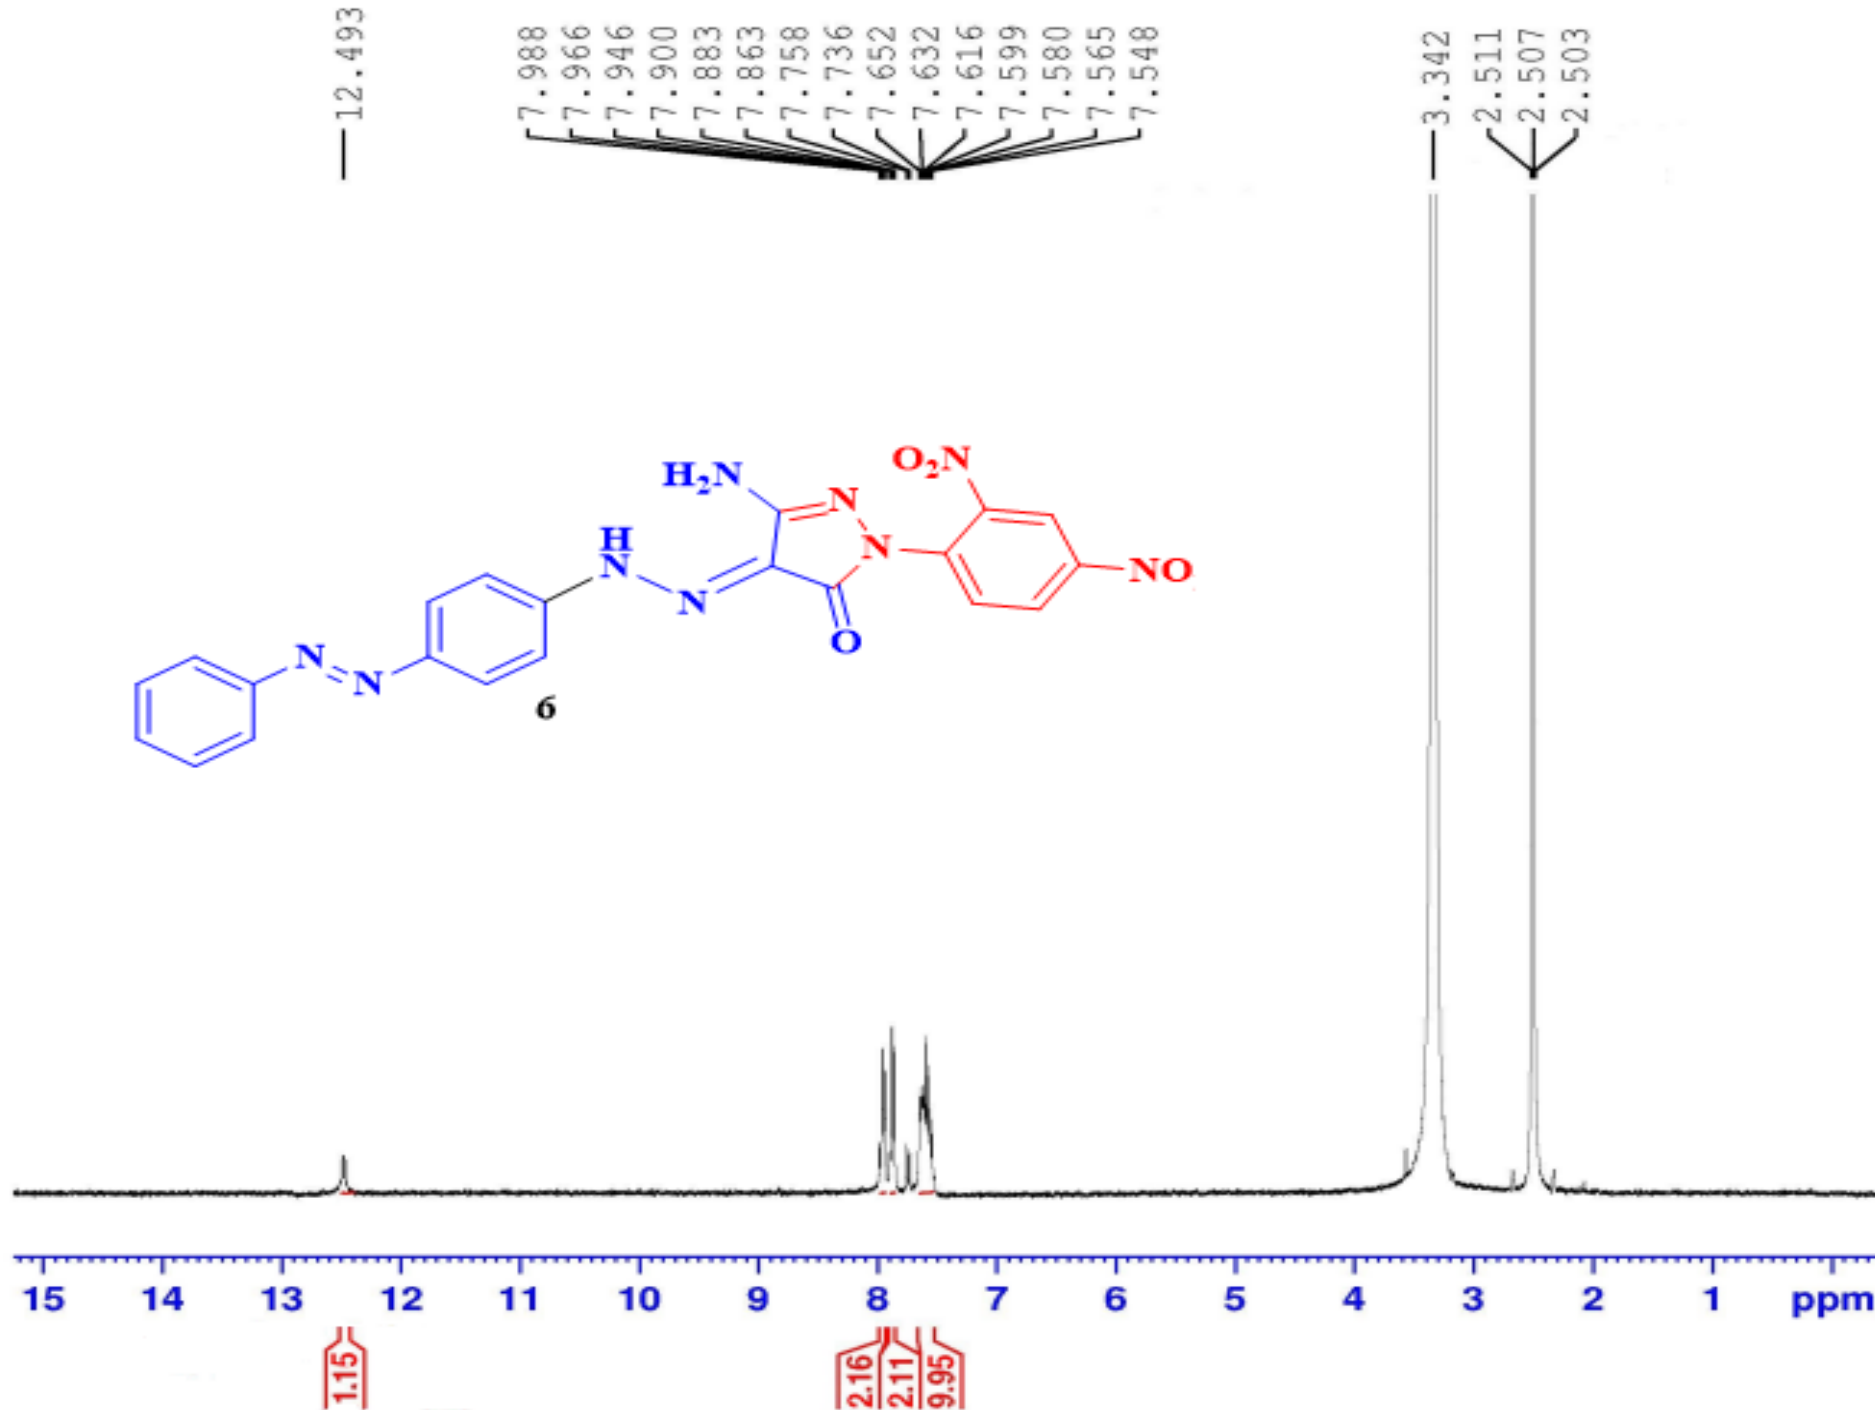



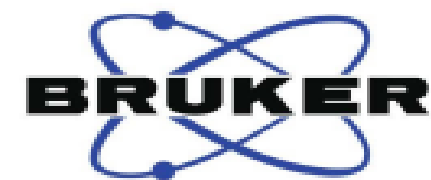

Current Data Parameters  
NAME nour eldin-PA23  
EXPNO 2  
PROCNO 1

F2 - Acquisition Parameters  
Date\_ 20230316  
Time 10.53  
INSTRUM spect  
PROBHD 5 mm PABBO BB/  
PULPROG zgpg30  
ID 65536  
SOLVENT DMSO  
NS 1534  
DS 4  
SWH 24038.461 Hz  
FIDRES 0.366798 Hz  
AQ 1.3631488 sec  
RG 205.37  
DW 20.800 usec  
DE 6.50 usec  
TE 300.0 K  
D1 2.00000000 sec  
D11 0.03000000 sec  
ID0 1

----- CHANNEL f1 -----  
SFO1 100.6278588 MHz  
NUC1 13C  
P1 10.00 usec  
PLW1 47.00000000 W

----- CHANNEL f2 -----  
SFO2 400.1516006 MHz  
NUC2 1H  
CPDPRG(2) waltz16  
PCPD2 90.00 usec  
PLW2 18.00000000 W  
PLW12 0.34722000 W  
PLW13 0.28125000 W

F2 - Processing parameters  
SI 32768  
SF 100.6177975 MHz  
WDW EM  
SSB 0  
LB 1.00 Hz  
GB 0  
PC 1.40

161.44  
155.31  
152.52  
149.04  
145.81  
141.96  
138.52  
131.63  
129.88  
124.67  
122.94  
122.86  
117.31  
112.13  
108.46  
105.52

40.60  
40.39  
40.19  
39.98  
39.77  
39.56  
39.35

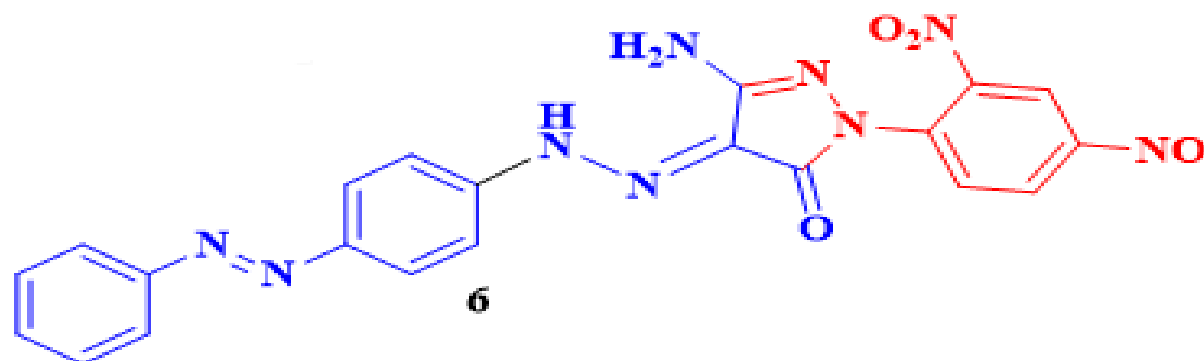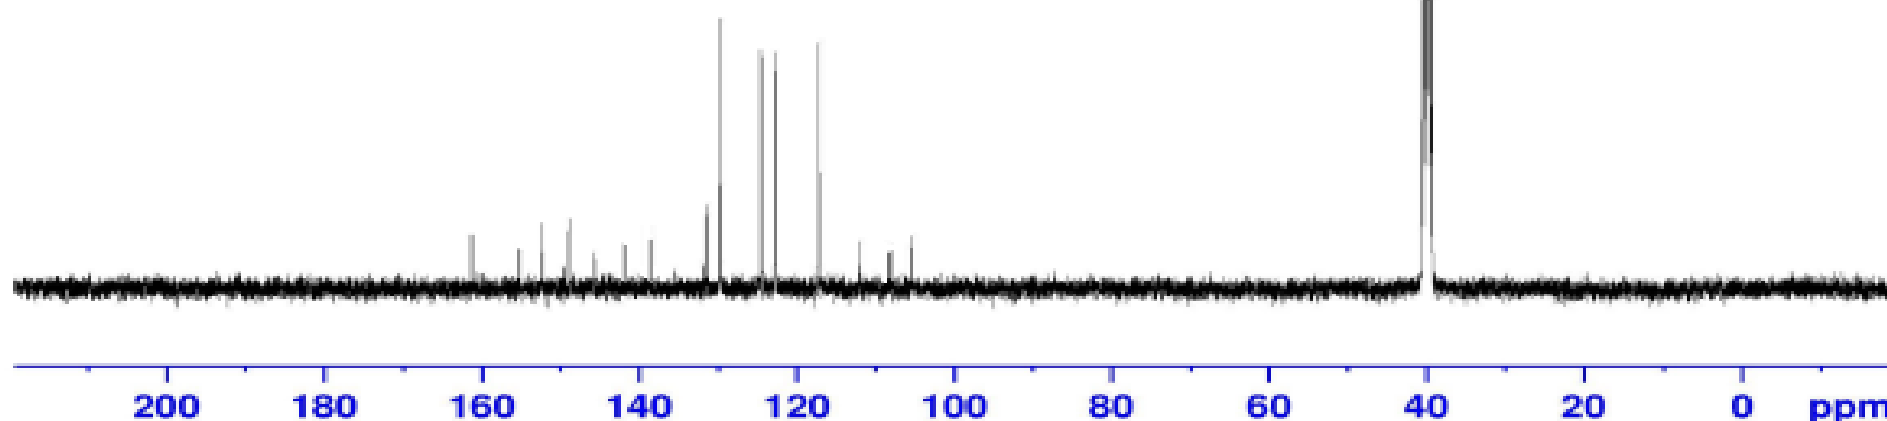

Kerles-PA23 #36-40 RT: 0.62-0.69 AV: 5 SB: 26 1.21-1.34 , 0.87-1.14 NL: 4.01E3  
T: {0,0} + c EI Full ms [40.00-1000.00]

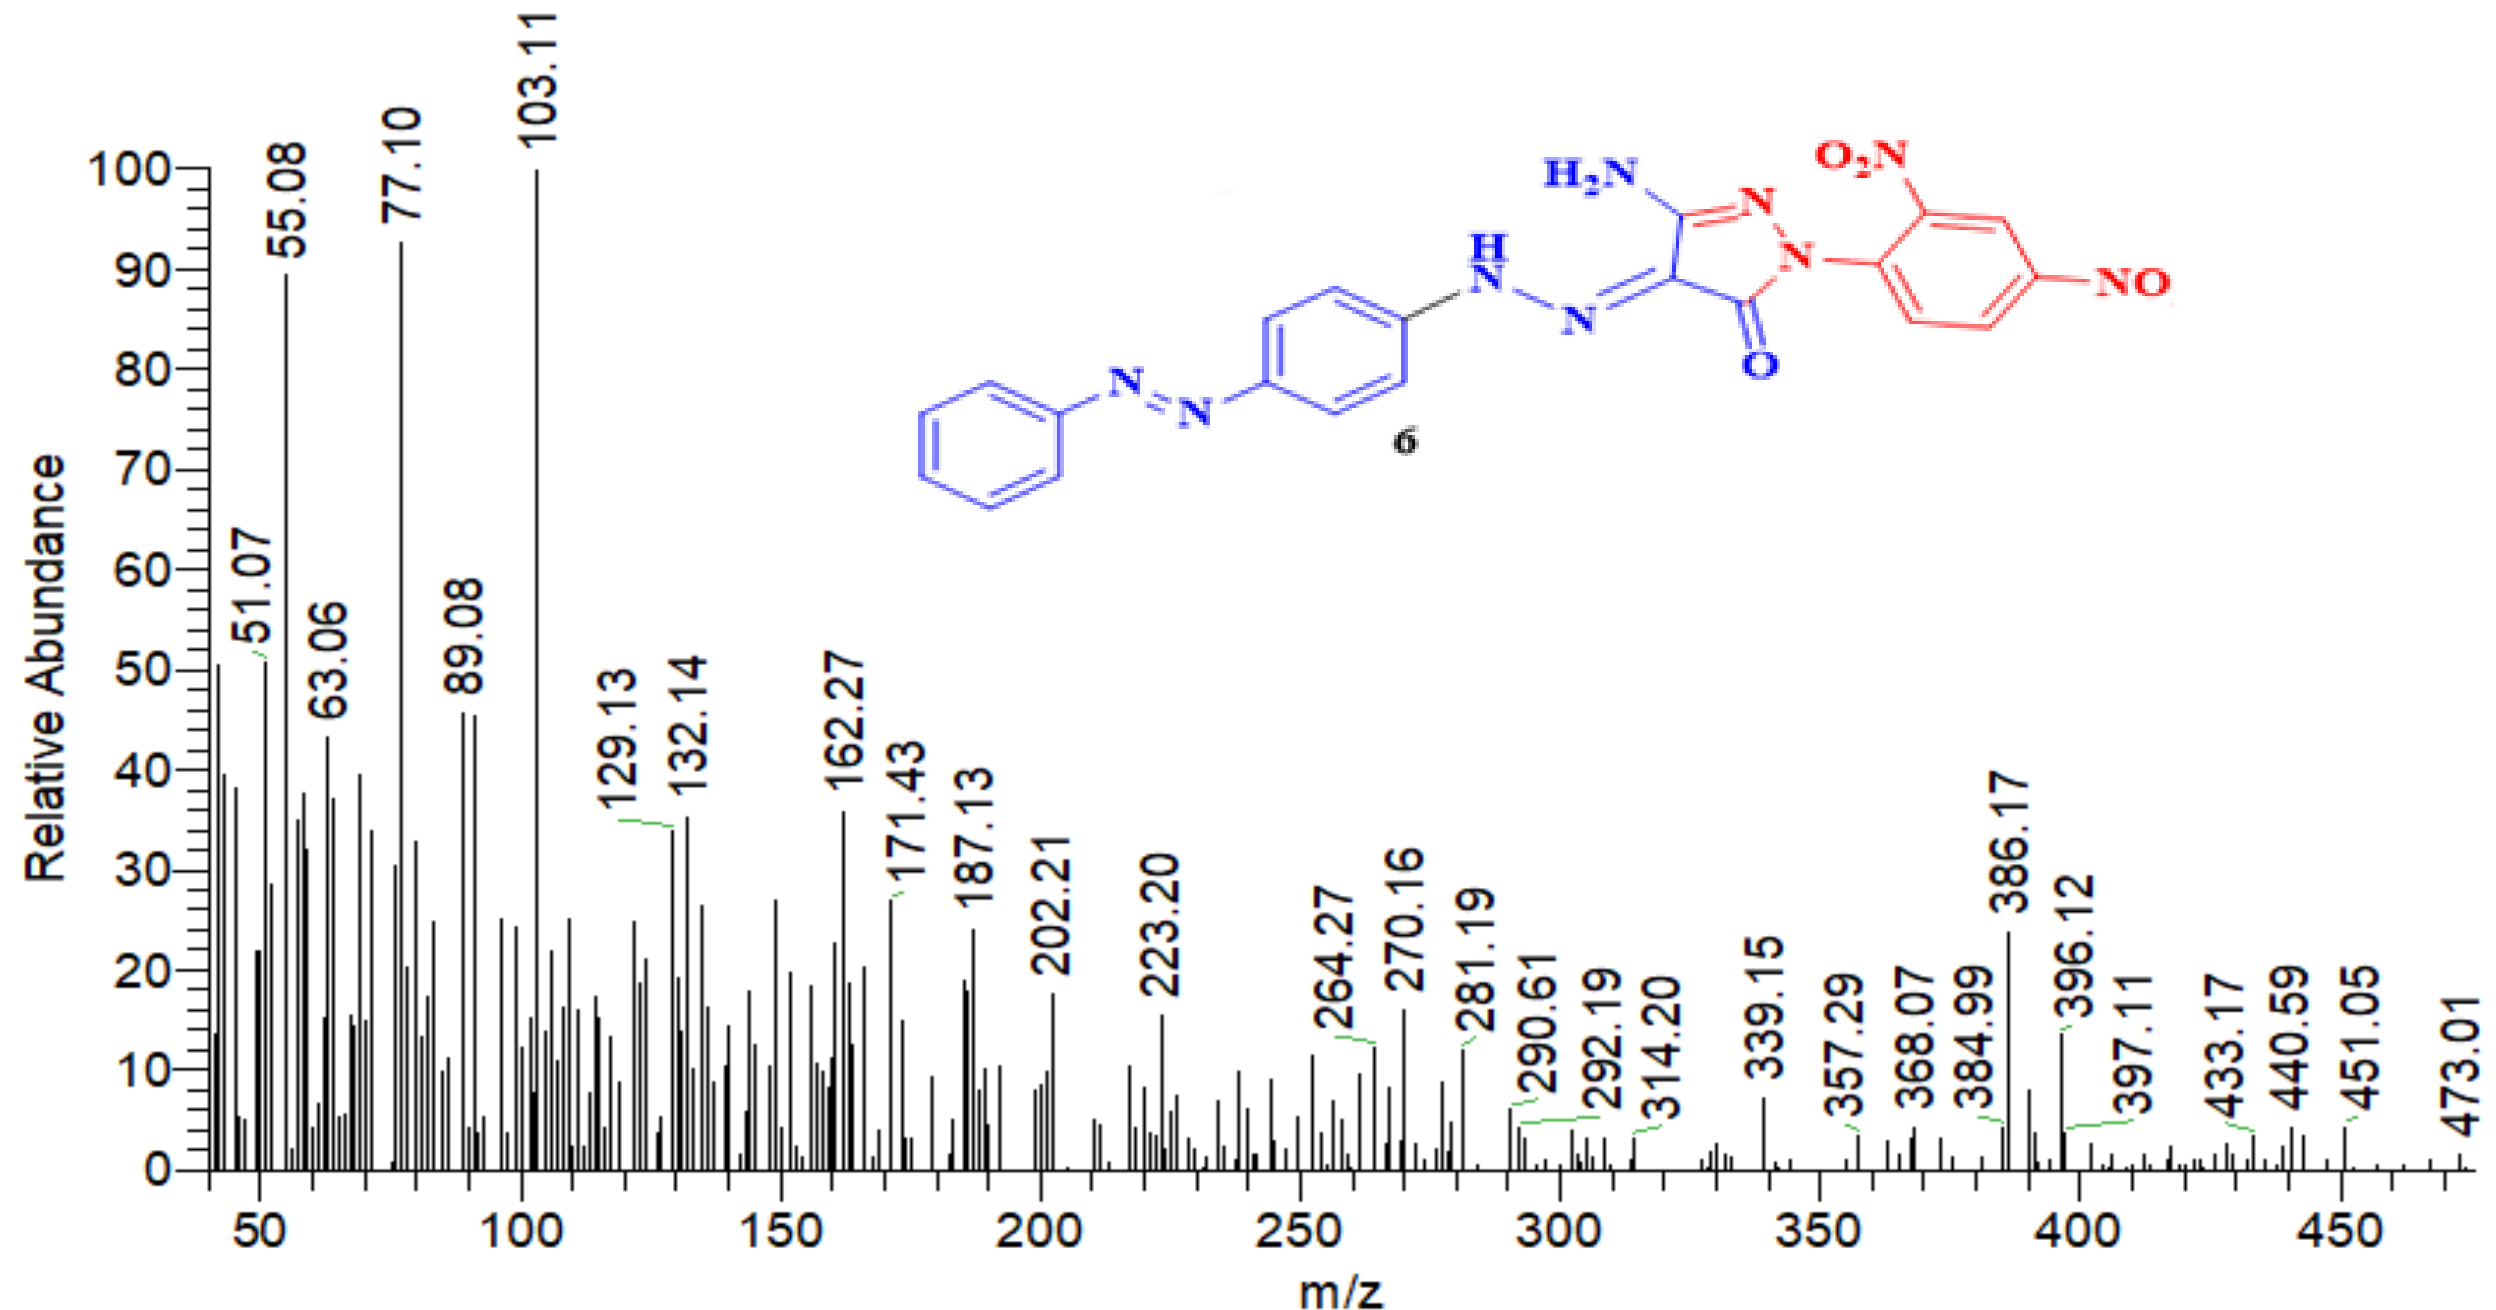

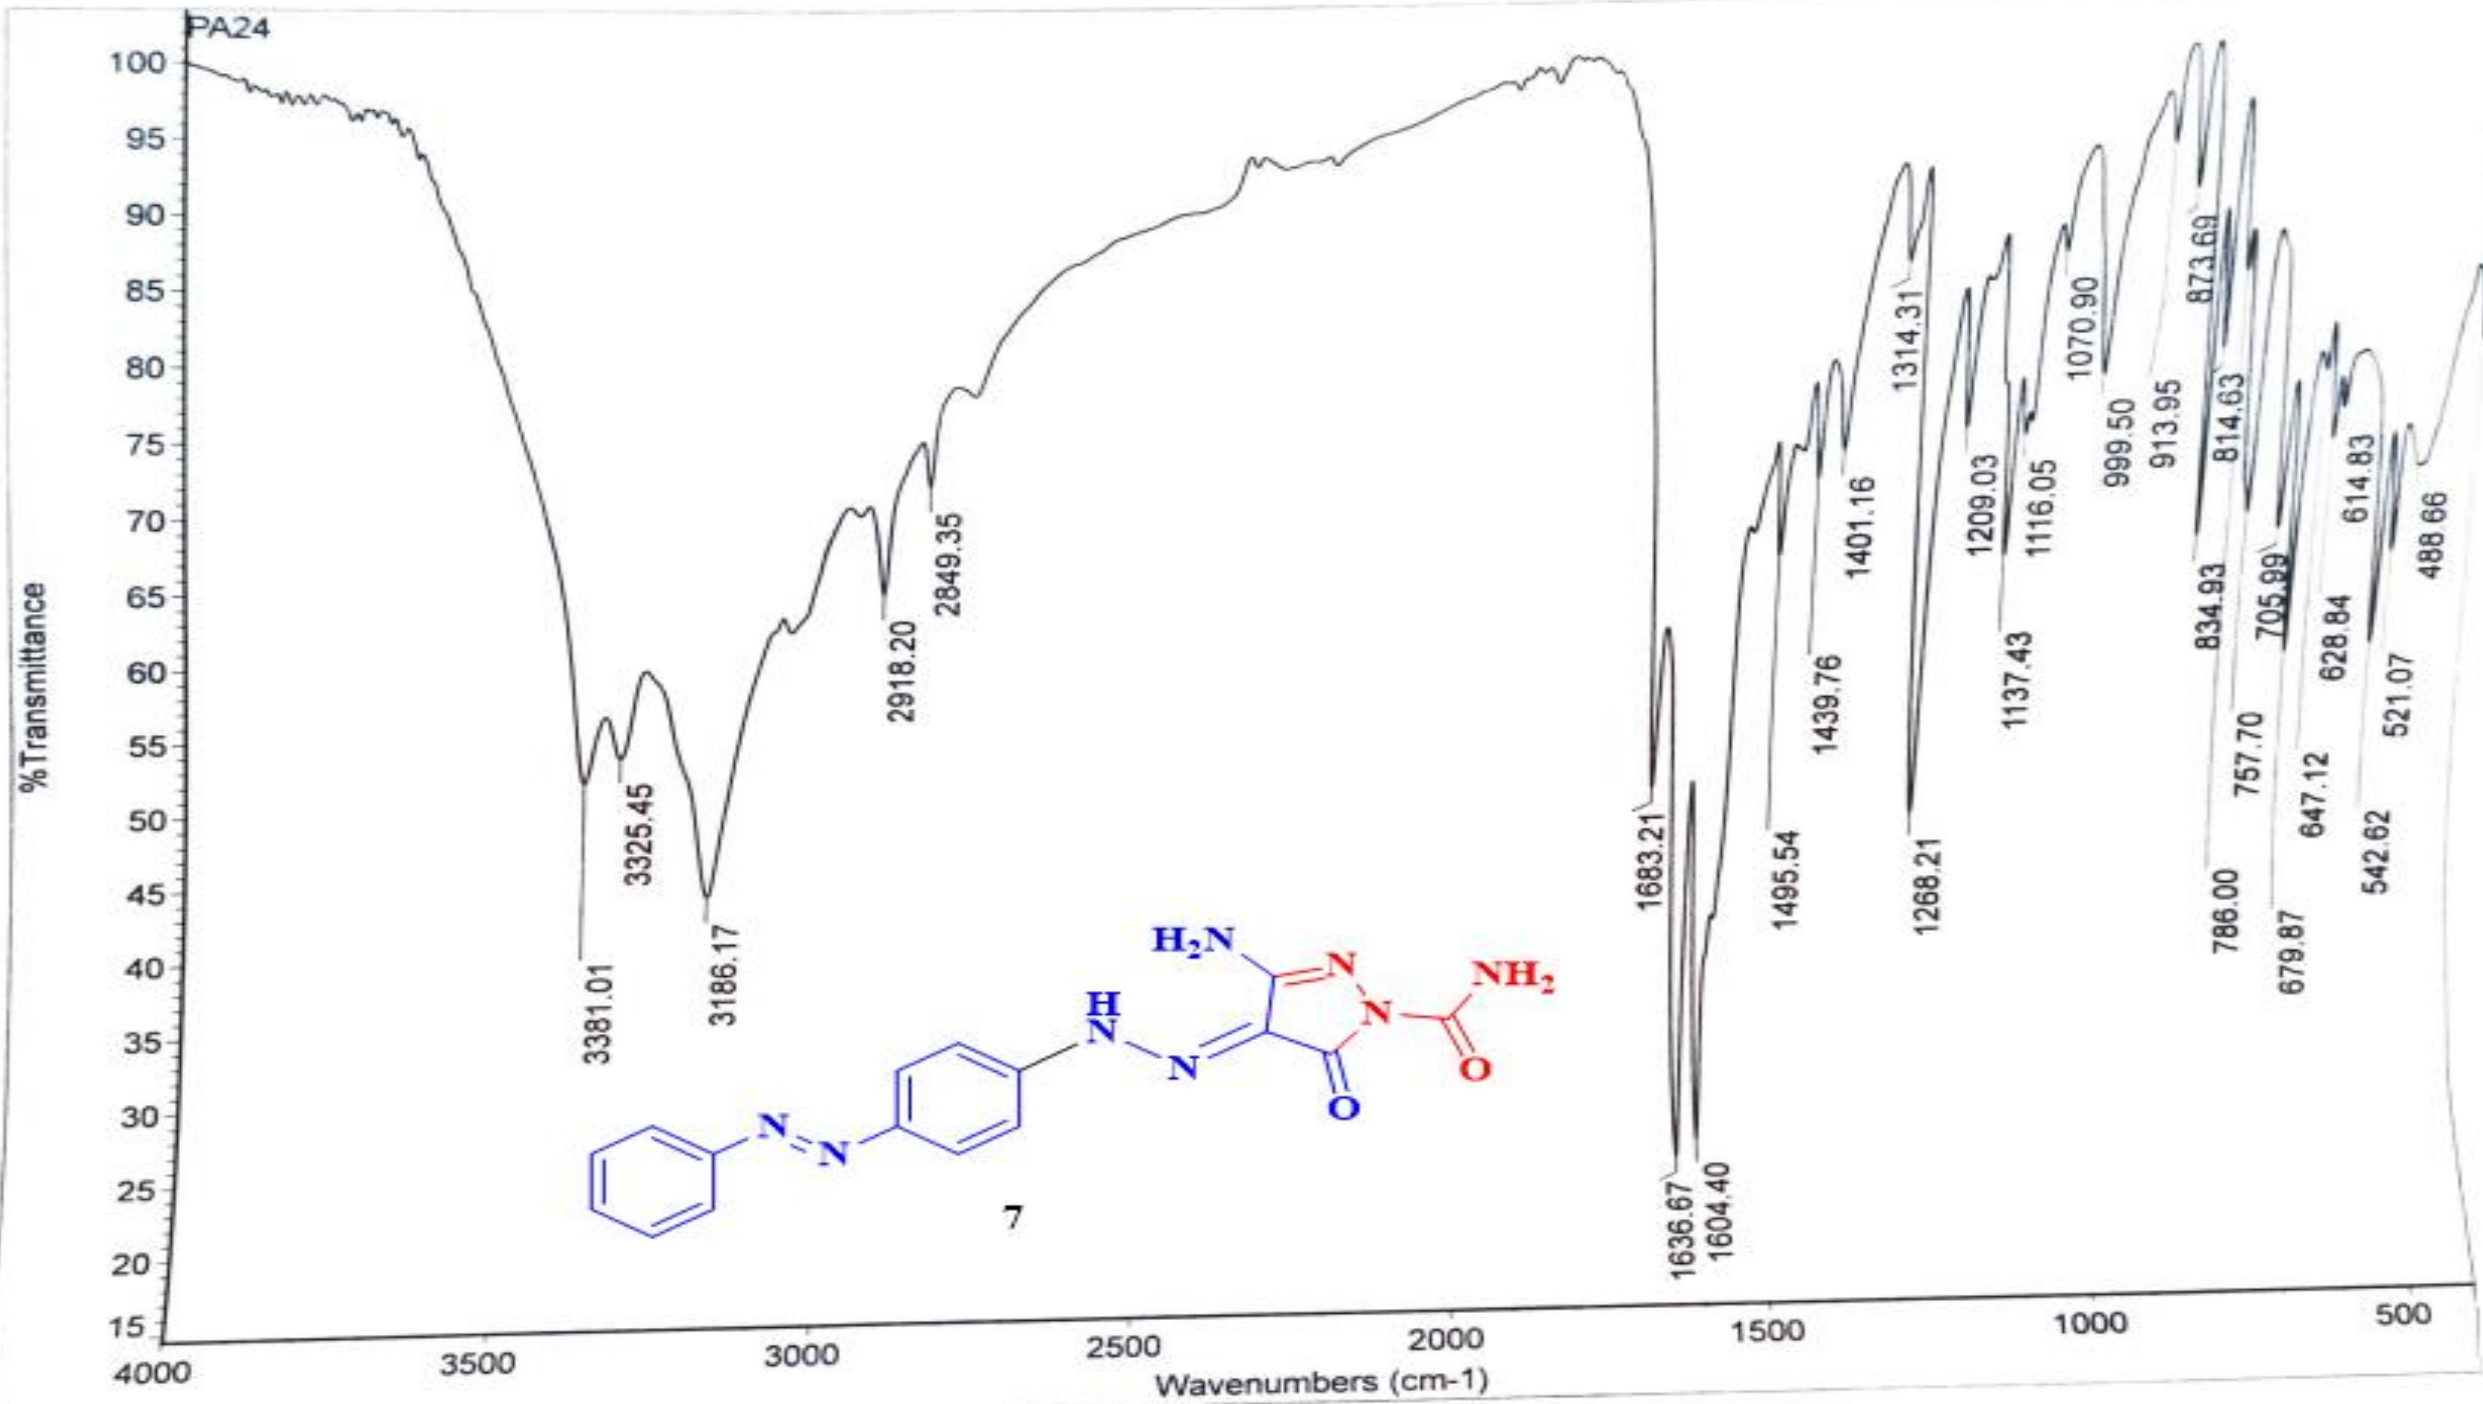

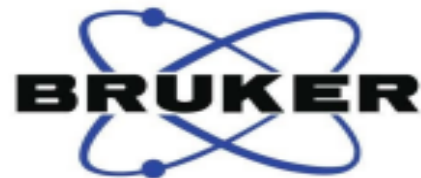

Current Data Parameters  
NAME nour eldin-PA24  
EXPNO 1  
PROCNO 1

F2 - Acquisition Parameters  
Date\_ 20230313  
Time 13.28  
INSTRUM spect  
PROBHD 5 mm PABBO BB/  
PULPROG zg30  
TD 65536  
SOLVENT DMSO  
NS 83  
DS 2  
SWH 8012.820 Hz  
FIDRES 0.122266 Hz  
AQ 4.0894465 sec  
RG 205.37  
DW 62.400 usec  
DE 6.50 usec  
TE 300.0 K  
D1 1.00000000 sec  
TDO 1

----- CHANNEL f1 -----  
SFO1 400.1524711 MHz  
NUC1 1H  
P1 12.00 usec  
PLW1 18.00000000 W

F2 - Processing parameters  
SI 65536  
SF 400.1500000 MHz  
WDW EM  
SSB 0  
LB 0.30 Hz  
GB 0  
PC 1.00

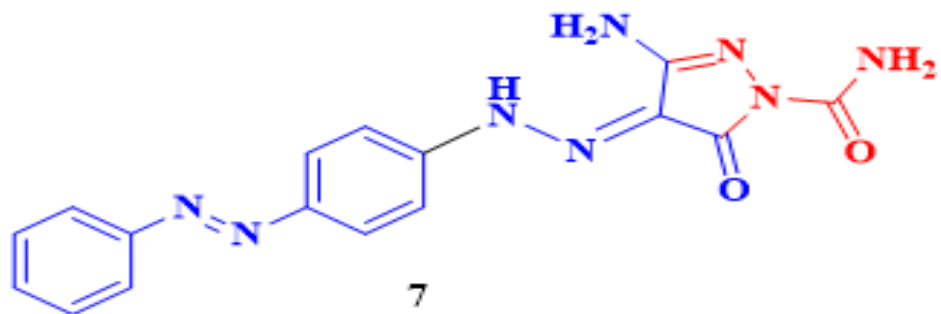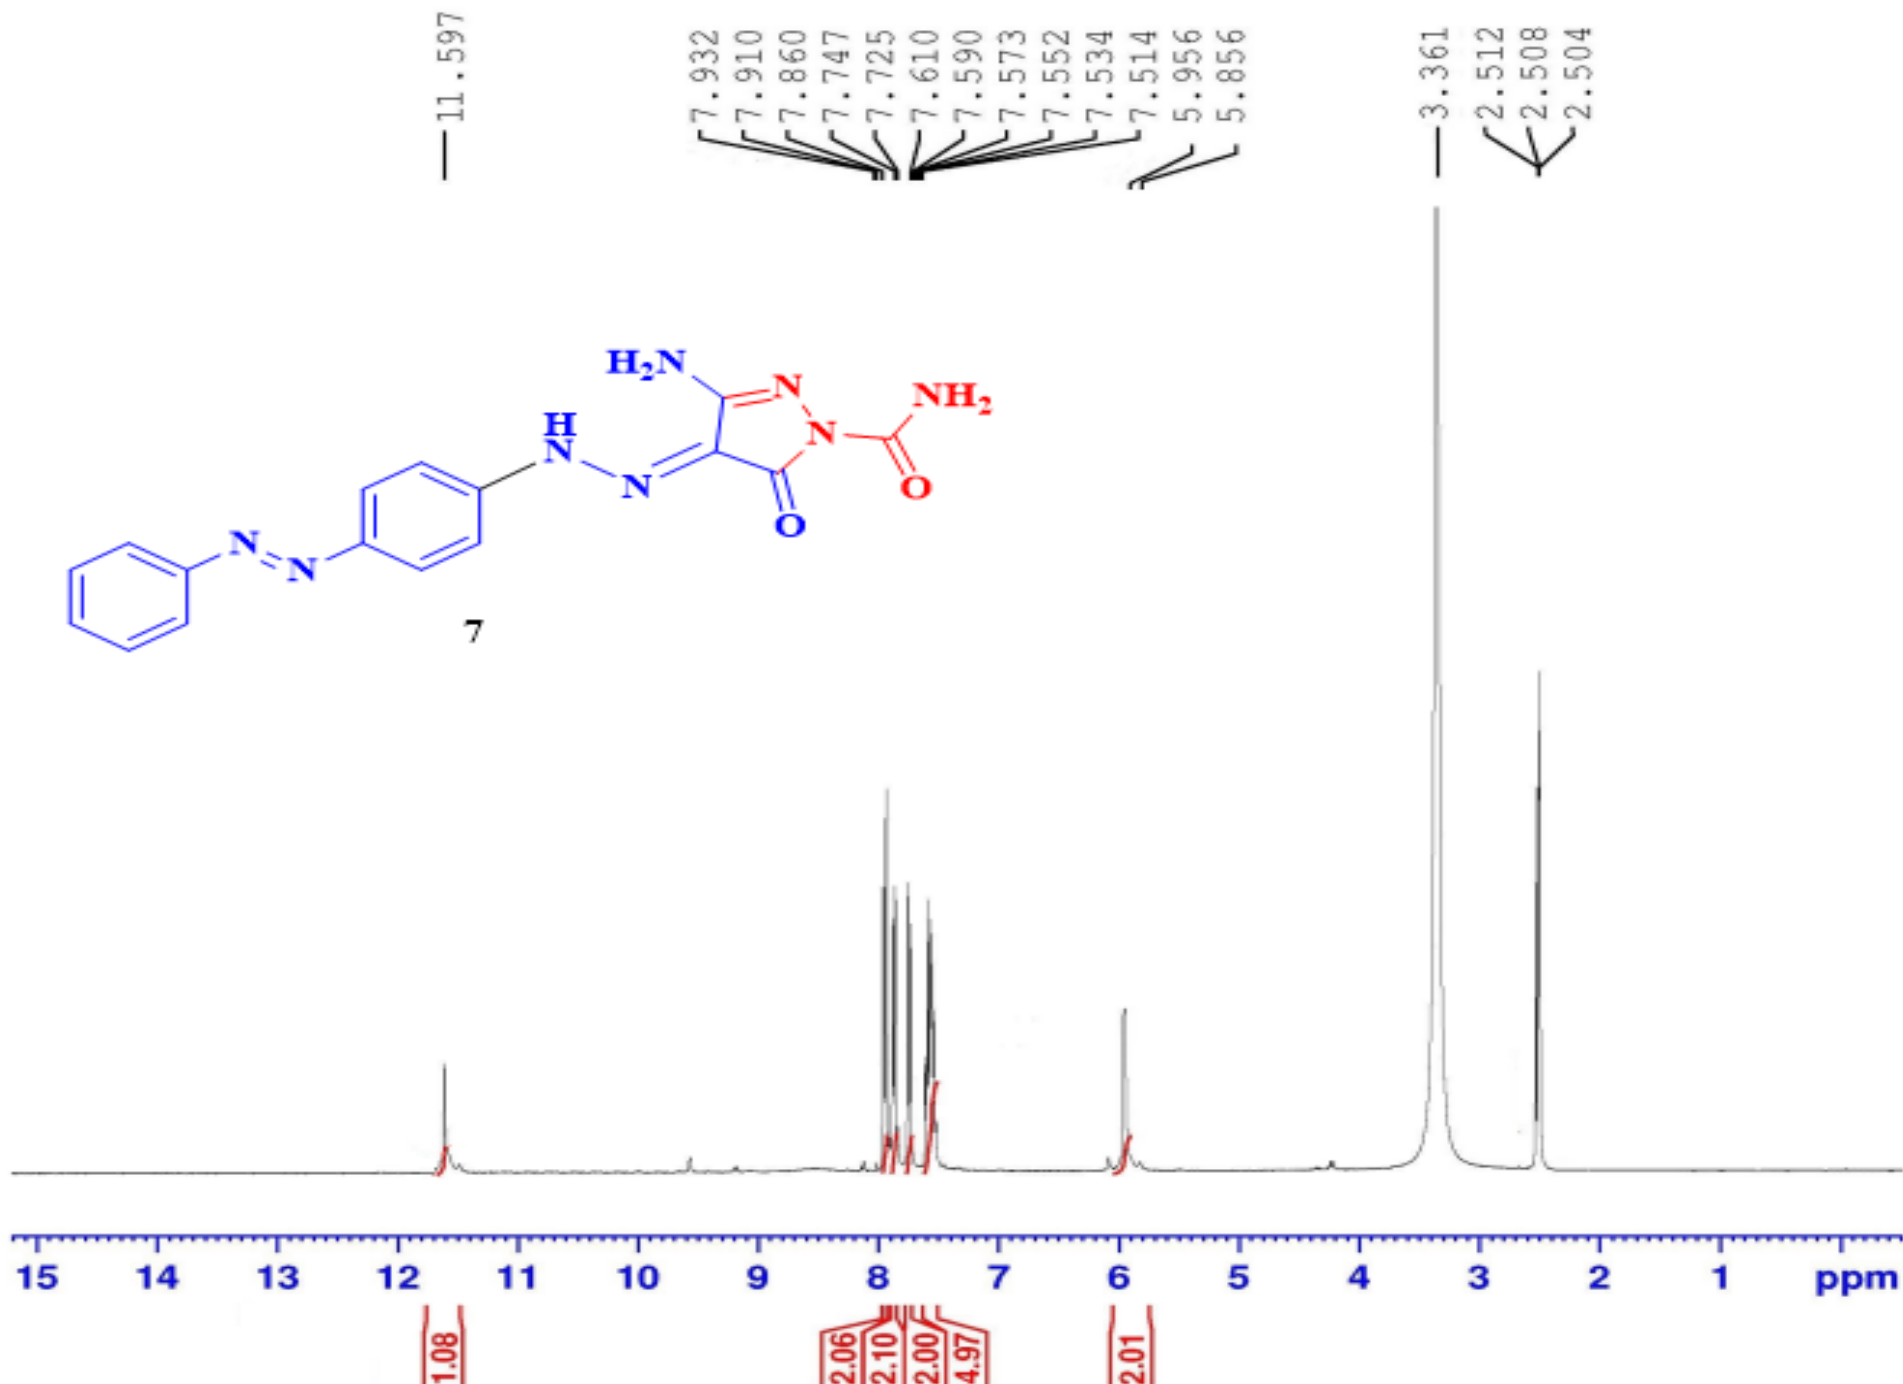

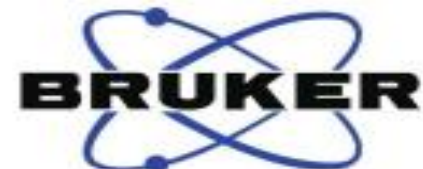

Current Data Parameters  
NAME neur eldin-PA24  
EXPNO 2  
PROCNO 1

F2 - Acquisition Parameters  
Date\_ 20230313  
Time 15.27  
INSTRUM spect  
PROBHD 5 mm PABBO BB/  
PULPROG zgpg30  
ID 65536  
SOLVENT DMSO  
NS 2000  
DS 4  
SWH 24038.461 Hz  
FIDRES 0.366798 Hz  
AQ 1.3631488 sec  
RG 205.37  
DW 20.800 usec  
DE 6.50 usec  
TE 300.0 K  
D1 2.00000000 sec  
D11 0.03000000 sec  
ID0 1

----- CHANNEL f1 -----  
SFO1 100.6278588 MHz  
NUC1 13C  
P1 10.00 usec  
PLW1 47.00000000 W

----- CHANNEL f2 -----  
SFO2 400.1516006 MHz  
NUC2 1H  
CPDPRG(2) waltz16  
PCPD2 90.00 usec  
PLW2 18.00000000 W  
PLW12 0.34722000 W  
PLW13 0.28125000 W

F2 - Processing parameters  
SI 32768  
SF 100.6177975 MHz  
WDW EM  
SSB 0  
LB 1.00 Hz  
GB 0  
PC 1.40

159.99  
158.81  
152.55  
150.30  
148.74  
145.09  
131.88  
129.91  
125.93  
124.73  
122.85  
116.15

40.59  
40.39  
40.18  
39.97  
39.76  
39.55  
39.34

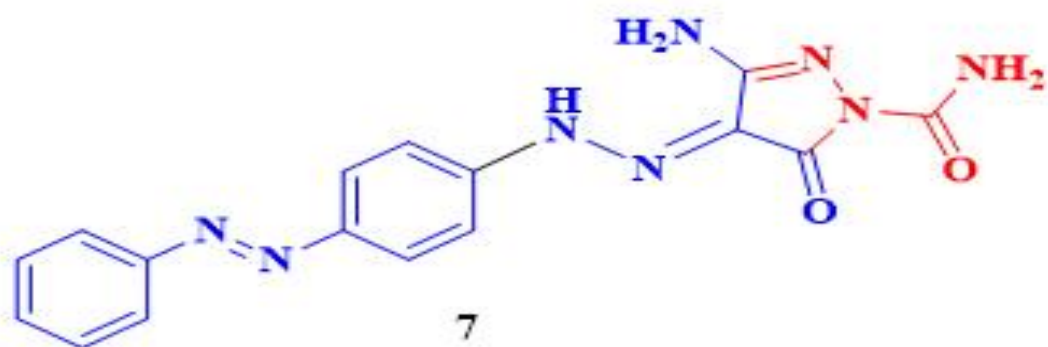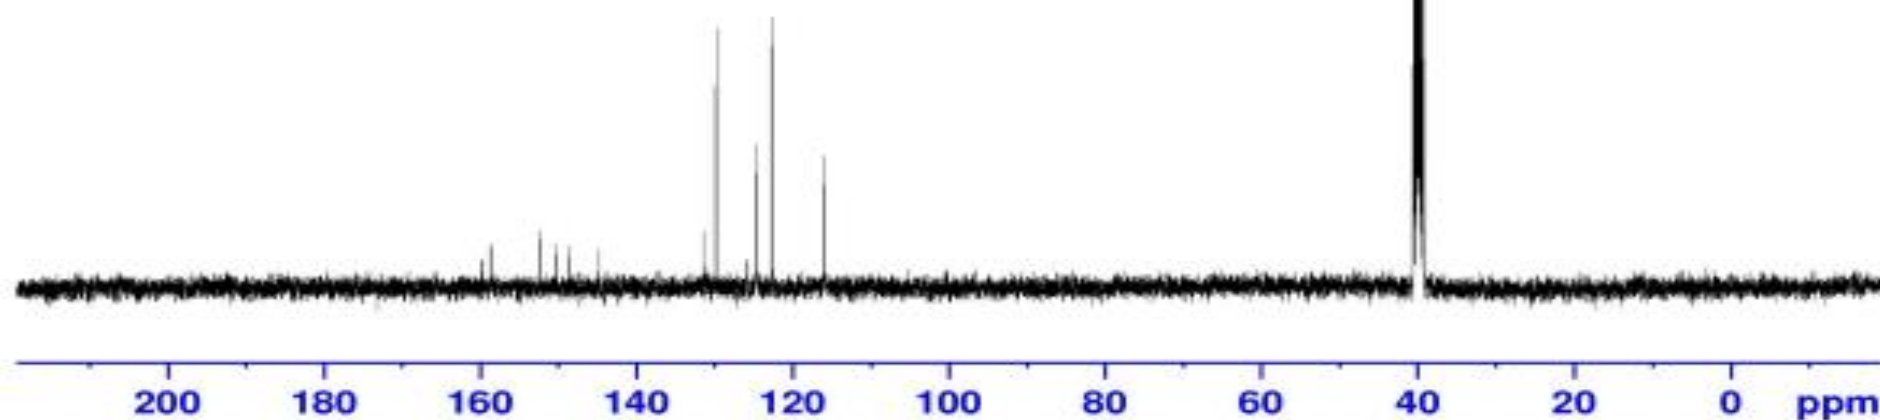

kerles-PA24 #296 RT: 4.97 AV: 1 SB: 26 1.21-1.34 , 0.87-1.14 NL: 7.20E2

T: {0,0} + c EI Full ms [40.00-1000.00]

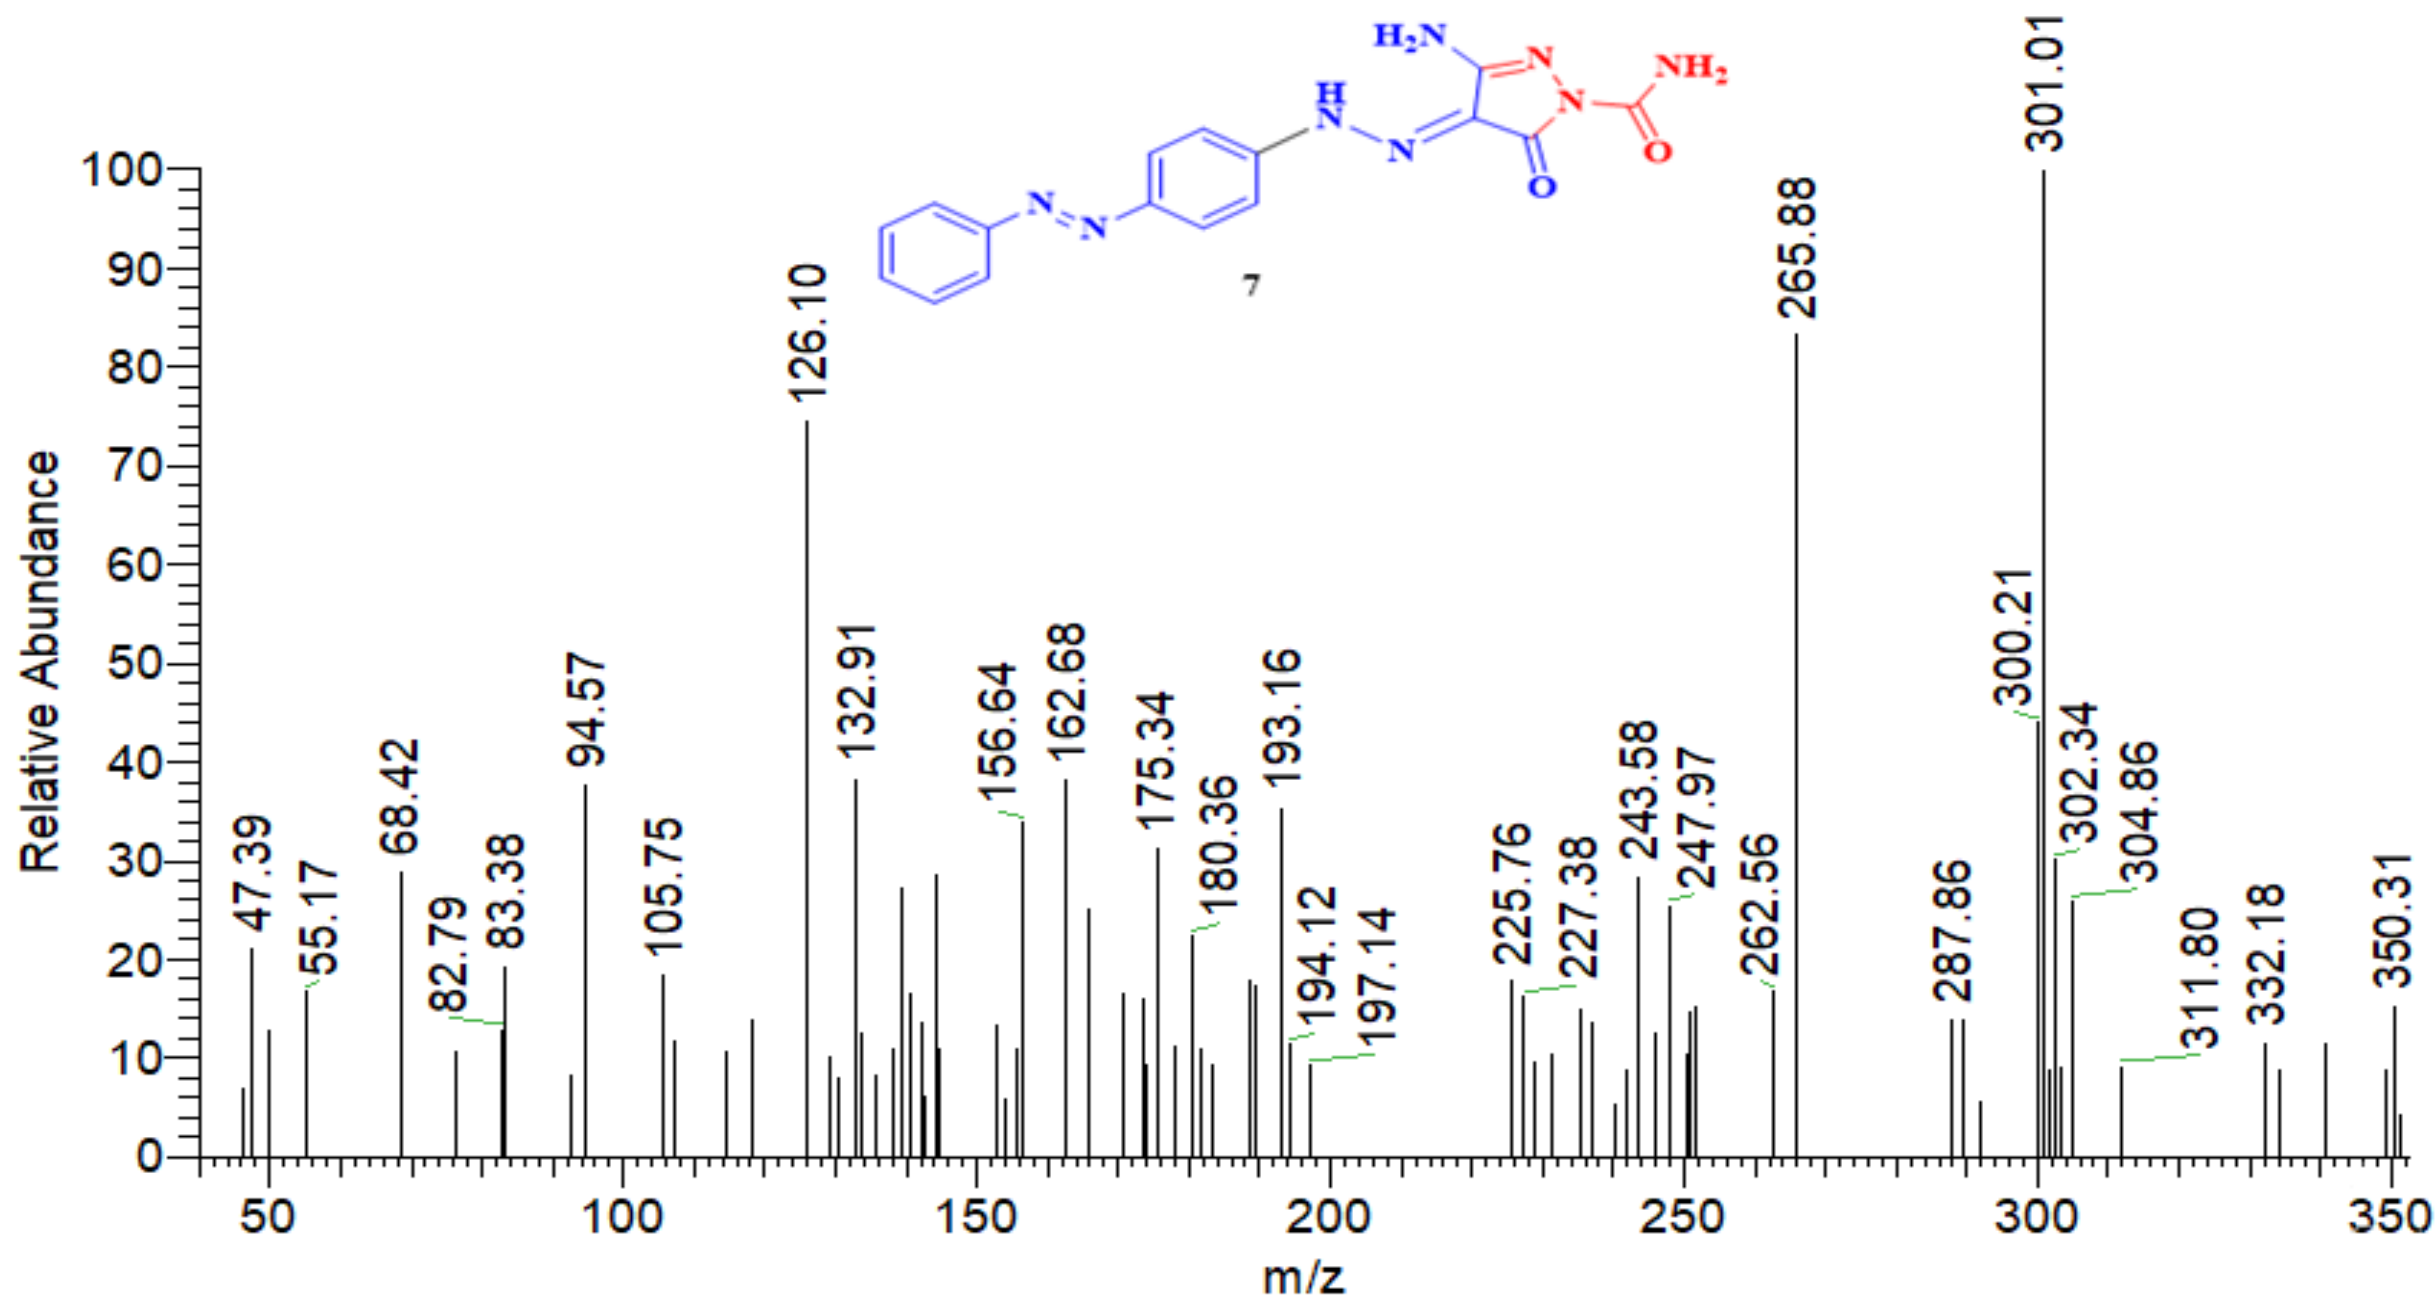

% Transmittance

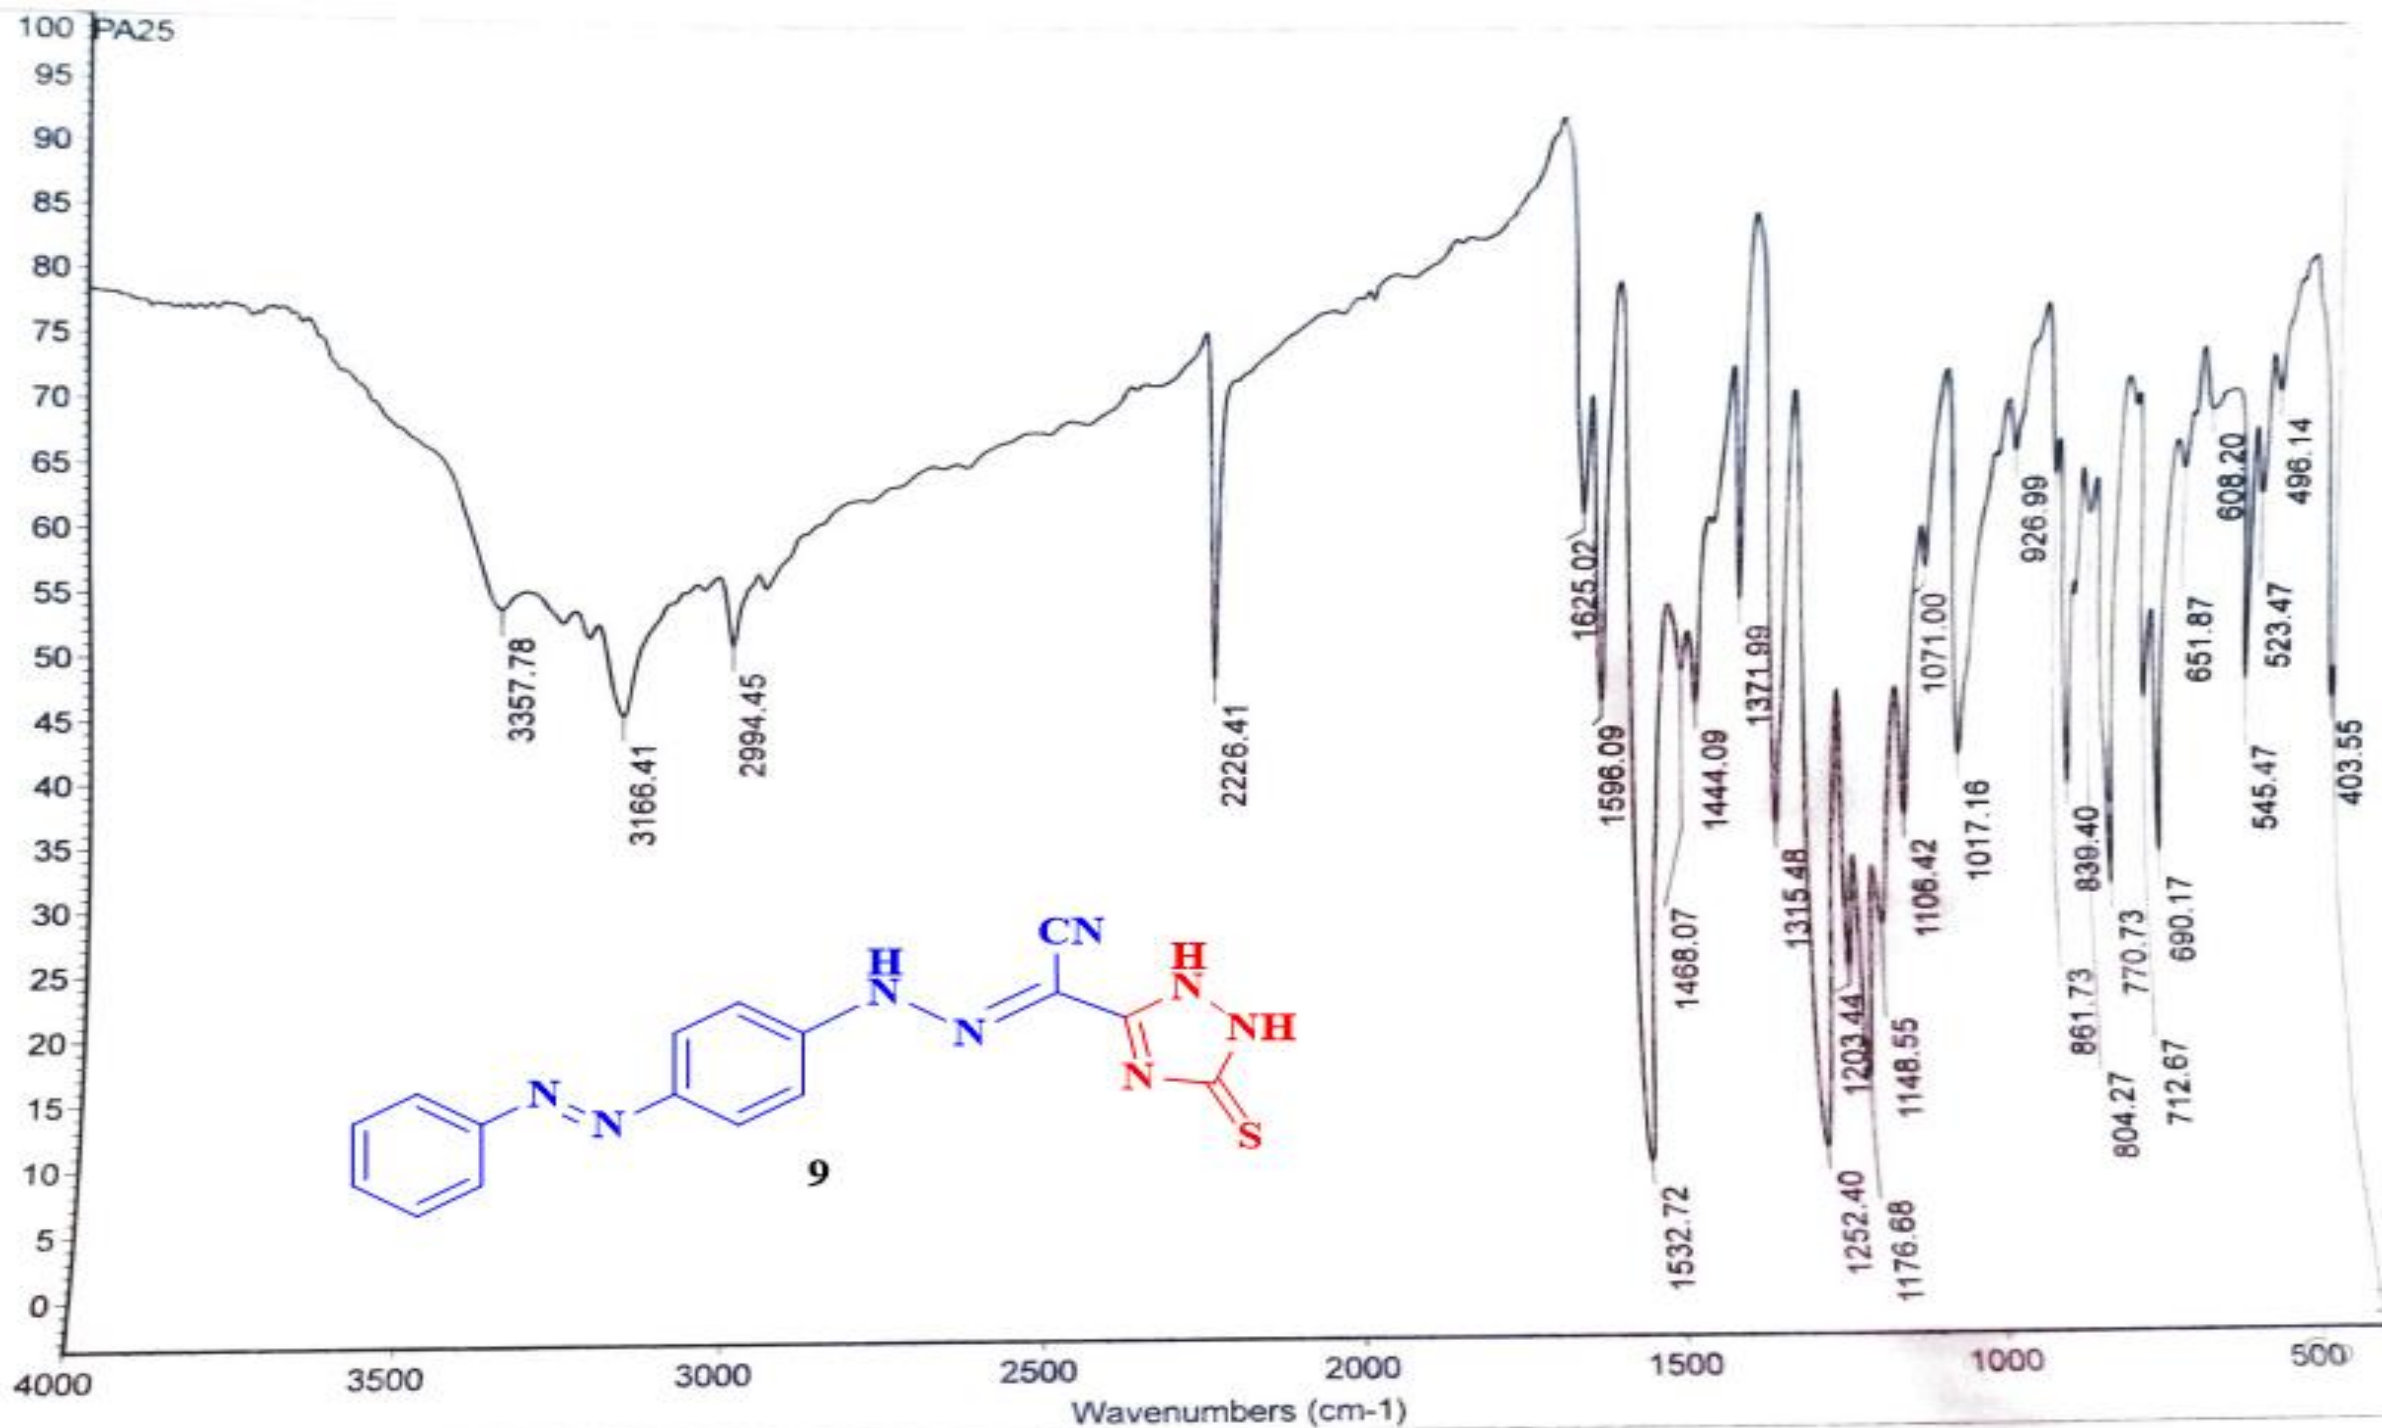

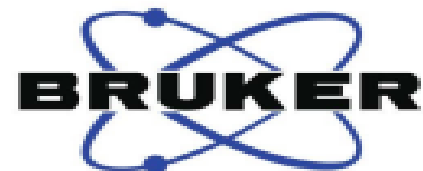

Current Data Parameters  
NAME        nour eldin-PA25  
EXPNO       1  
PROCNO      1

F2 - Acquisition Parameters  
Date\_       20230313  
Time        17.29  
INSTRUM     spect  
PROBHD      5 mm PABBO BB/  
PULPROG     zg30  
ID           65536  
SOLVENT     DMSO  
NS           128  
DS           2  
SWH          8012.820 Hz  
FIDRES      0.122266 Hz  
AQ           4.0894465 sec  
RG           205.37  
DW           62.400 usec  
DE           6.50 usec  
TE           300.0 K  
D1           1.00000000 sec  
TD0          1

----- CHANNEL f1 -----  
SFO1         400.1524711 MHz  
NUC1         1H  
P1            12.00 usec  
PLW1         18.00000000 W

F2 - Processing parameters  
SI           65536  
SF           400.1500000 MHz  
WDW          EM  
SSB          0  
LB            0.30 Hz  
GB           0  
PC            1.00

8.618  
7.987  
7.968  
7.946  
7.912  
7.899  
7.882  
7.864  
7.844  
7.757  
7.734  
7.655  
7.633  
7.616  
7.610  
7.599  
7.580  
7.565  
7.548  
7.185  
— 4.492  
— 3.344  
2.511  
2.507  
2.503

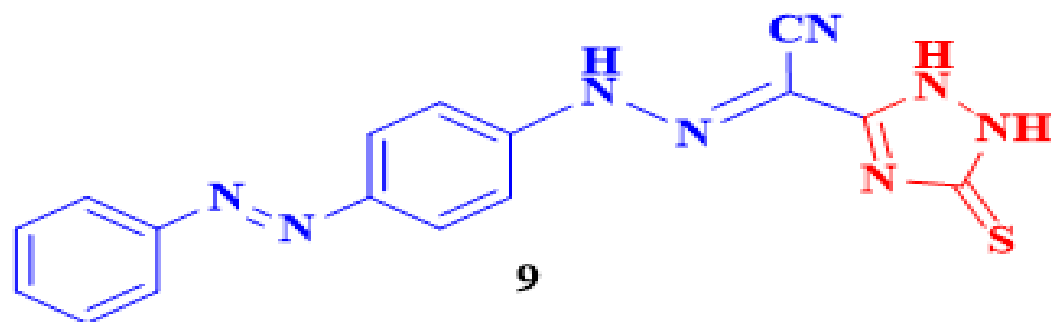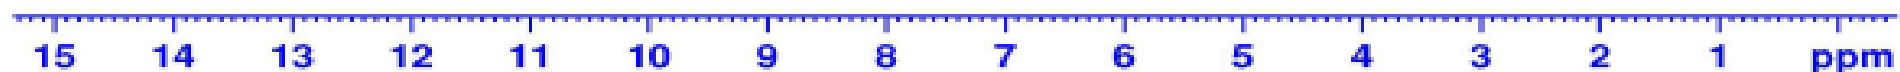

2.00  
2.02  
3.97  
2.95  
1.02



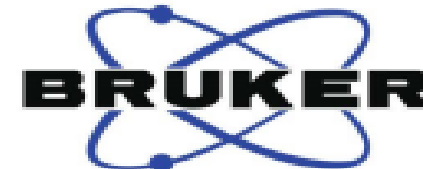

Current Data Parameters  
NAME        nour eldin-PA25  
EXPNO       2  
PROCNO      1

F2 - Acquisition Parameters  
Date\_       20230316  
Time        9.22  
INSTRUM     spect  
PROBHD      5 mm PABBO BB/  
PULPROG     zgpg30  
TD           65536  
SOLVENT     DMSO  
NS           954  
DS           4  
SWH          24038.461 Hz  
FIDRES       0.366798 Hz  
AQ           1.3631488 sec  
RG           205.37  
DW           20.800 usec  
DE           6.50 usec  
TE           300.0 K  
D1           2.00000000 sec  
D11          0.03000000 sec  
TDO          1

----- CHANNEL f1 -----  
SFO1        100.6278588 MHz  
NUC1        13C  
P1           10.00 usec  
PLW1        47.00000000 W

----- CHANNEL f2 -----  
SFO2        400.1516006 MHz  
NUC2        1H  
CPDPRG[2]   waltz16  
PCPD2       90.00 usec  
PLW2        18.00000000 W  
PLW12       0.34722000 W  
PLW13       0.28125000 W

F2 - Processing parameters  
SI           32768  
SF           100.6177975 MHz  
WDW          EM  
SSB          0  
LB           1.00 Hz  
GB           0  
PC           1.40

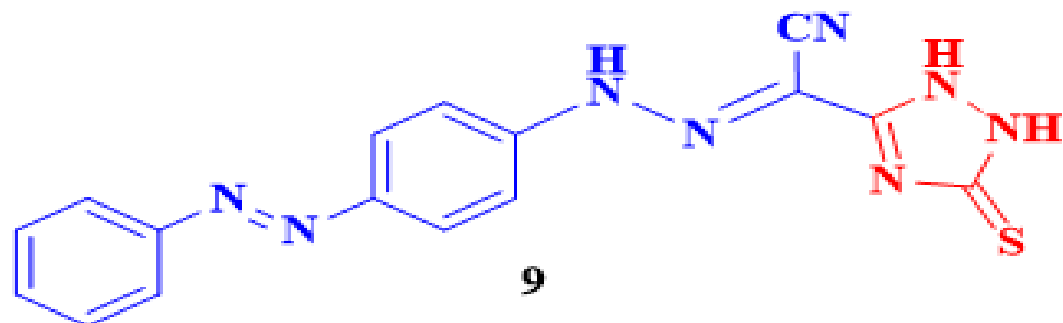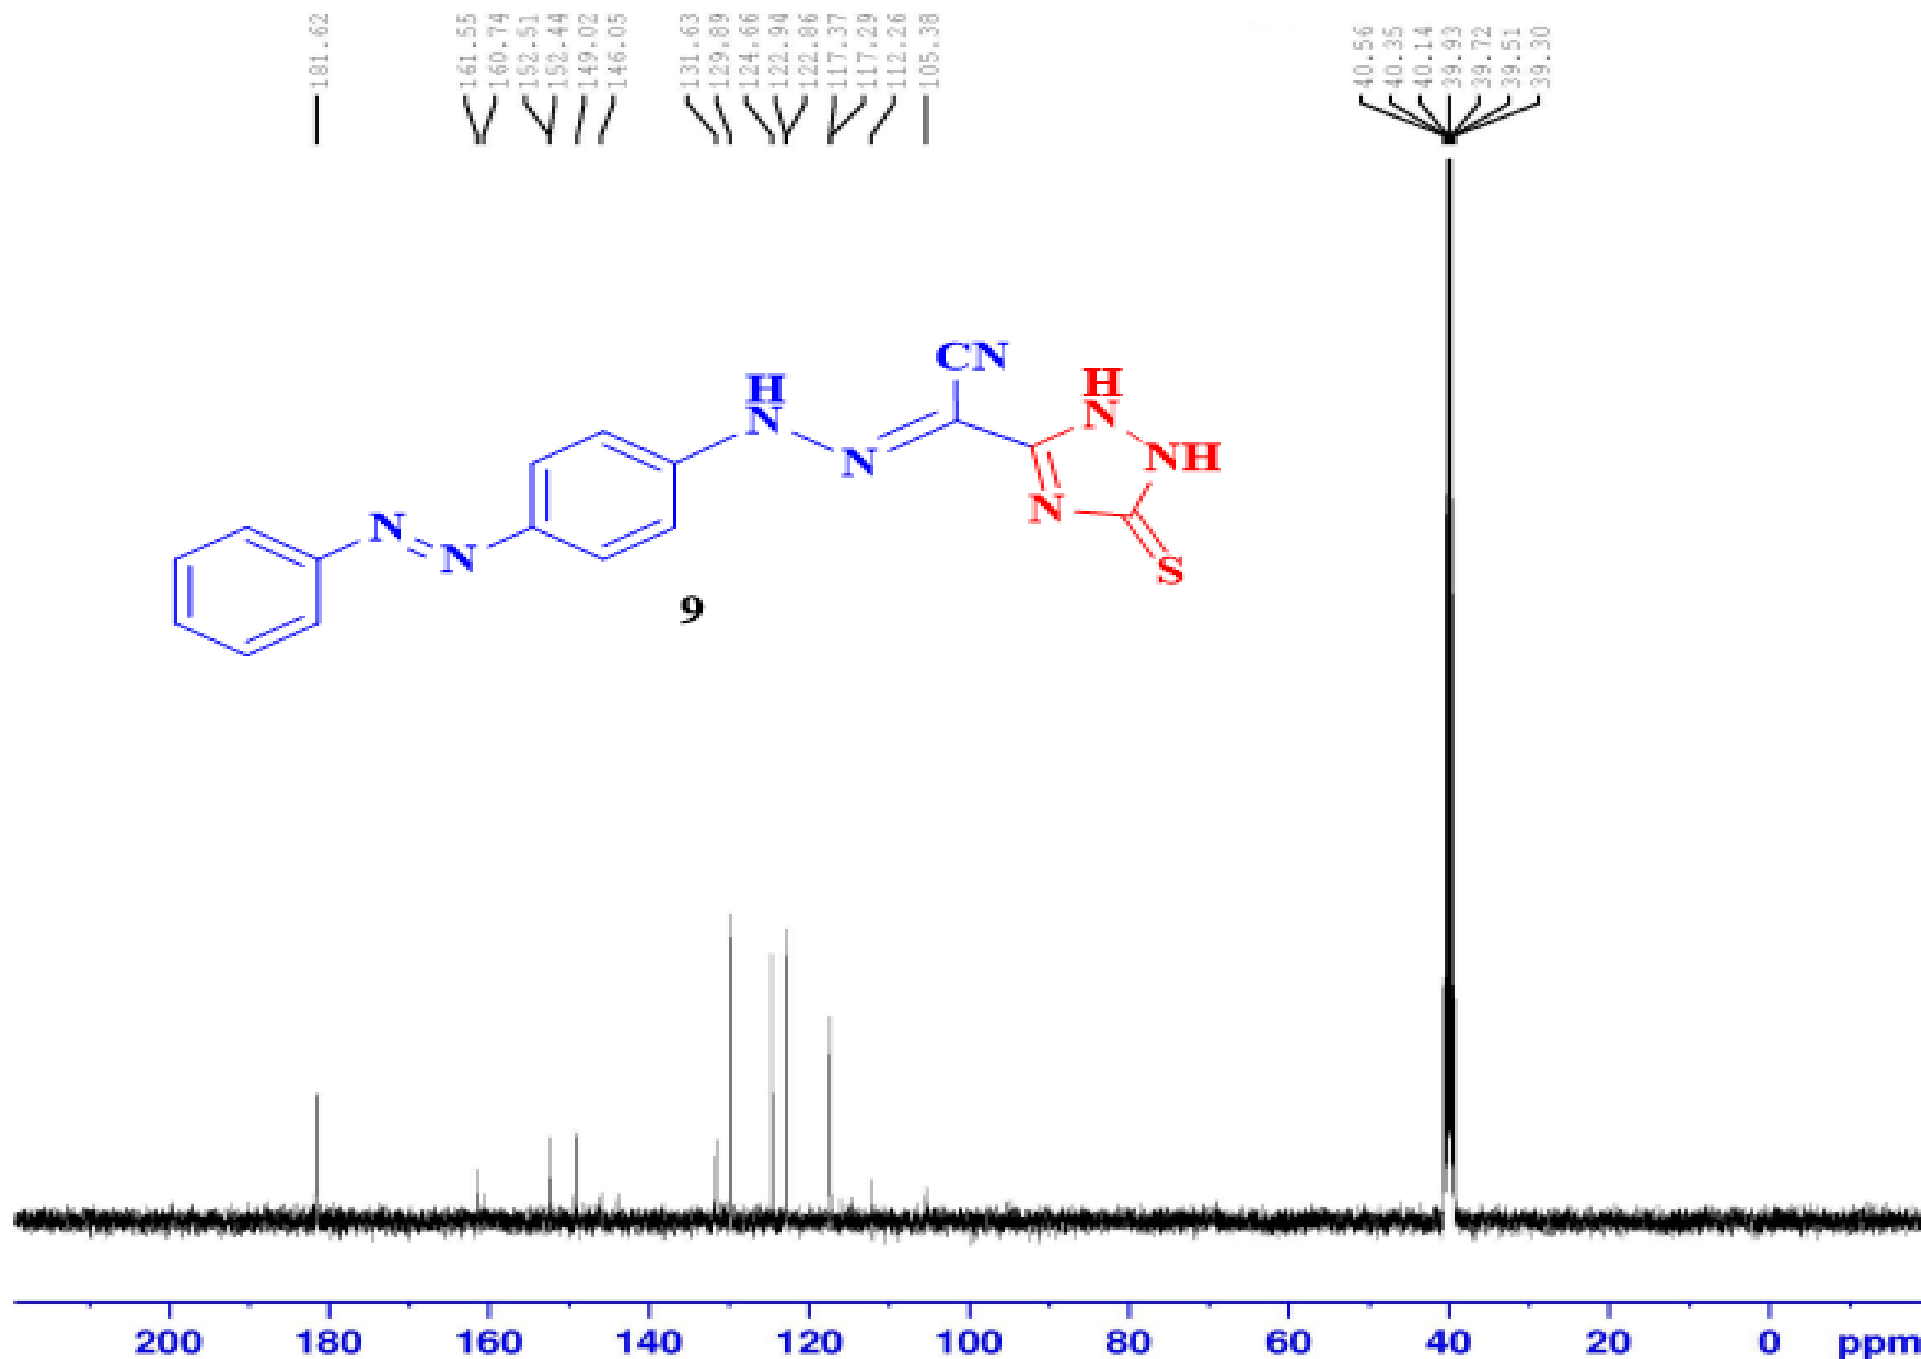

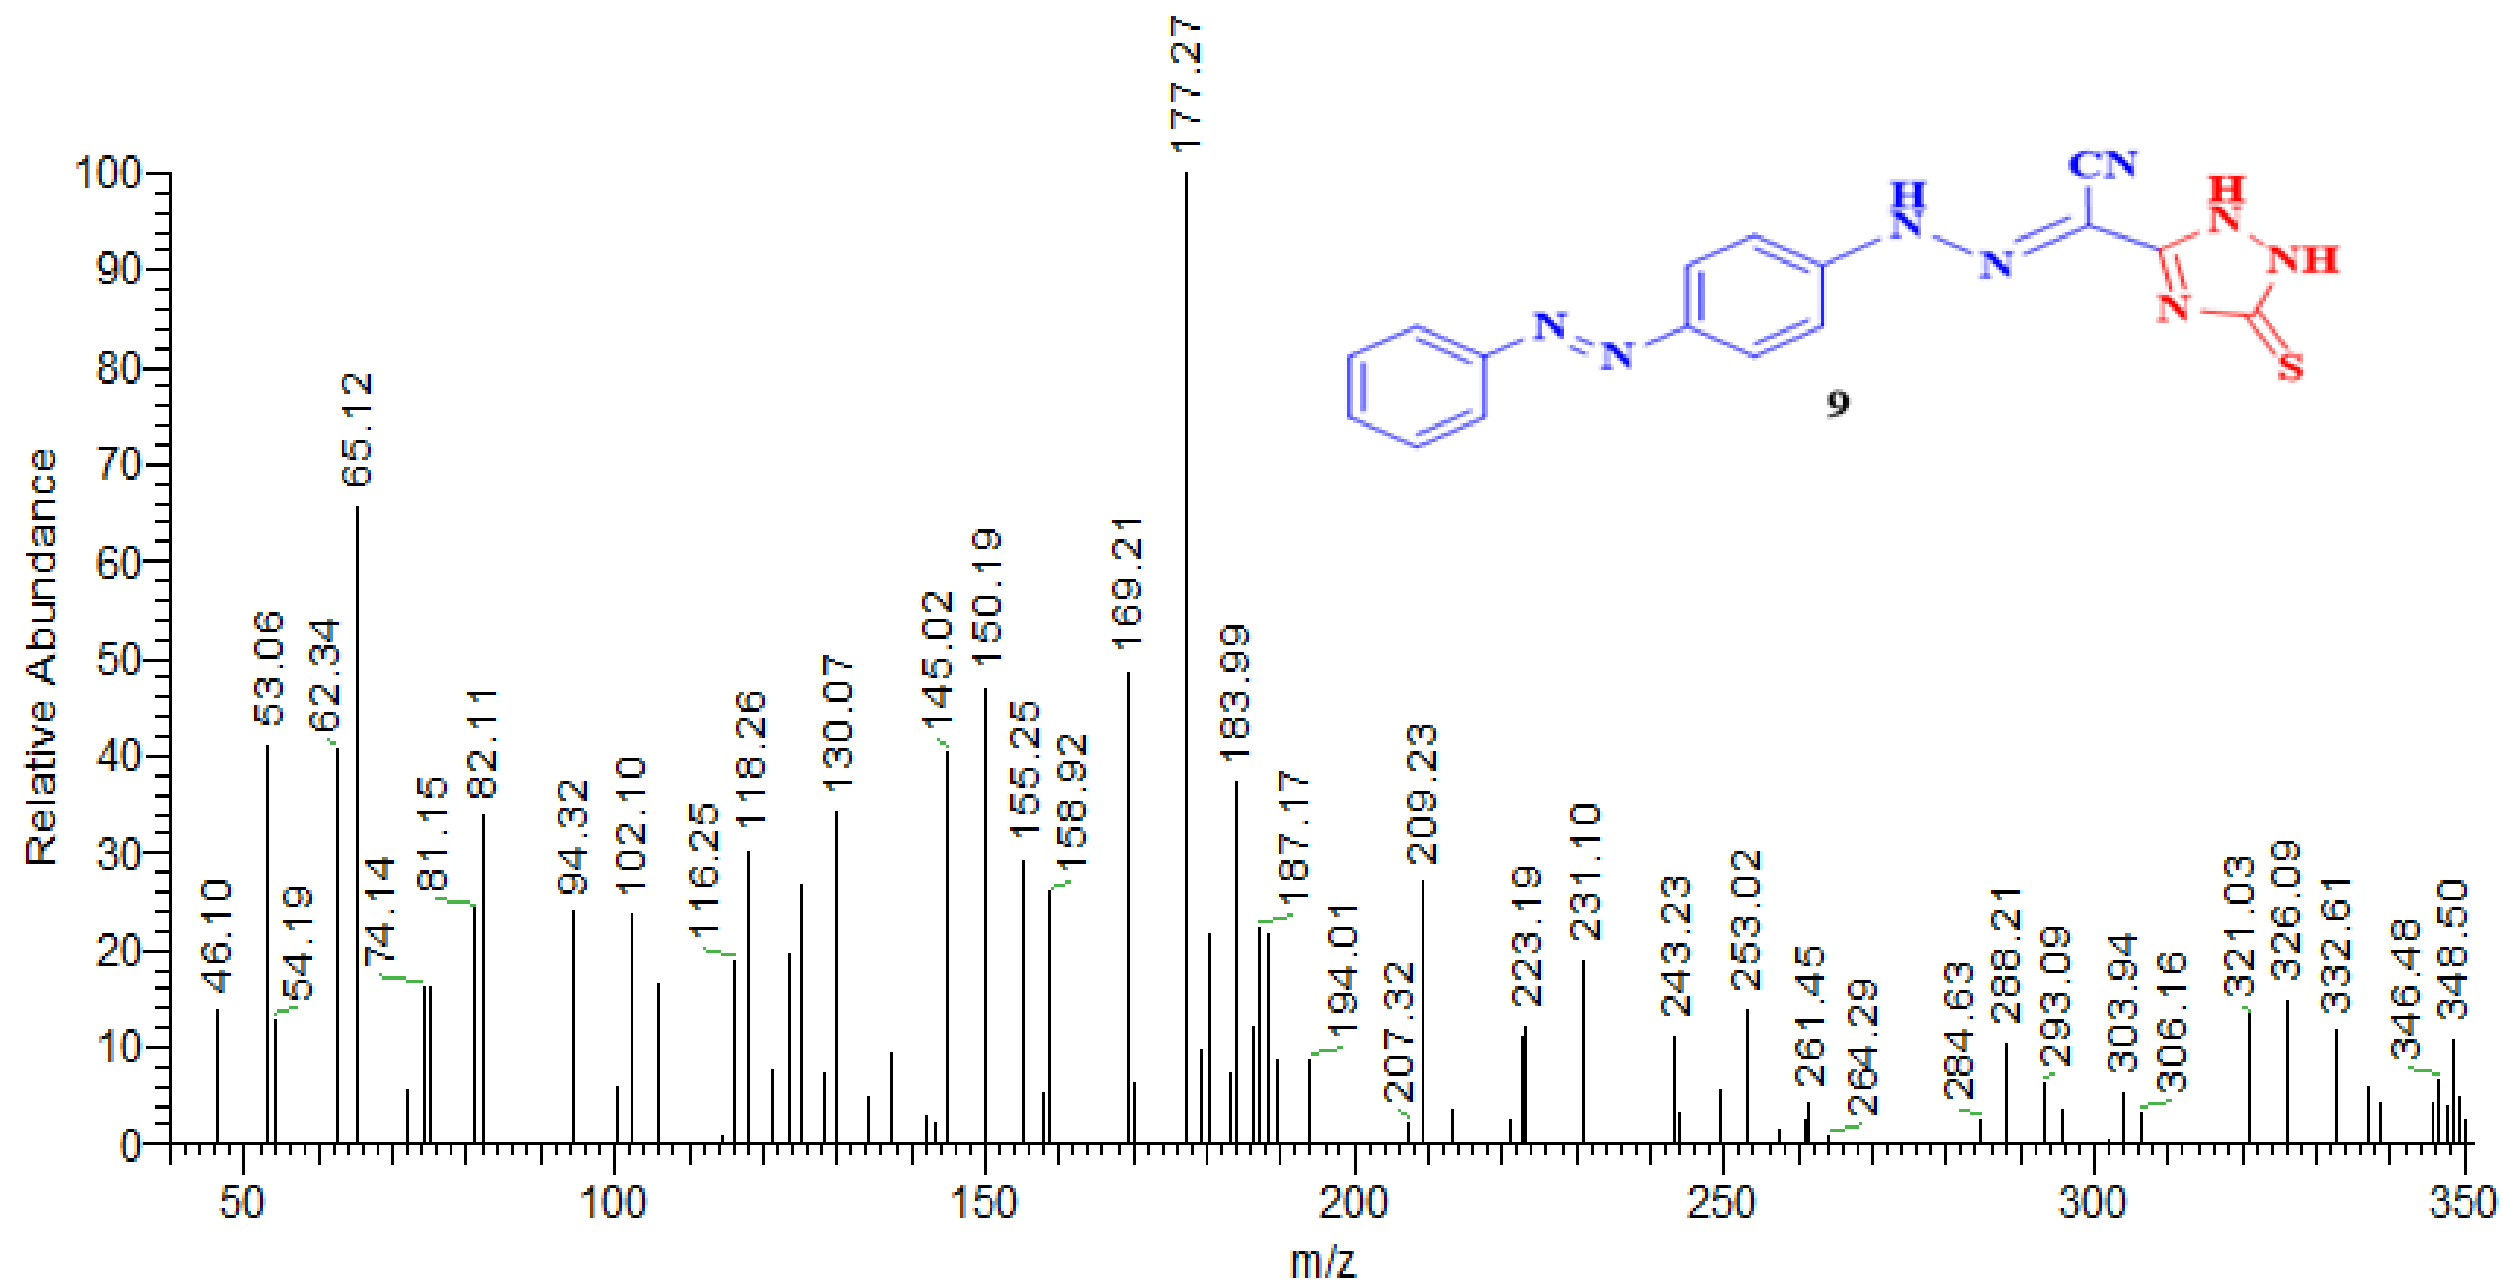

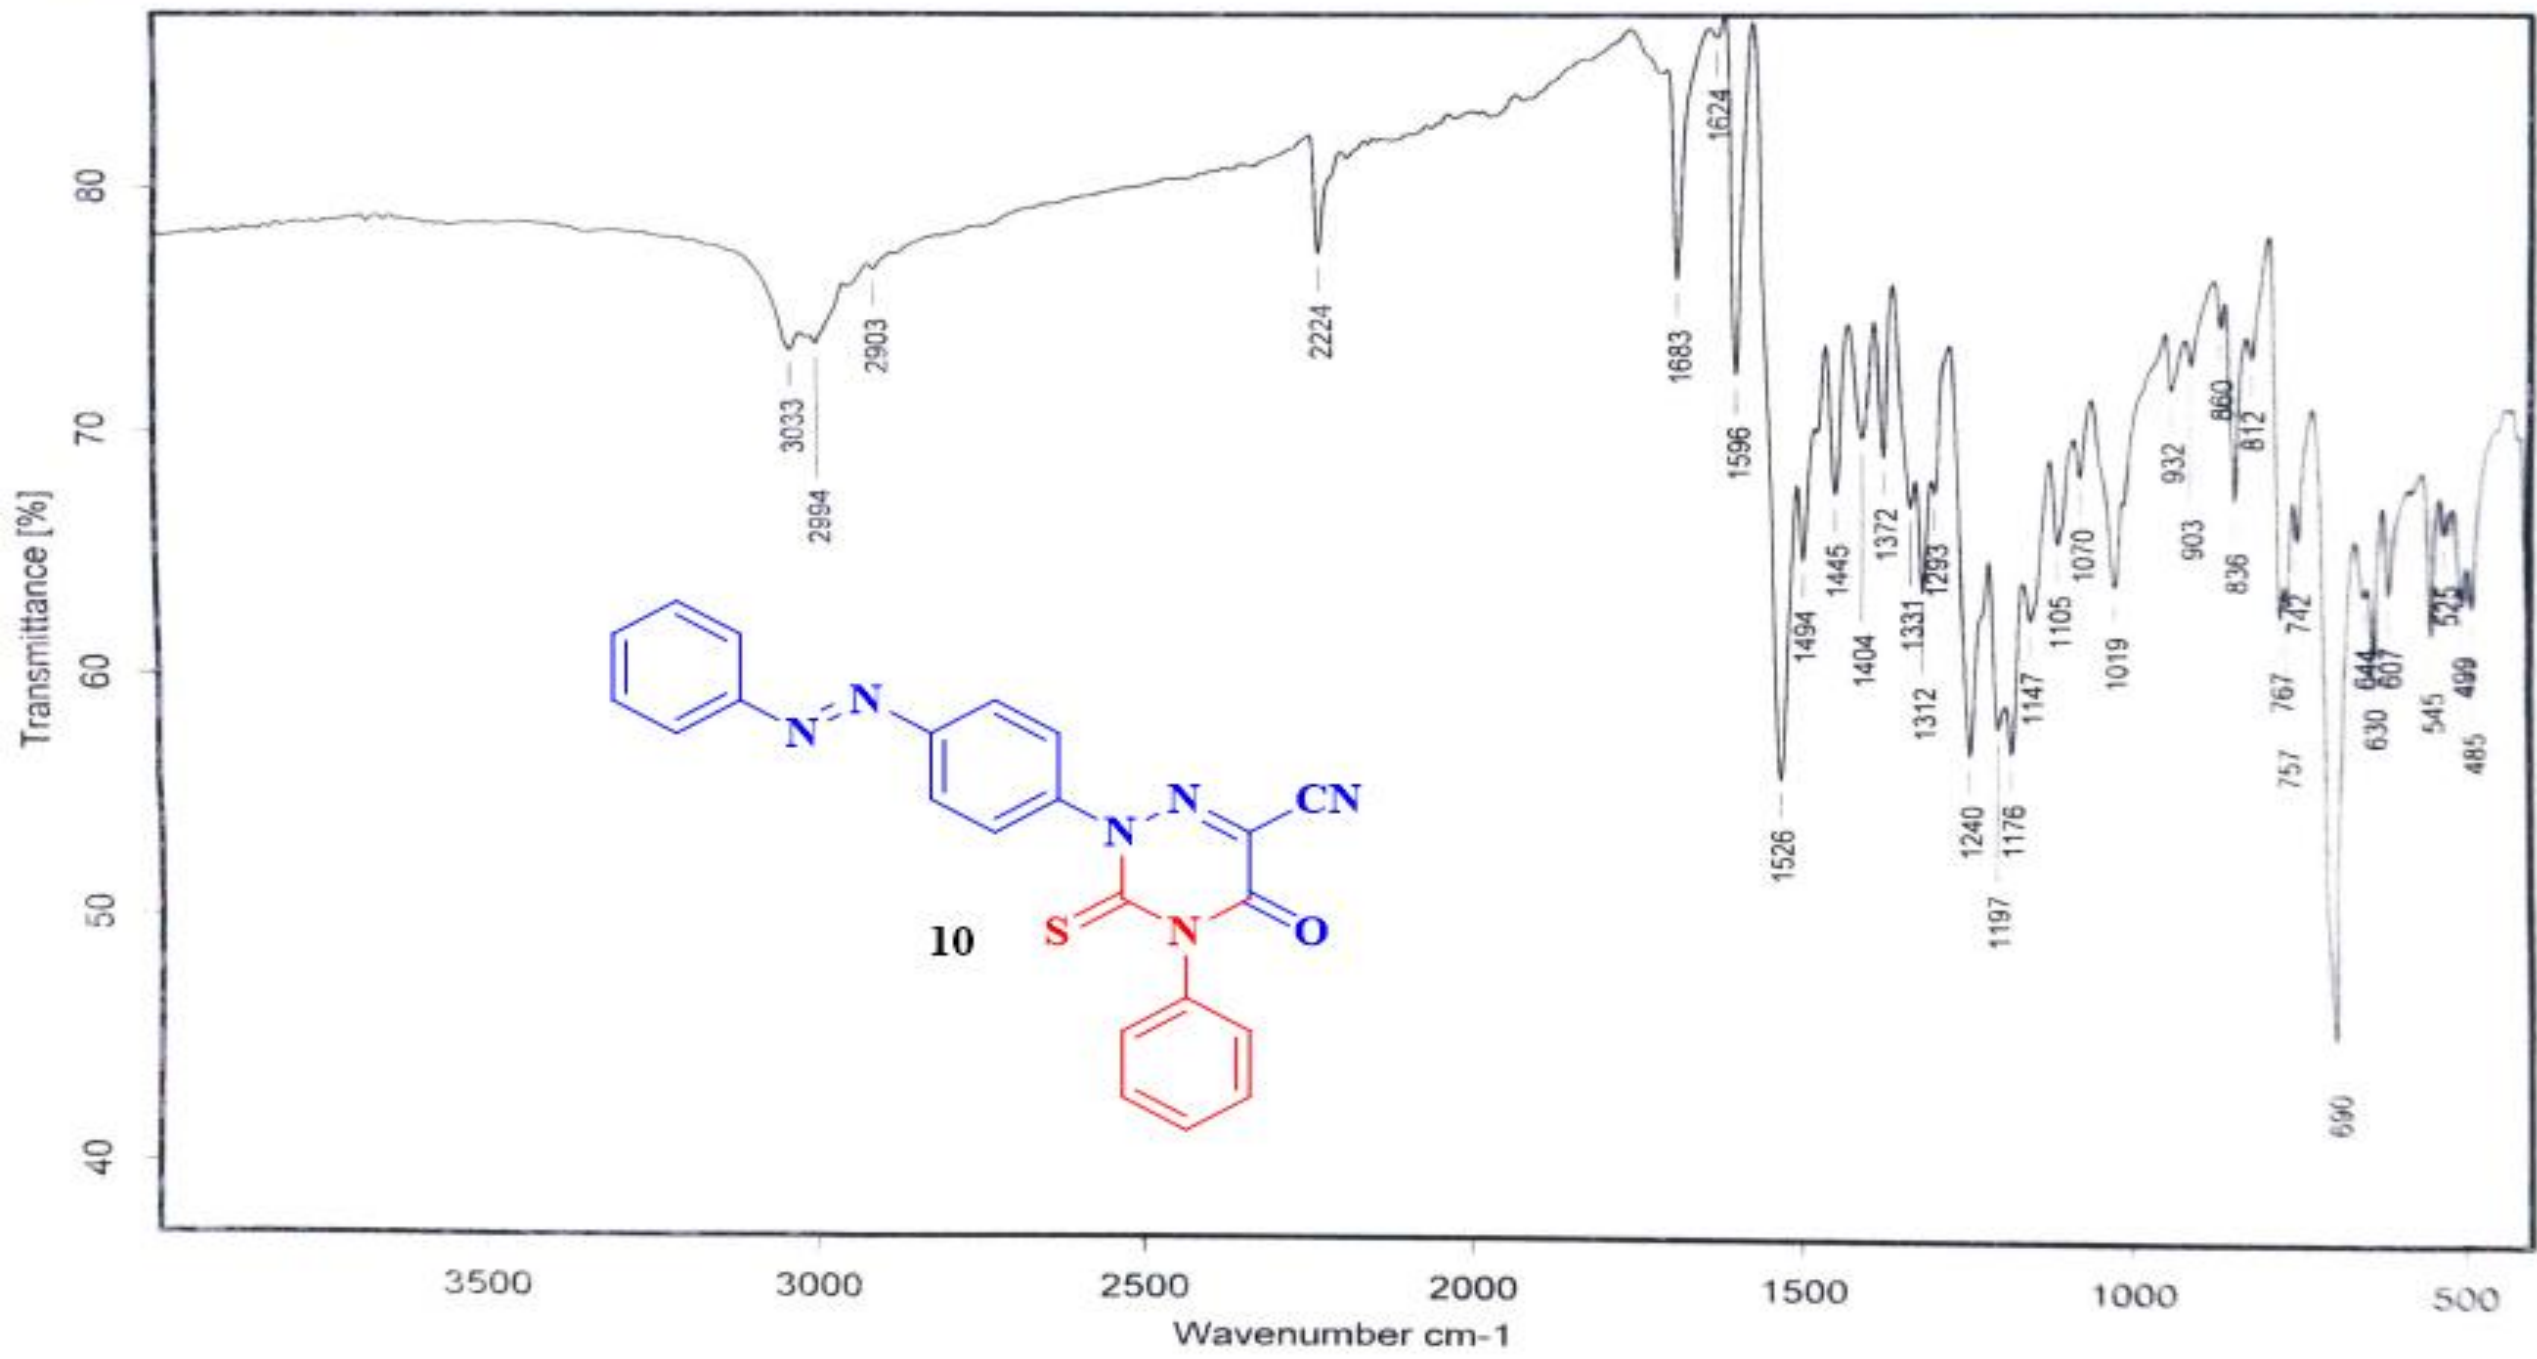

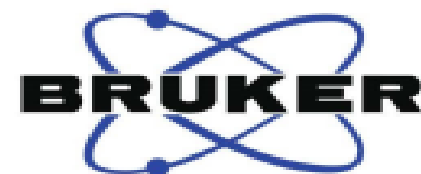

Current Data Parameters  
NAME: nour eldin-PA31  
EXPNO: 1  
PROCNO: 1

F2 - Acquisition Parameters  
Date\_: 20230313  
Time: 16.15  
INSTRUM: spect  
PROBHD: 5 mm PABBO BB/  
PULPROG: zg30  
ID: 65536  
SOLVENT: DMSO  
NS: 128  
DS: 2  
SWH: 8012.820 Hz  
FIDRES: 0.122266 Hz  
AQ: 4.0894465 sec  
RG: 205.37  
DW: 62.400 usec  
DE: 6.50 usec  
TE: 300.0 K  
D1: 1.00000000 sec  
TDO: 1

----- CHANNEL f1 -----  
SFO1: 400.1524711 MHz  
NUC1: 1H  
P1: 12.00 usec  
PLW1: 18.00000000 W

F2 - Processing parameters  
SI: 65536  
SF: 400.1500000 MHz  
WDW: EM  
SSB: 0  
LB: 0.30 Hz  
GB: 0  
PC: 1.00

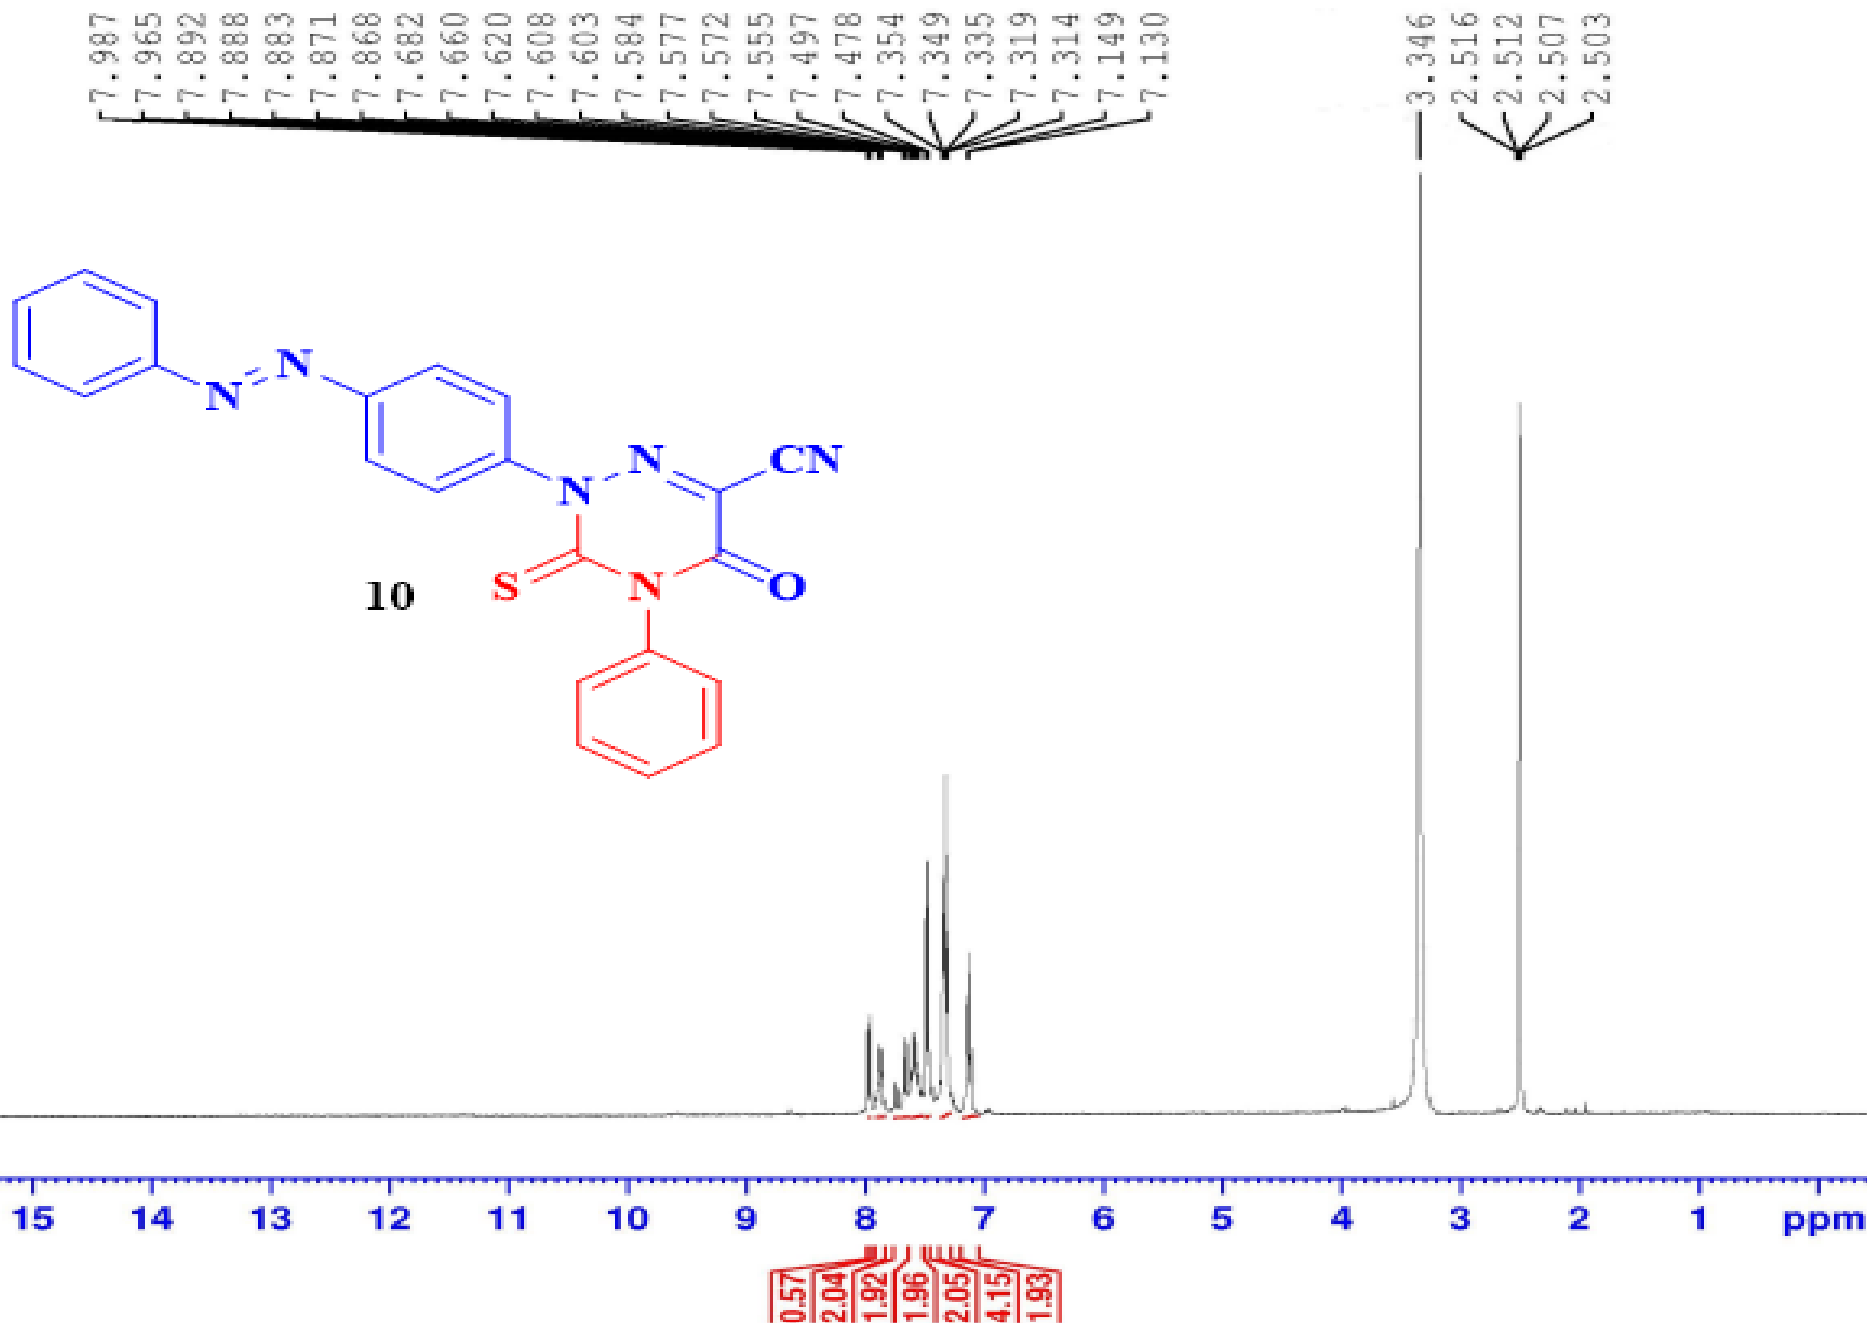

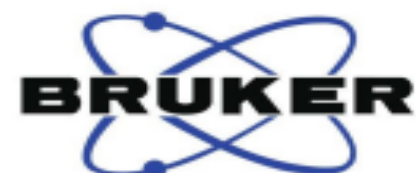

Current Data Parameters  
NAME nour eldin-PA31  
EXPNO 2  
PROCNO 1

F2 - Acquisition Parameters  
Date\_ 20230315  
Time 11.45  
INSTRUM spect  
PROBHD 5 mm PABBO BB/  
PULPROG zgpg30  
ID 65536  
SOLVENT DMSO  
NS 1431  
DS 4  
SWH 24038.461 Hz  
FIDRES 0.366798 Hz  
AQ 1.3631488 sec  
RG 205.37  
DW 20.800 usec  
DE 6.50 usec  
TE 300.0 K  
D1 2.0000000 sec  
D11 0.0300000 sec  
TDO 1

===== CHANNEL f1 =====  
SFO1 100.6278588 MHz  
NUC1 13C  
P1 10.00 usec  
PLW1 47.00000000 W

===== CHANNEL f2 =====  
SFO2 400.1516006 MHz  
NUC2 1H  
CPDPRG(2) waltz16  
PCPD2 90.00 usec  
PLW2 18.00000000 W  
PLW12 0.34722000 W  
PLW13 0.28125000 W

F2 - Processing parameters  
SI 32768  
SF 100.6177975 MHz  
WDW EM  
SSB 0  
LB 1.00 Hz  
GB 0  
PC 1.40

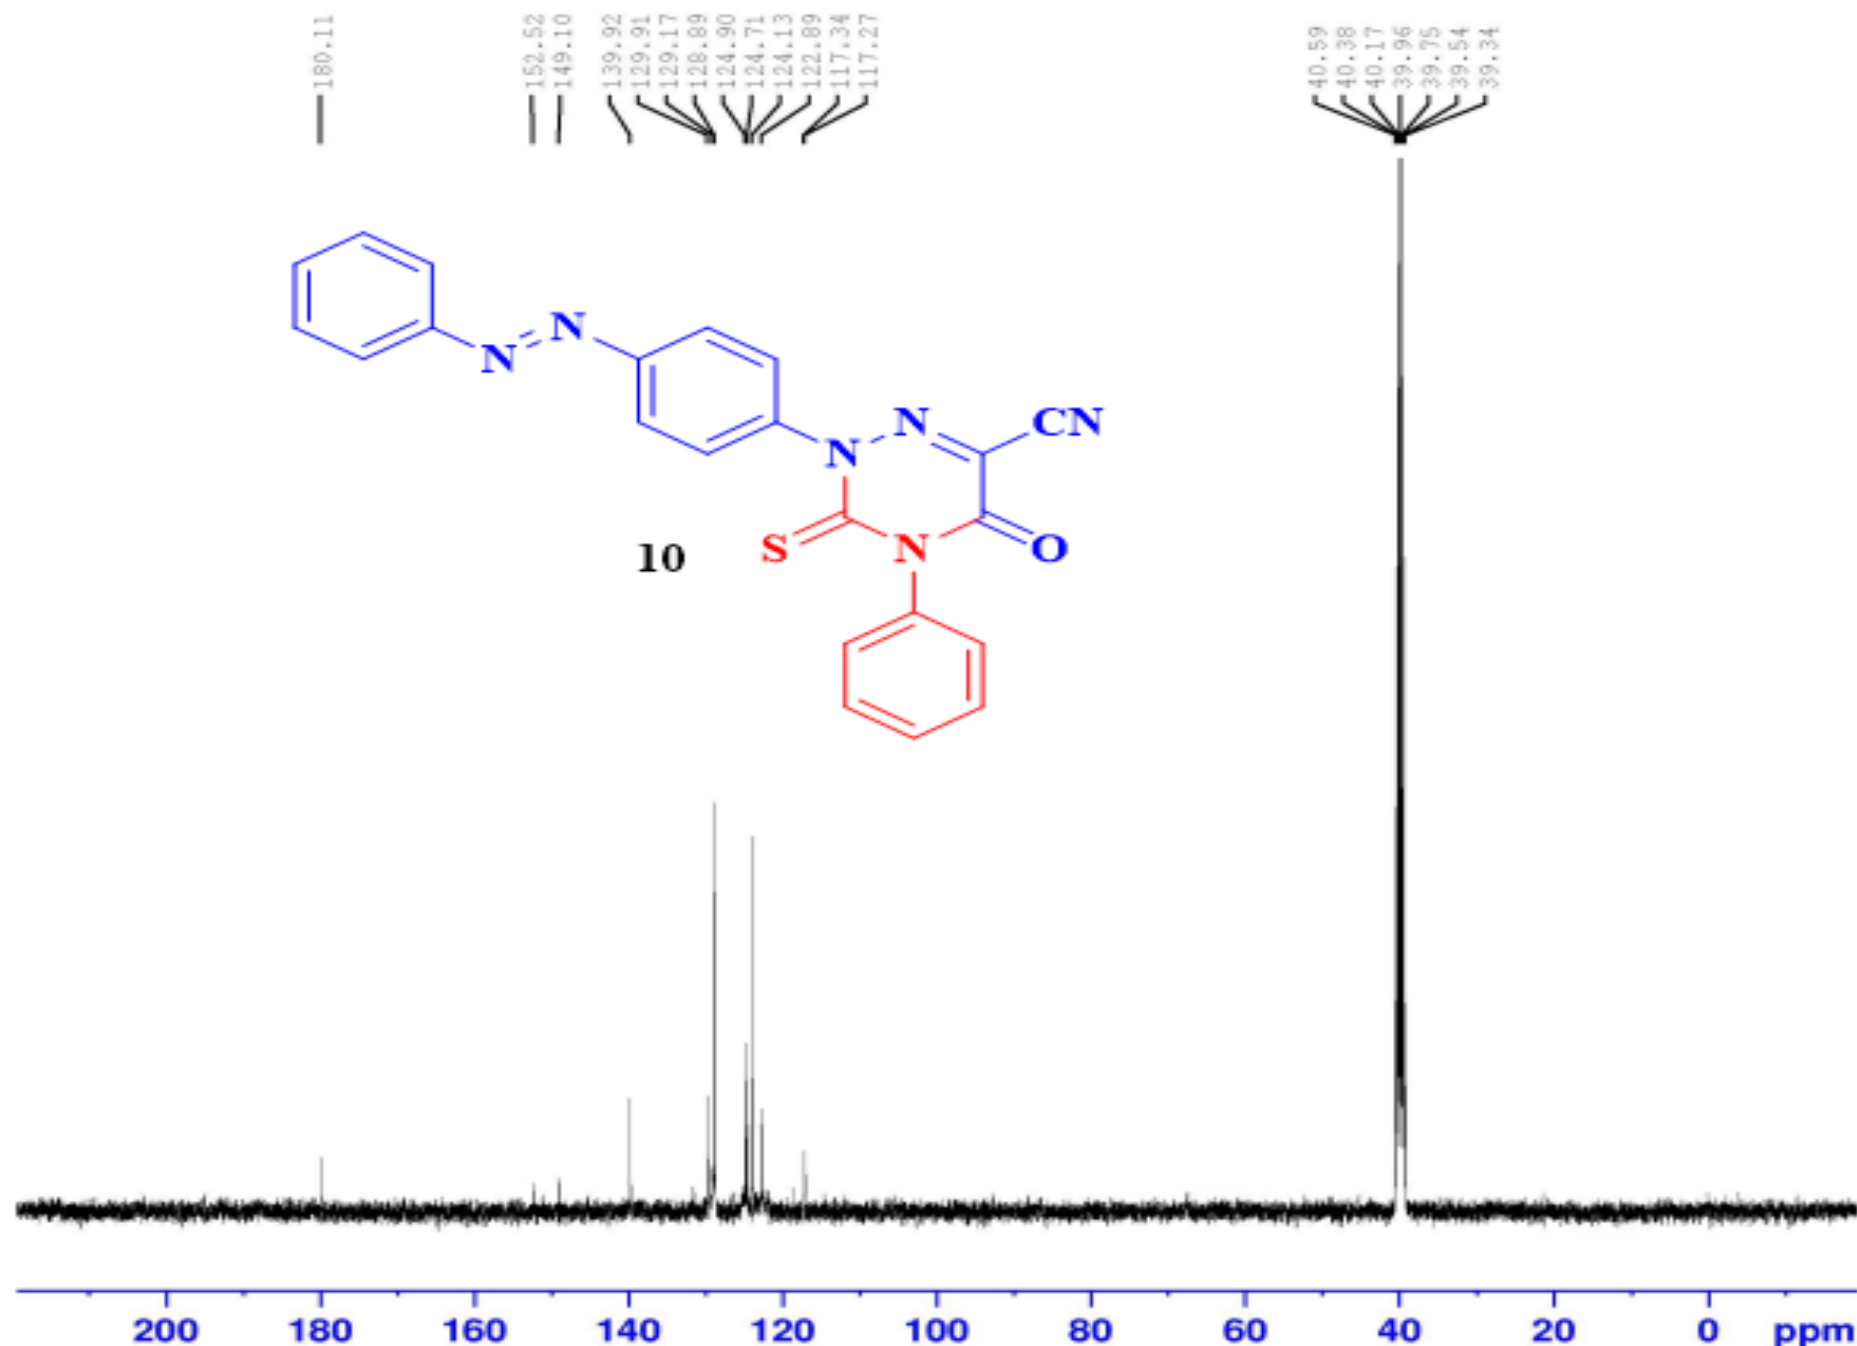

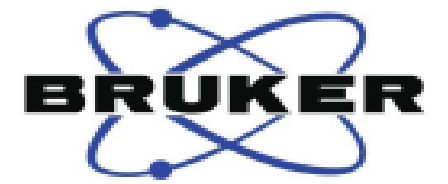

Current Data Parameters  
NAME nour eldin-PA28  
EXPNO 1  
PROCNO 1

F2 - Acquisition Parameters  
Date\_ 20230313  
Time 17.42  
INSTRUM spect  
PROBHD 5 mm PABBO BB/  
PULPROG zg30  
ID 65536  
SOLVENT DMSO  
NS 128  
DS 2  
SWH 8012.820 Hz  
FIDRES 0.122266 Hz  
AQ 4.0894465 sec  
RG 205.37  
DW 62.400 usec  
DE 6.50 usec  
IE 300.0 K  
D1 1.00000000 sec  
TD0 1

===== CHANNEL f1 =====  
SFO1 400.1524711 MHz  
NUC1 1H  
P1 12.00 usec  
PLW1 18.00000000 W

F2 - Processing parameters  
SI 65536  
SF 400.1500000 MHz  
WDW EM  
SSB 0  
LB 0.30 Hz  
GB 0  
PC 1.00

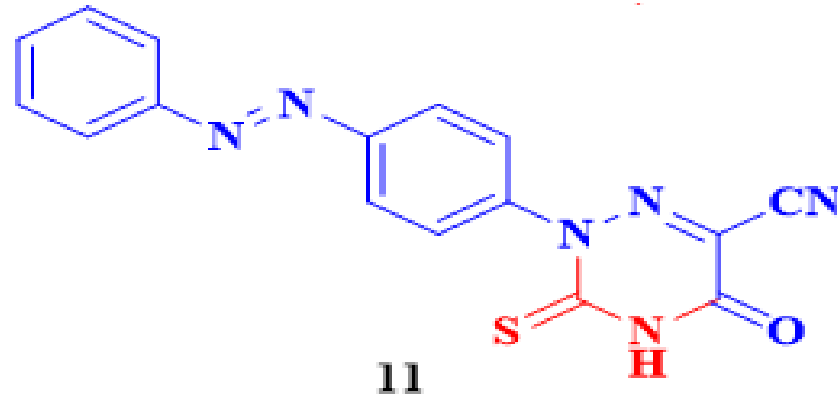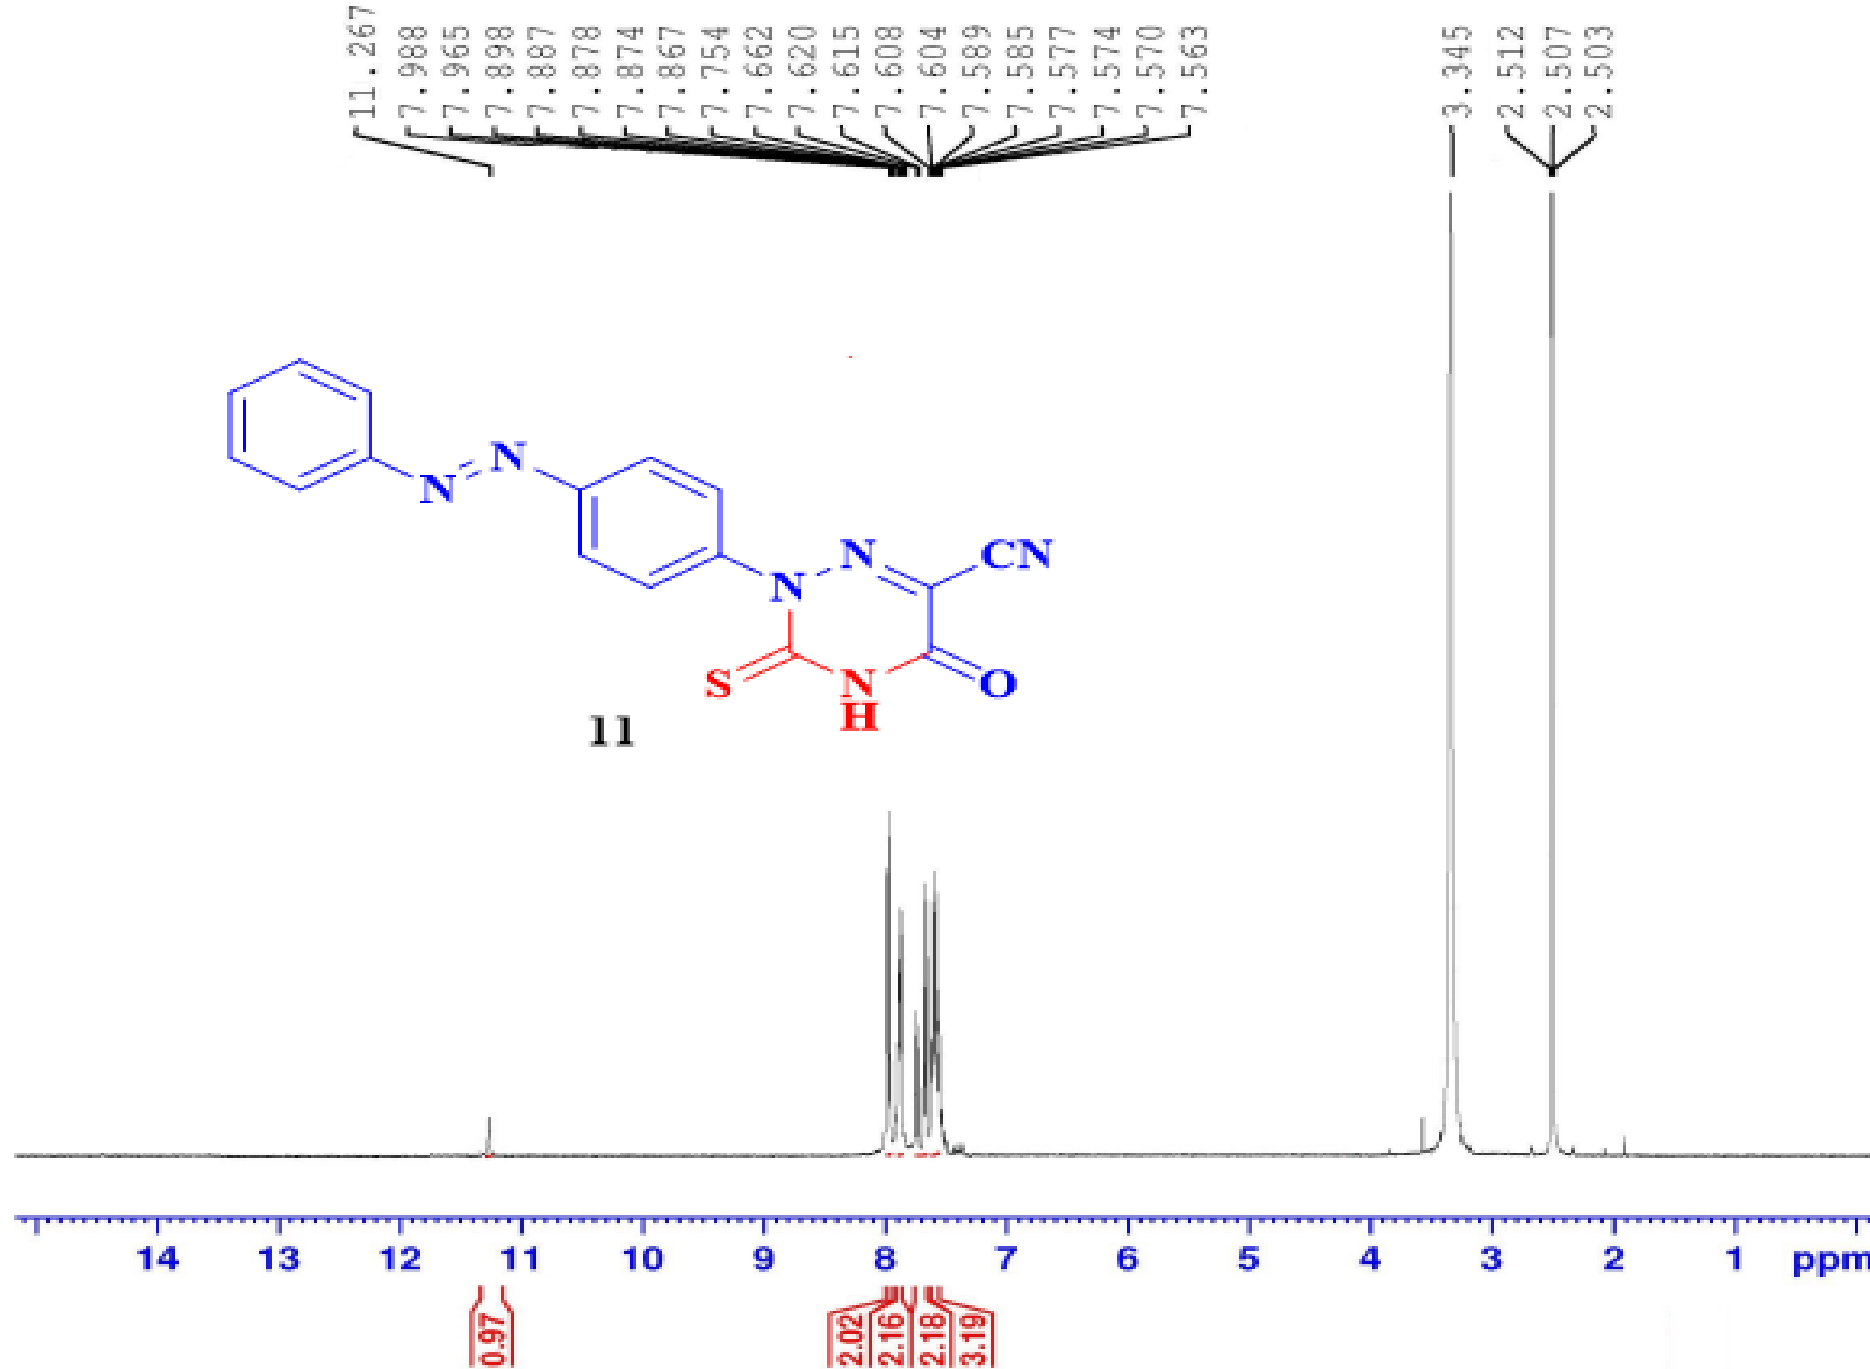

11.267  
7.988  
7.965  
7.898  
7.887  
7.878  
7.874  
7.867  
7.754  
7.662  
7.620  
7.615  
7.608  
7.604  
7.589  
7.585  
7.577  
7.574  
7.570  
7.563

3.345  
2.512  
2.507  
2.503

0.97

2.02  
2.16  
2.18  
3.19

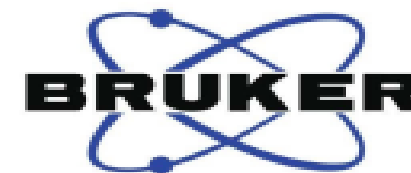

Current Data Parameters  
NAME neur eldin-PA28  
EXPNO 2  
PROCNO 1

F2 - Acquisition Parameters  
Date\_ 20230315  
Time 13.49  
INSTRUM spect  
PROBHD 5 mm PABBO BB/  
PULPROG zgpg30  
ID 65536  
SOLVENT DMSO  
NS 1000  
DS 4  
SWH 24038.461 Hz  
FIDRES 0.366798 Hz  
AQ 1.3631488 sec  
RG 205.37  
DW 20.800 usec  
DE 6.50 usec  
TE 300.0 K  
D1 2.00000000 sec  
D11 0.03000000 sec  
ID0 1

----- CHANNEL f1 -----  
SFO1 100.6278588 MHz  
NUC1 13C  
P1 10.00 usec  
PLW1 47.00000000 W

----- CHANNEL f2 -----  
SFO2 400.1516006 MHz  
NUC2 1H  
CPDPRG(2) waltz16  
PCPD2 90.00 usec  
PLW2 18.00000000 W  
PLW12 0.34722000 W  
PLW13 0.28125000 W

F2 - Processing parameters  
SI 32768  
SF 100.6177975 MHz  
WDW EM  
SSB 0  
LB 1.00 Hz  
GB 0  
PC 1.40

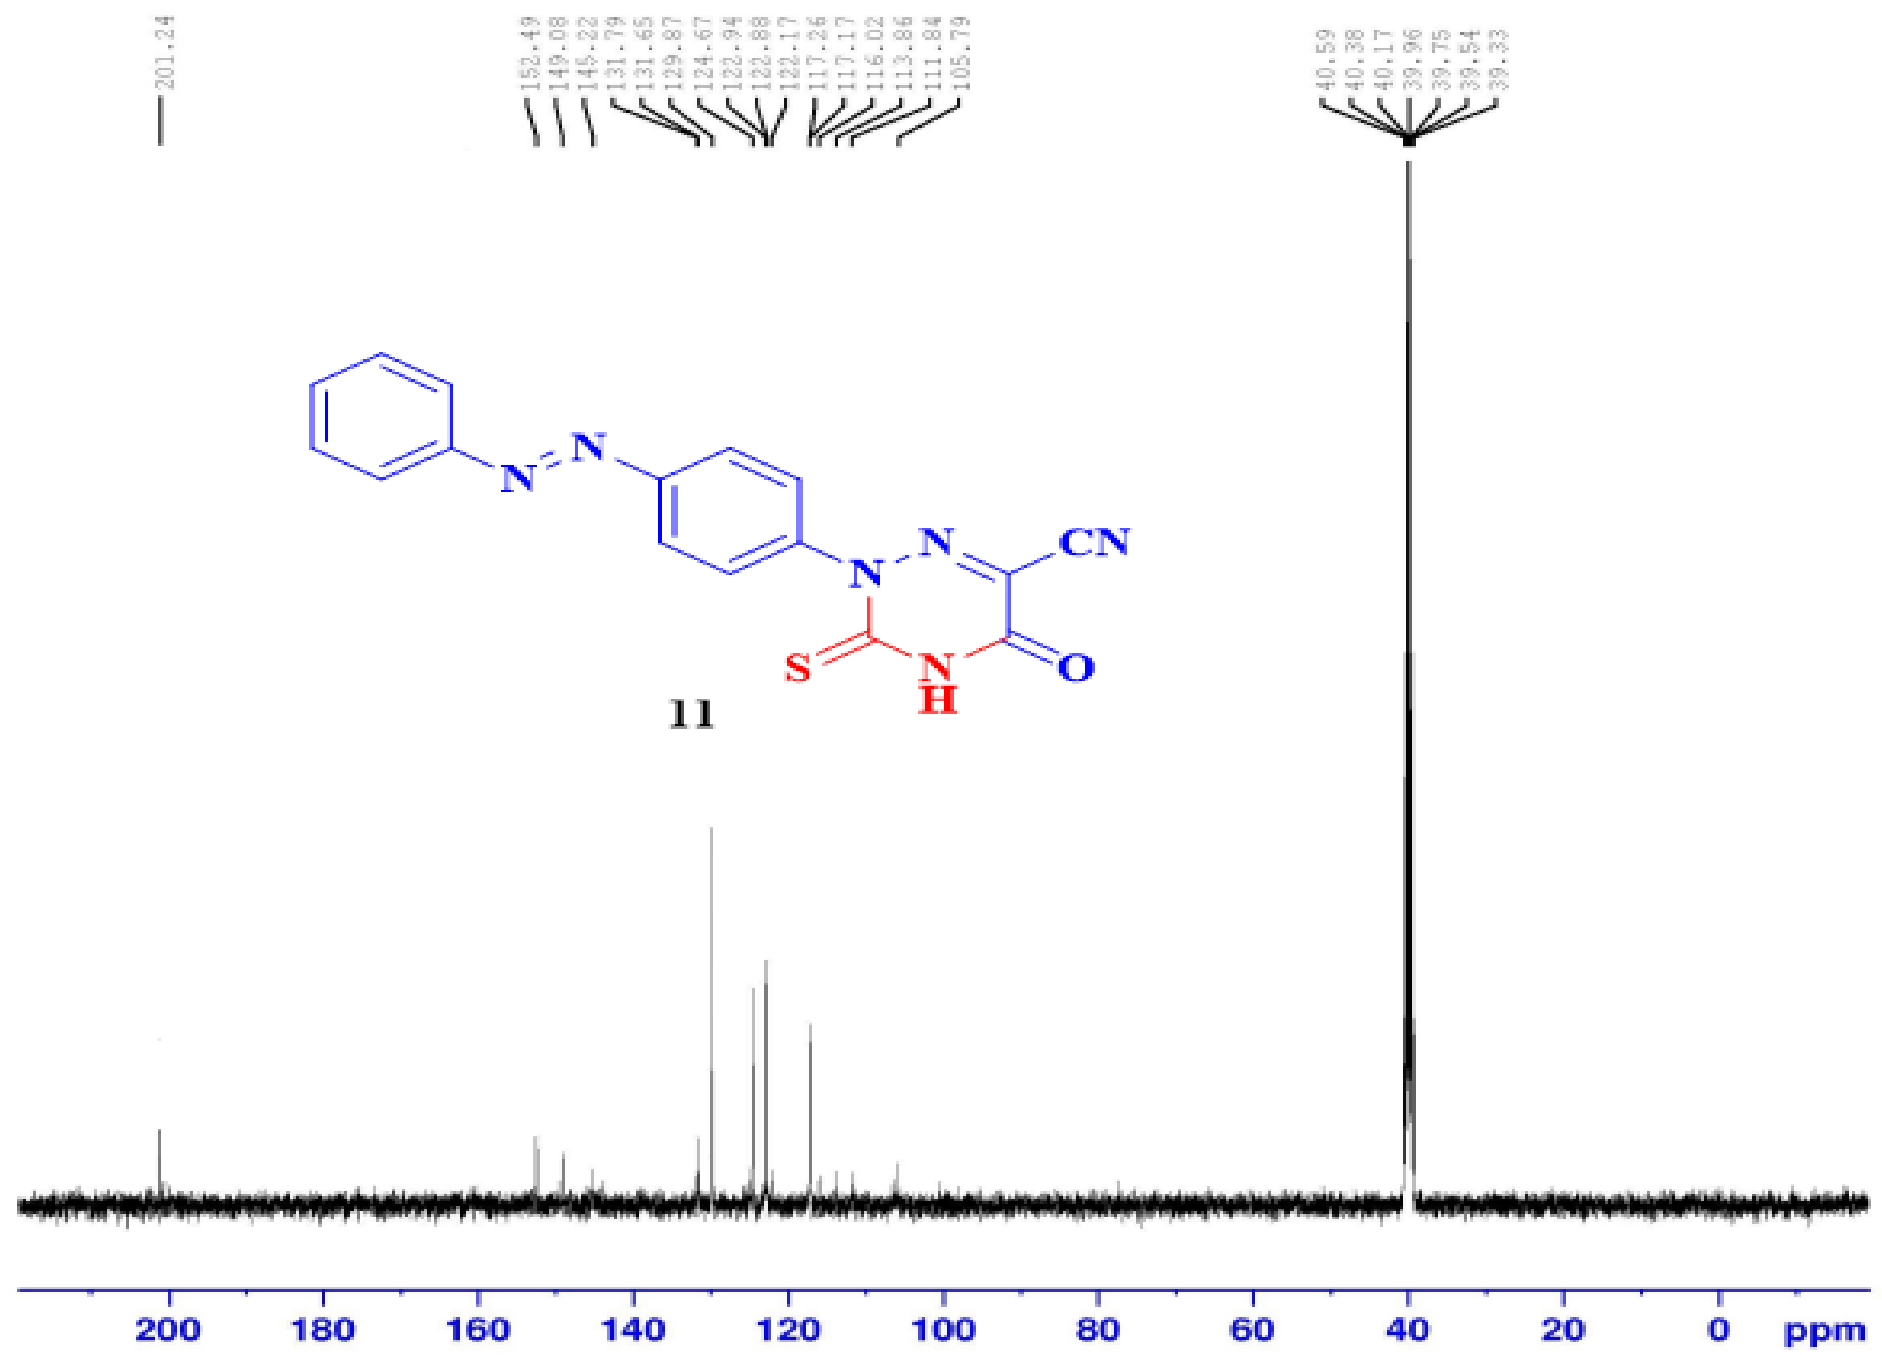

152.49  
149.08  
145.22  
131.79  
131.65  
129.87  
124.67  
122.94  
122.88  
122.17  
117.26  
117.17  
116.02  
113.86  
111.84  
105.79

40.59  
40.38  
40.17  
39.96  
39.75  
39.54  
39.33

200 180 160 140 120 100 80 60 40 20 0 ppm

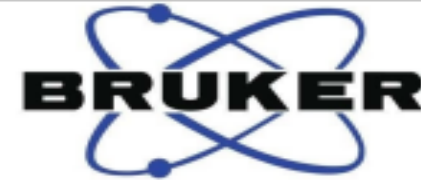

Current Data Parameters  
NAME nour eldin-PA27  
EXPNO 1  
PROCNO 1

F2 - Acquisition Parameters  
Date\_ 20230313  
Time 16.37  
INSTRUM spect  
PROBHD 5 mm PABBO BB/  
PULPROG zg30  
TD 65536  
SOLVENT DMSO  
NS 94  
DS 2  
SWH 8012.820 Hz  
FIDRES 0.122266 Hz  
AQ 4.0894465 sec  
RG 205.37  
DW 62.400 usec  
DE 6.50 usec  
TE 300.0 K  
D1 1.00000000 sec  
TD0 1

----- CHANNEL f1 -----  
SF01 400.1524711 MHz  
NUC1 1H  
P1 12.00 usec  
PLW1 18.00000000 W

F2 - Processing parameters  
SI 65536  
SF 400.150000 MHz  
WDW EM  
SSB 0  
LB 0.30 Hz  
GB 0  
PC 1.00

12.439  
8.004  
7.980  
7.976  
7.958  
7.910  
7.887  
7.883  
7.877  
7.873  
7.866  
7.741  
7.719  
7.678  
7.656  
7.615  
7.599  
7.580  
7.569  
7.559  
7.552  
7.537  
7.534  
7.513  
7.493

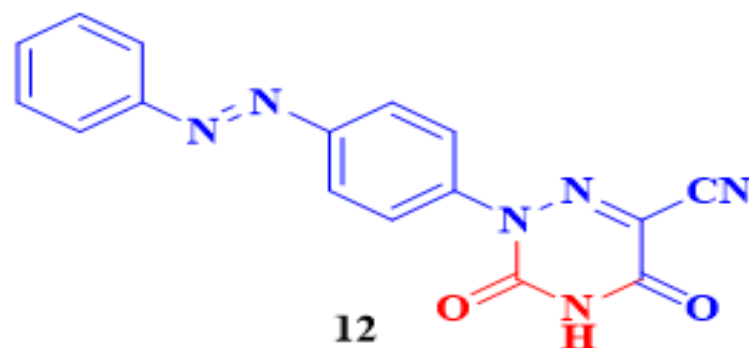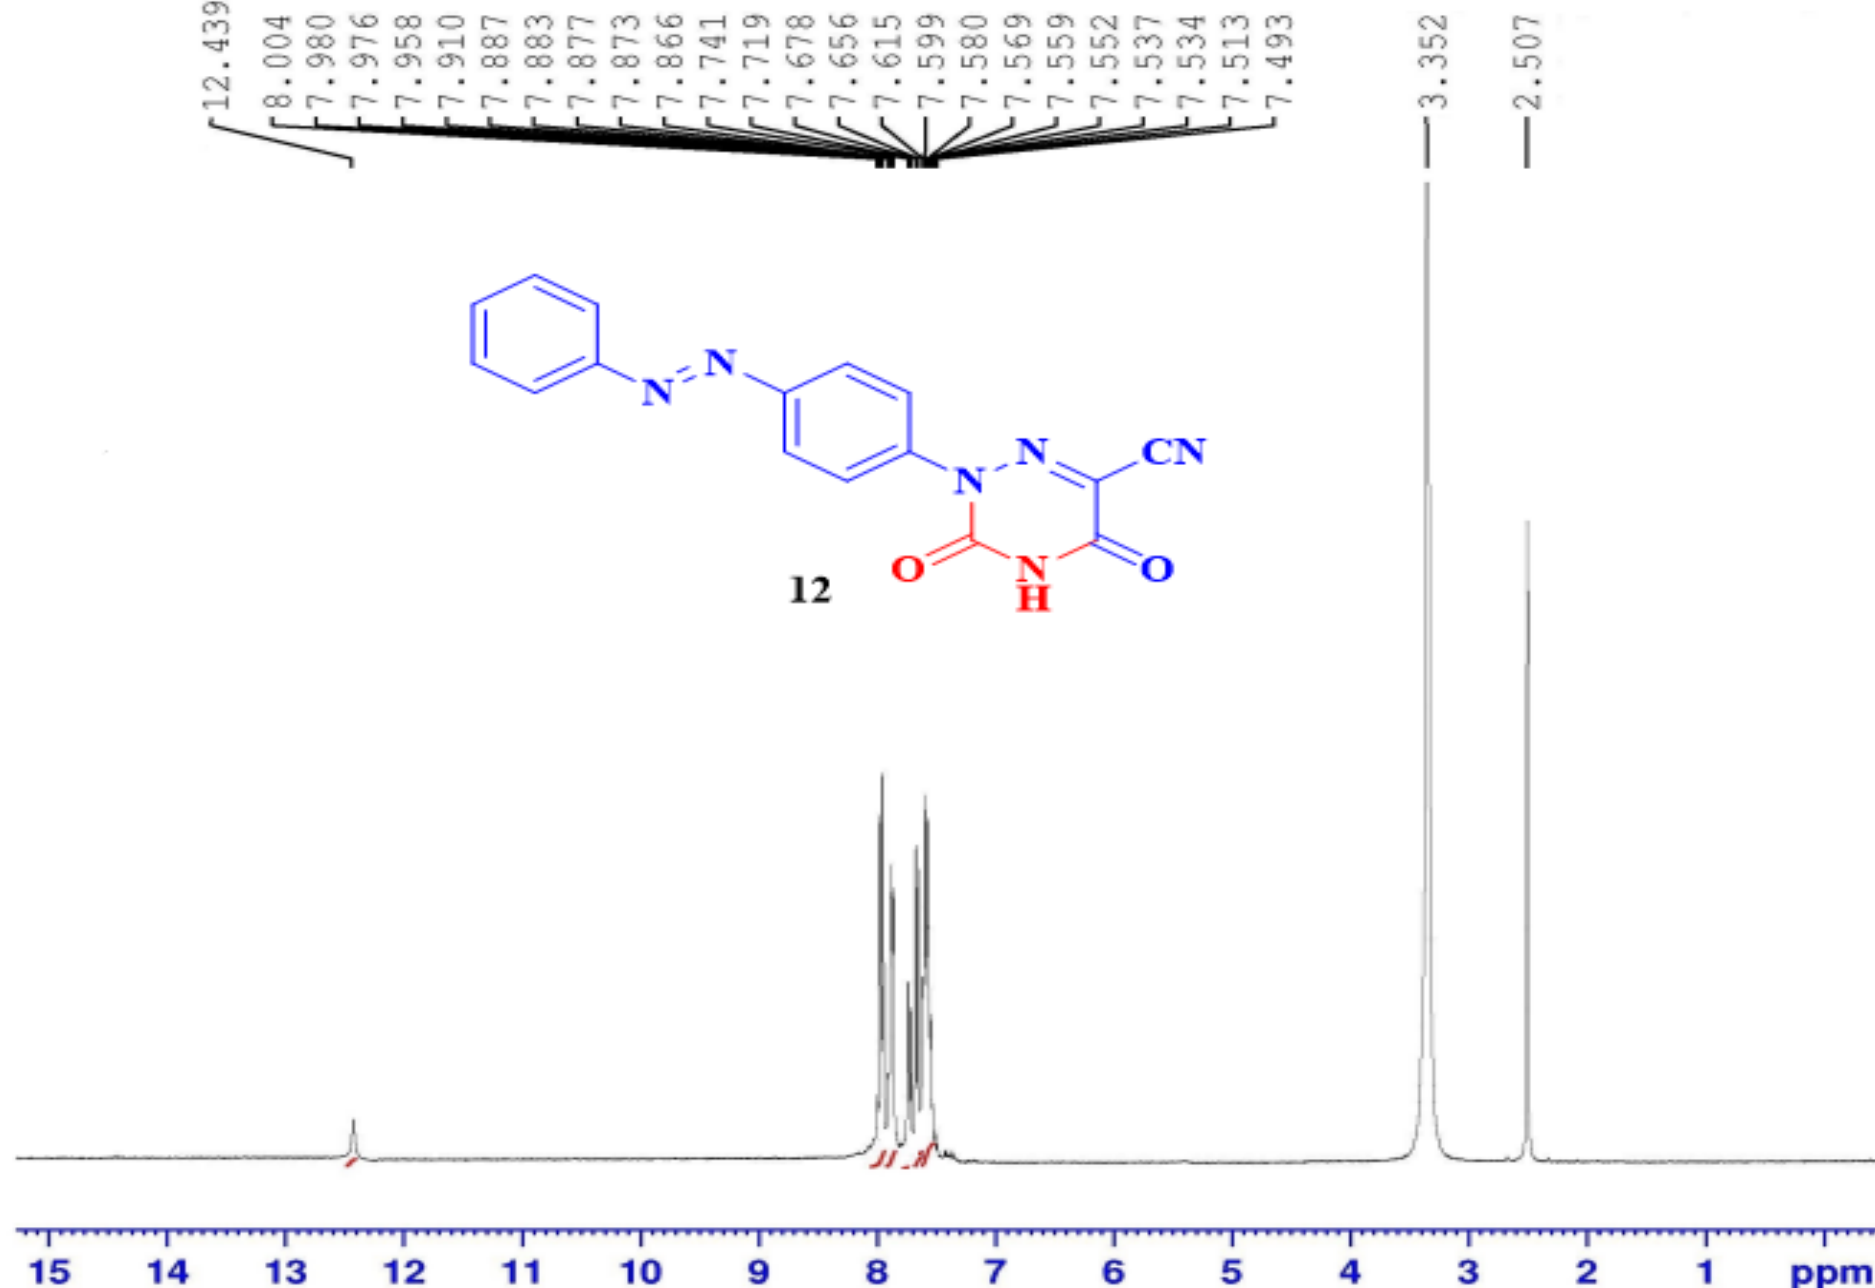

1.03

2.04  
2.03  
0.42  
2.00  
3.01



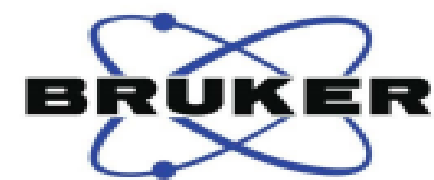

Current Data Parameters  
NAME neur eldin-PA27  
EXPNO 2  
PROCNO 1

F2 - Acquisition Parameters  
Date\_ 20230314  
Time 12.30  
INSTRUM spect  
PROBHD 5 mm PABBO BB/  
PULPROG zgpg30  
ID 65536  
SOLVENT DMSO  
NS 1376  
DS 4  
SWH 24038.461 Hz  
FIDRES 0.366798 Hz  
AQ 1.3631468 sec  
RG 205.37  
DW 20.800 usec  
DE 6.50 usec  
TE 300.0 K  
D1 2.00000000 sec  
D11 0.03000000 sec  
TD0 1

----- CHANNEL f1 -----  
SFO1 100.6278588 MHz  
NUC1 13C  
P1 10.00 usec  
PLW1 47.00000000 W

----- CHANNEL f2 -----  
SFO2 400.1516006 MHz  
NUC2 1H  
CPDPRG[2] waltz16  
PCPD2 90.00 usec  
PLW2 18.00000000 W  
PLW12 0.34722000 W  
PLW13 0.28125000 W

F2 - Processing parameters  
SI 32768  
SF 100.6177975 MHz  
WDW EM  
SSB 0  
LB 1.00 Hz  
GB 0  
PC 1.40

161.21  
160.74  
152.49  
149.08  
145.19  
143.91  
131.77  
131.64  
129.86  
124.66  
122.94  
122.88  
117.26  
117.16  
116.01  
113.87

40.60  
40.39  
40.18  
39.97  
39.76  
39.56  
39.35

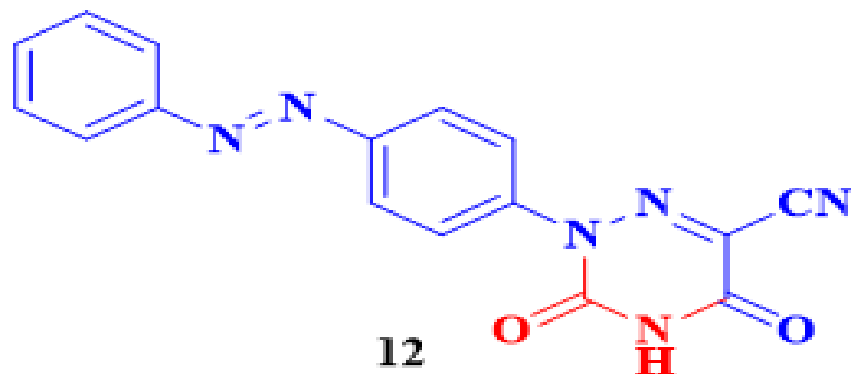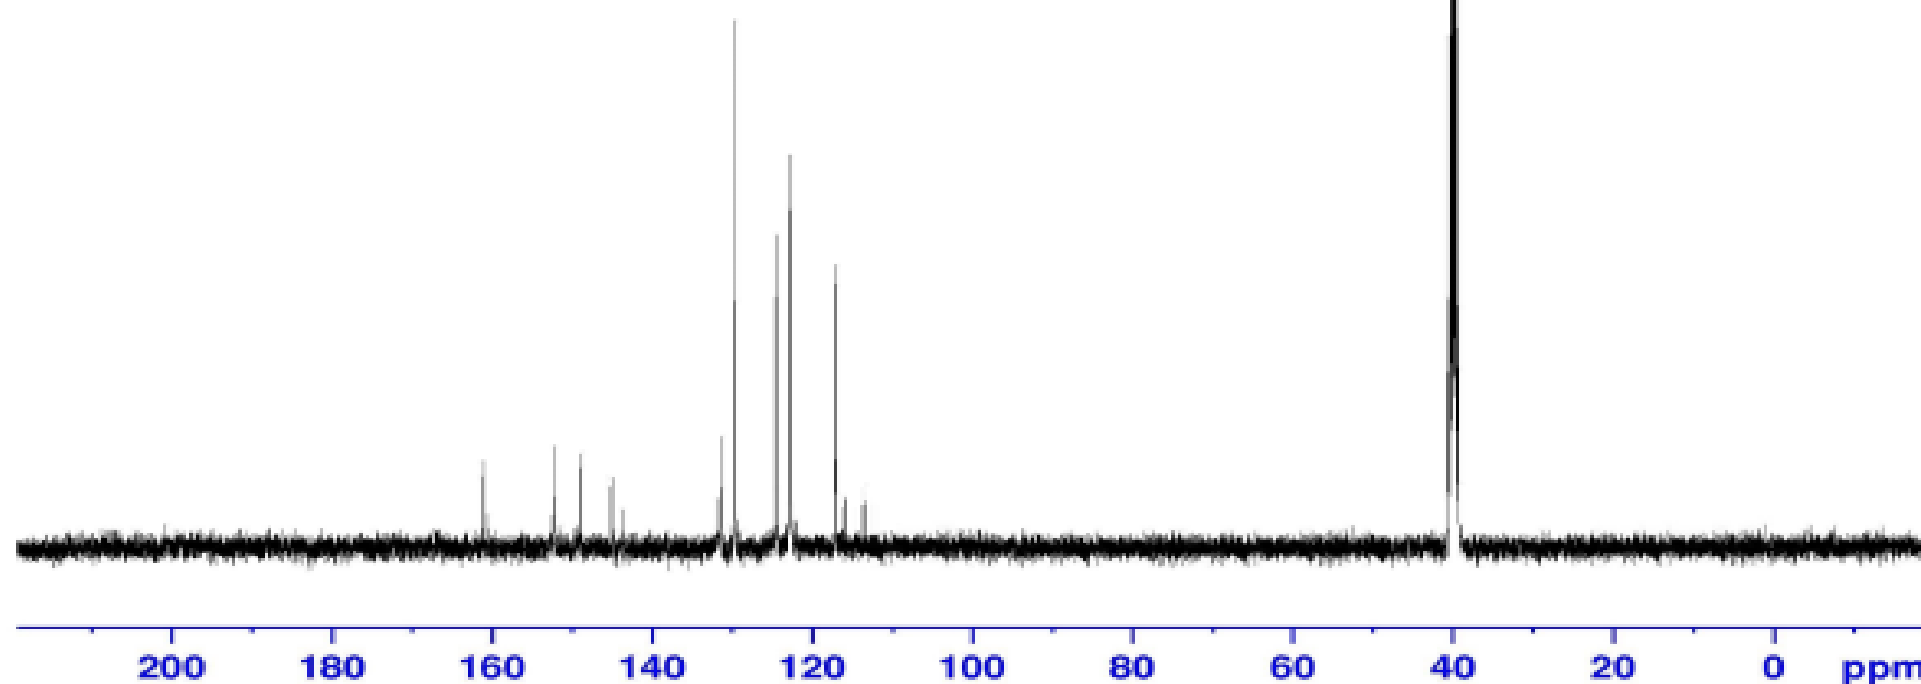

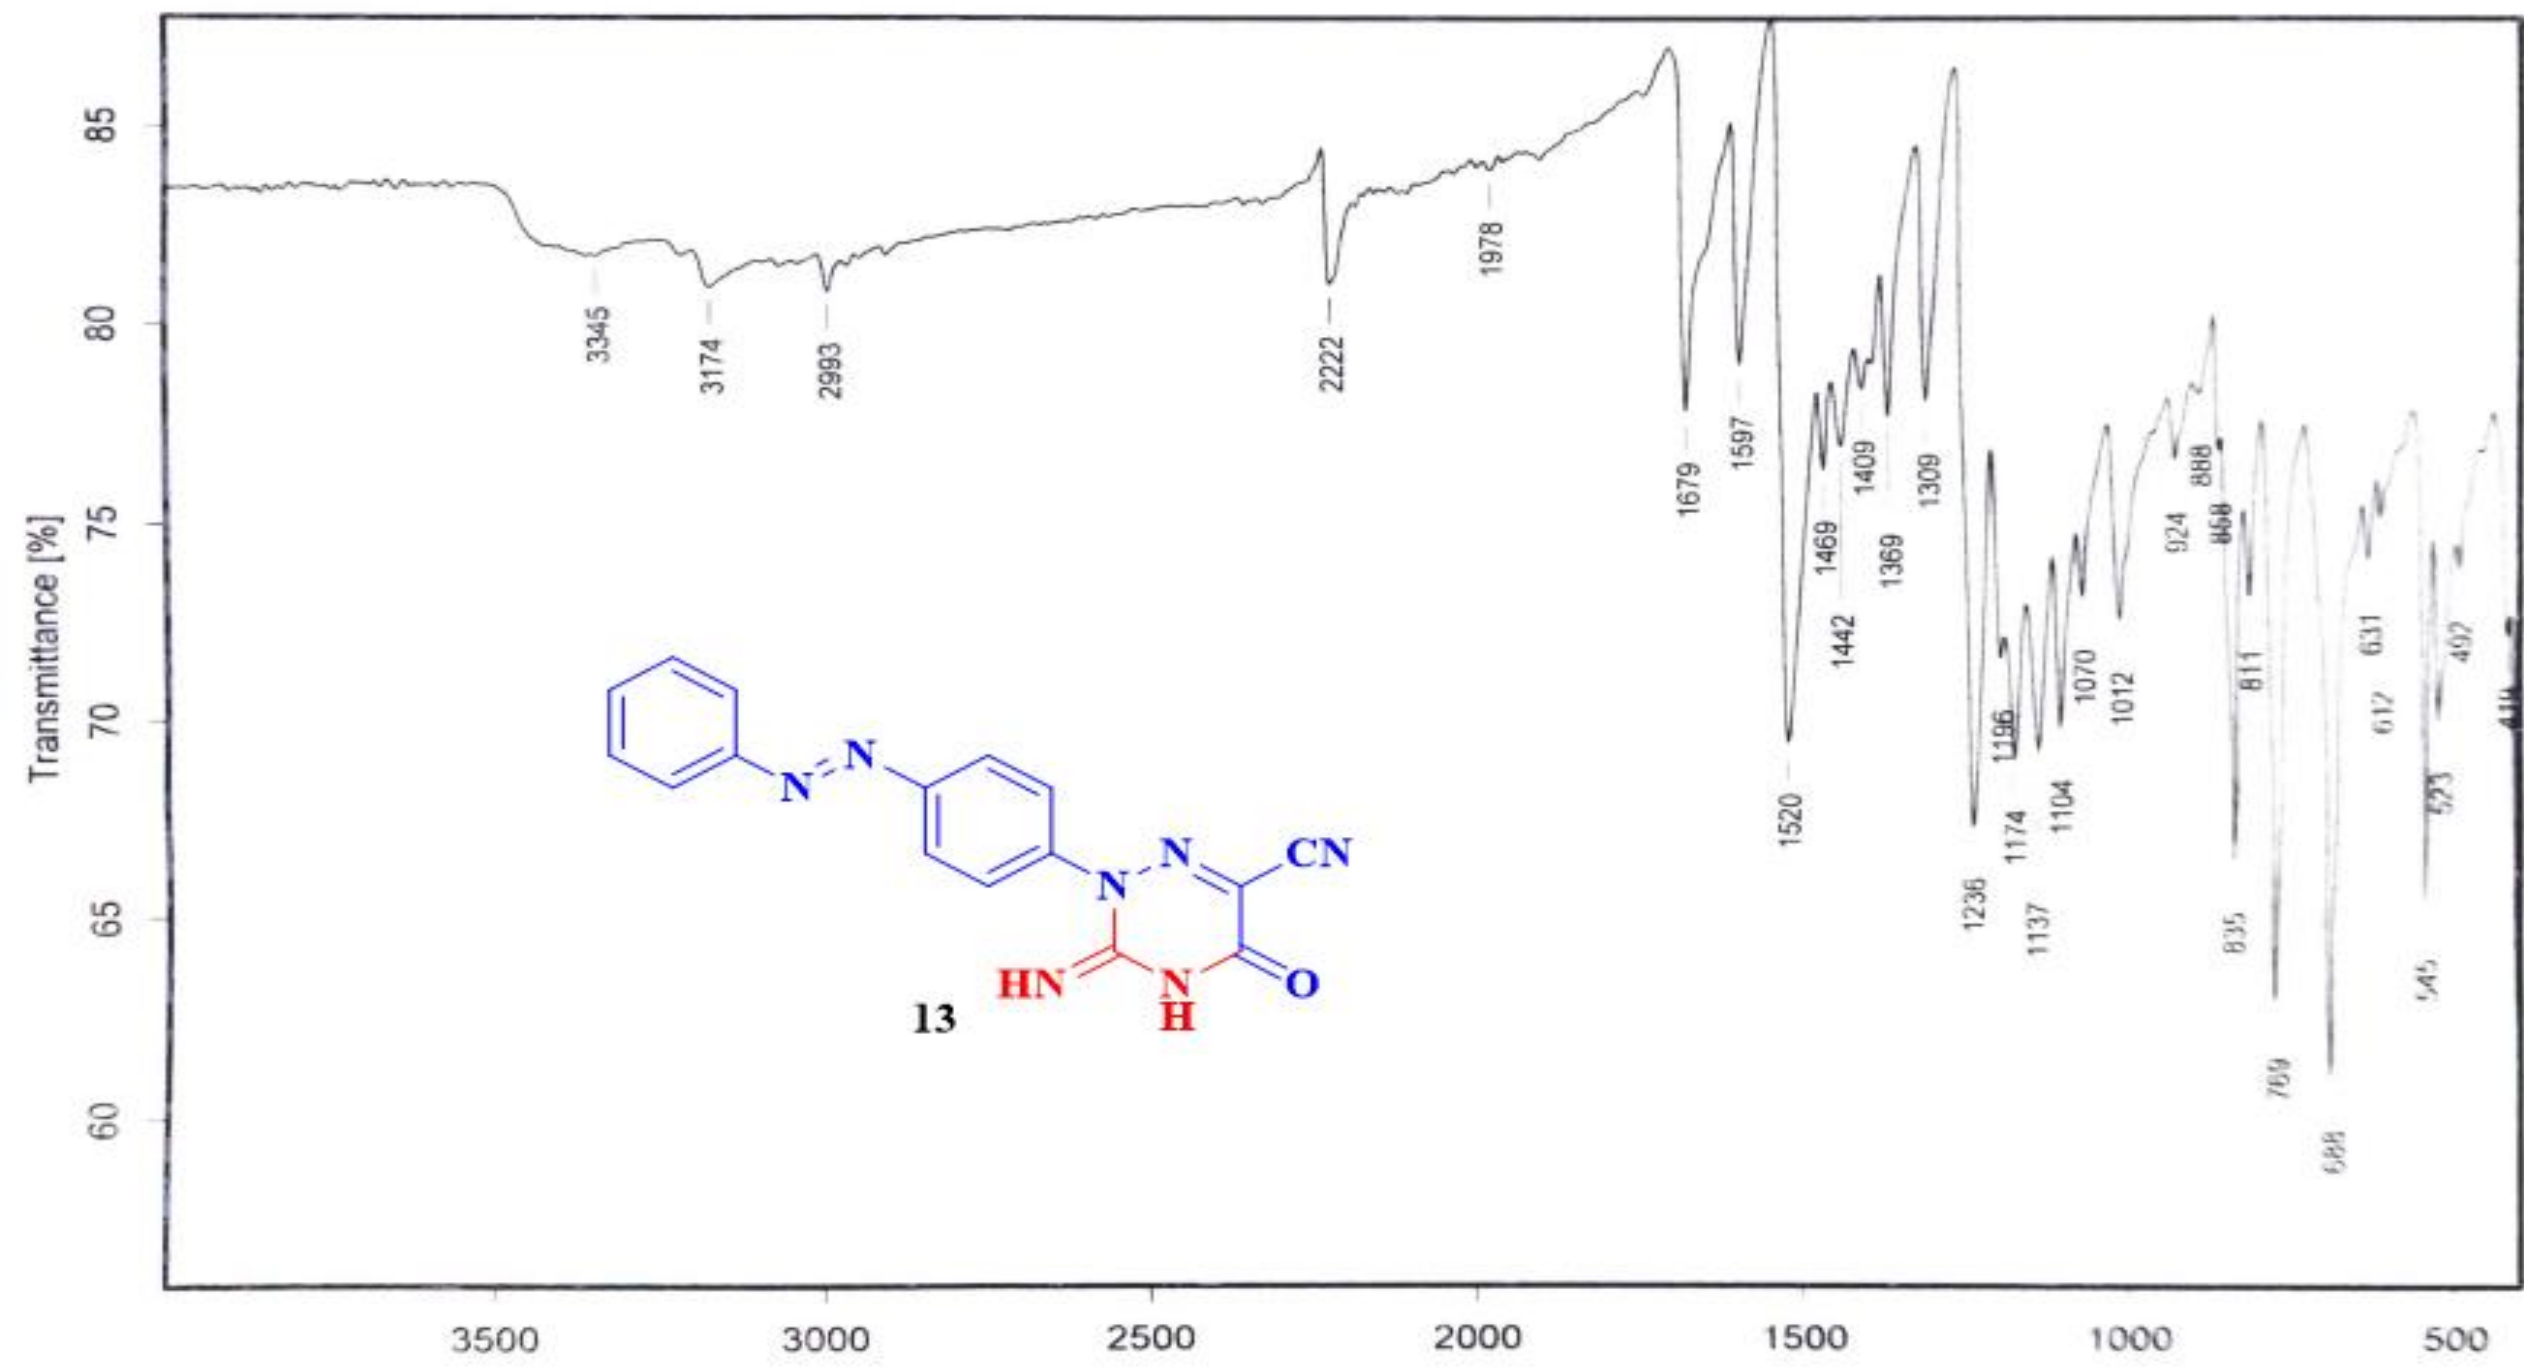

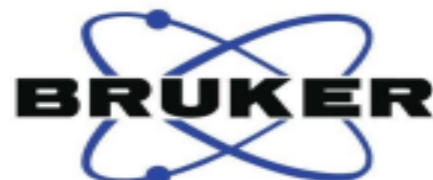

Current Data Parameters  
NAME       nour eldin-PA29  
EXPNO       1  
PROCNO      1

F2 - Acquisition Parameters  
Date\_       20230313  
Time        15.39  
INSTRUM     spect  
PROBHD      5 mm PABBO BB/  
PULPROG     zg30  
TD           65536  
SOLVENT     DMSO  
NS           112  
DS           2  
SWH          8012.820 Hz  
FIDRES       0.122266 Hz  
AQ           4.0894465 sec  
RG           31.47  
DW           62.400 usec  
DE           6.50 usec  
TE           300.0 K  
D1           1.00000000 sec  
TDO          1

----- CHANNEL f1 -----  
SFO1        400.1524711 MHz  
NUC1        1H  
P1           12.00 usec  
PLW1        18.00000000 W

F2 - Processing parameters  
SI           65536  
SF           400.1500000 MHz  
WDW         EM  
SSB         0  
LB           0.30 Hz  
GB         0  
PC           1.00

12.644  
8.064  
8.041  
8.000  
7.970  
7.948  
7.908  
7.883  
7.861  
7.840  
7.733  
7.711  
7.669  
7.647  
7.594  
7.574  
7.547  
7.531  
7.513  
7.492  
7.378  
7.356

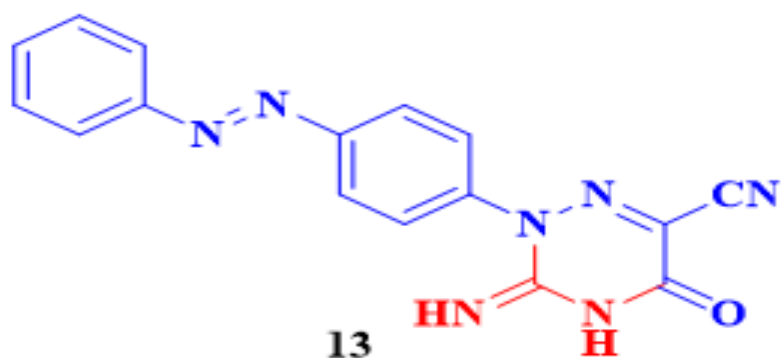

3.352  
2.507

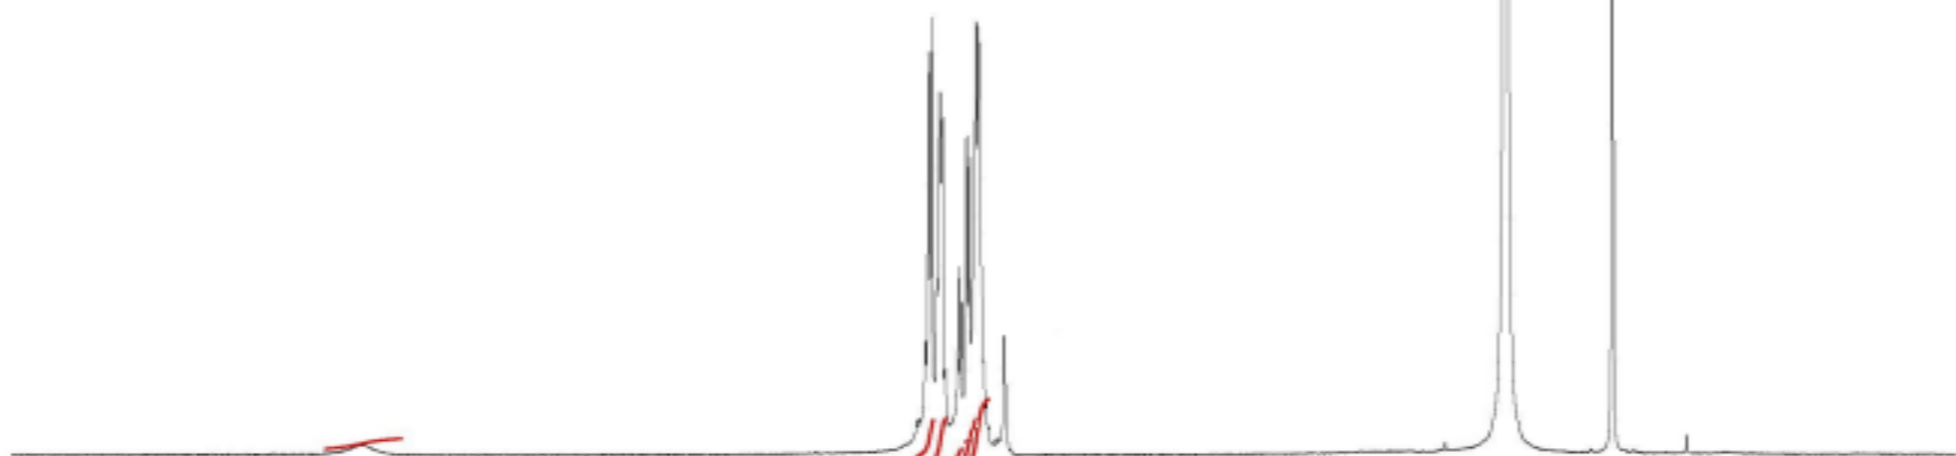

15 14 13 12 11 10 9 8 7 6 5 4 3 2 1 ppm

2.03

2.01  
2.08  
0.54  
2.03  
3.03

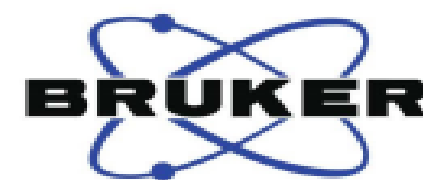

Current Data Parameters  
NAME: nour eldin-PA29  
EXPNO: 2  
PROCNO: 1

F2 - Acquisition Parameters  
Date\_: 20230314  
Time: 10.13  
INSTRUM: spect  
PROBHD: 5 mm PABBO BB/  
PULPROG: zgpg30  
TD: 65536  
SOLVENT: DMSO  
NS: 1500  
DS: 4  
SWH: 24038.461 Hz  
FIDRES: 0.366798 Hz  
AQ: 1.3631488 sec  
RG: 205.37  
DW: 20.800 usec  
DE: 6.50 usec  
TE: 300.0 K  
D1: 2.00000000 sec  
D11: 0.03000000 sec  
TDO: 1

----- CHANNEL f1 -----  
SFO1: 100.6278588 MHz  
NUC1: 13C  
P1: 10.00 usec  
PLW1: 47.00000000 W

----- CHANNEL f2 -----  
SFO2: 400.1516006 MHz  
NUC2: 1H  
CPDPRG[2]: waltz16  
PCPD2: 90.00 usec  
PLW2: 18.00000000 W  
PLW12: 0.34722000 W  
PLW13: 0.28125000 W

F2 - Processing parameters  
SI: 32768  
SF: 100.6177975 MHz  
WDW: EM  
SSB: 0  
LB: 1.00 Hz  
GB: 0  
PC: 1.40

161.30  
160.72  
152.51  
149.08  
145.42  
143.97  
131.81  
131.66  
129.89  
124.69  
122.95  
122.88  
117.30  
117.22  
111.93  
105.74

40.61  
40.40  
40.19  
39.98  
39.77  
39.56  
39.36

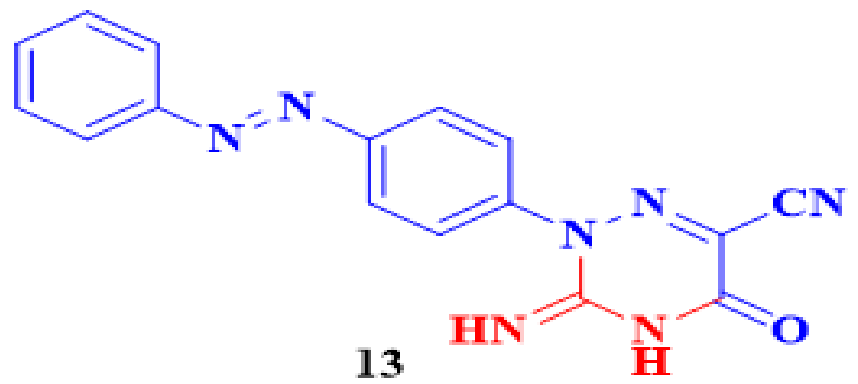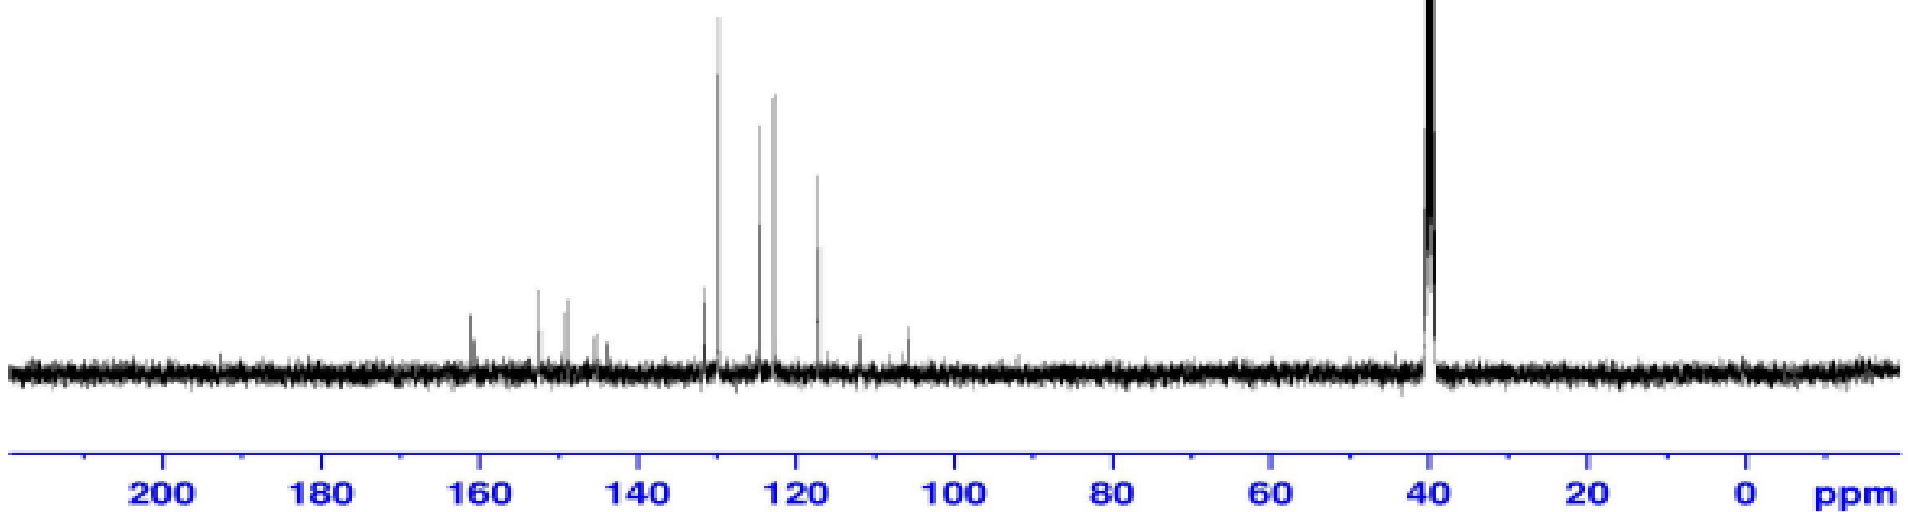

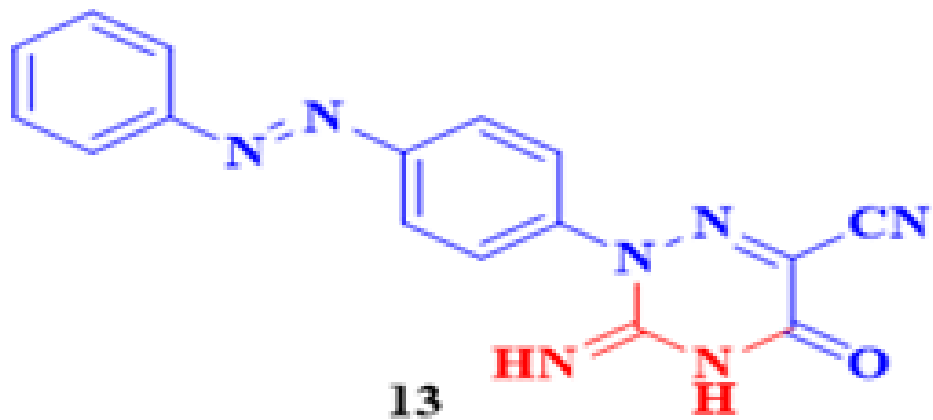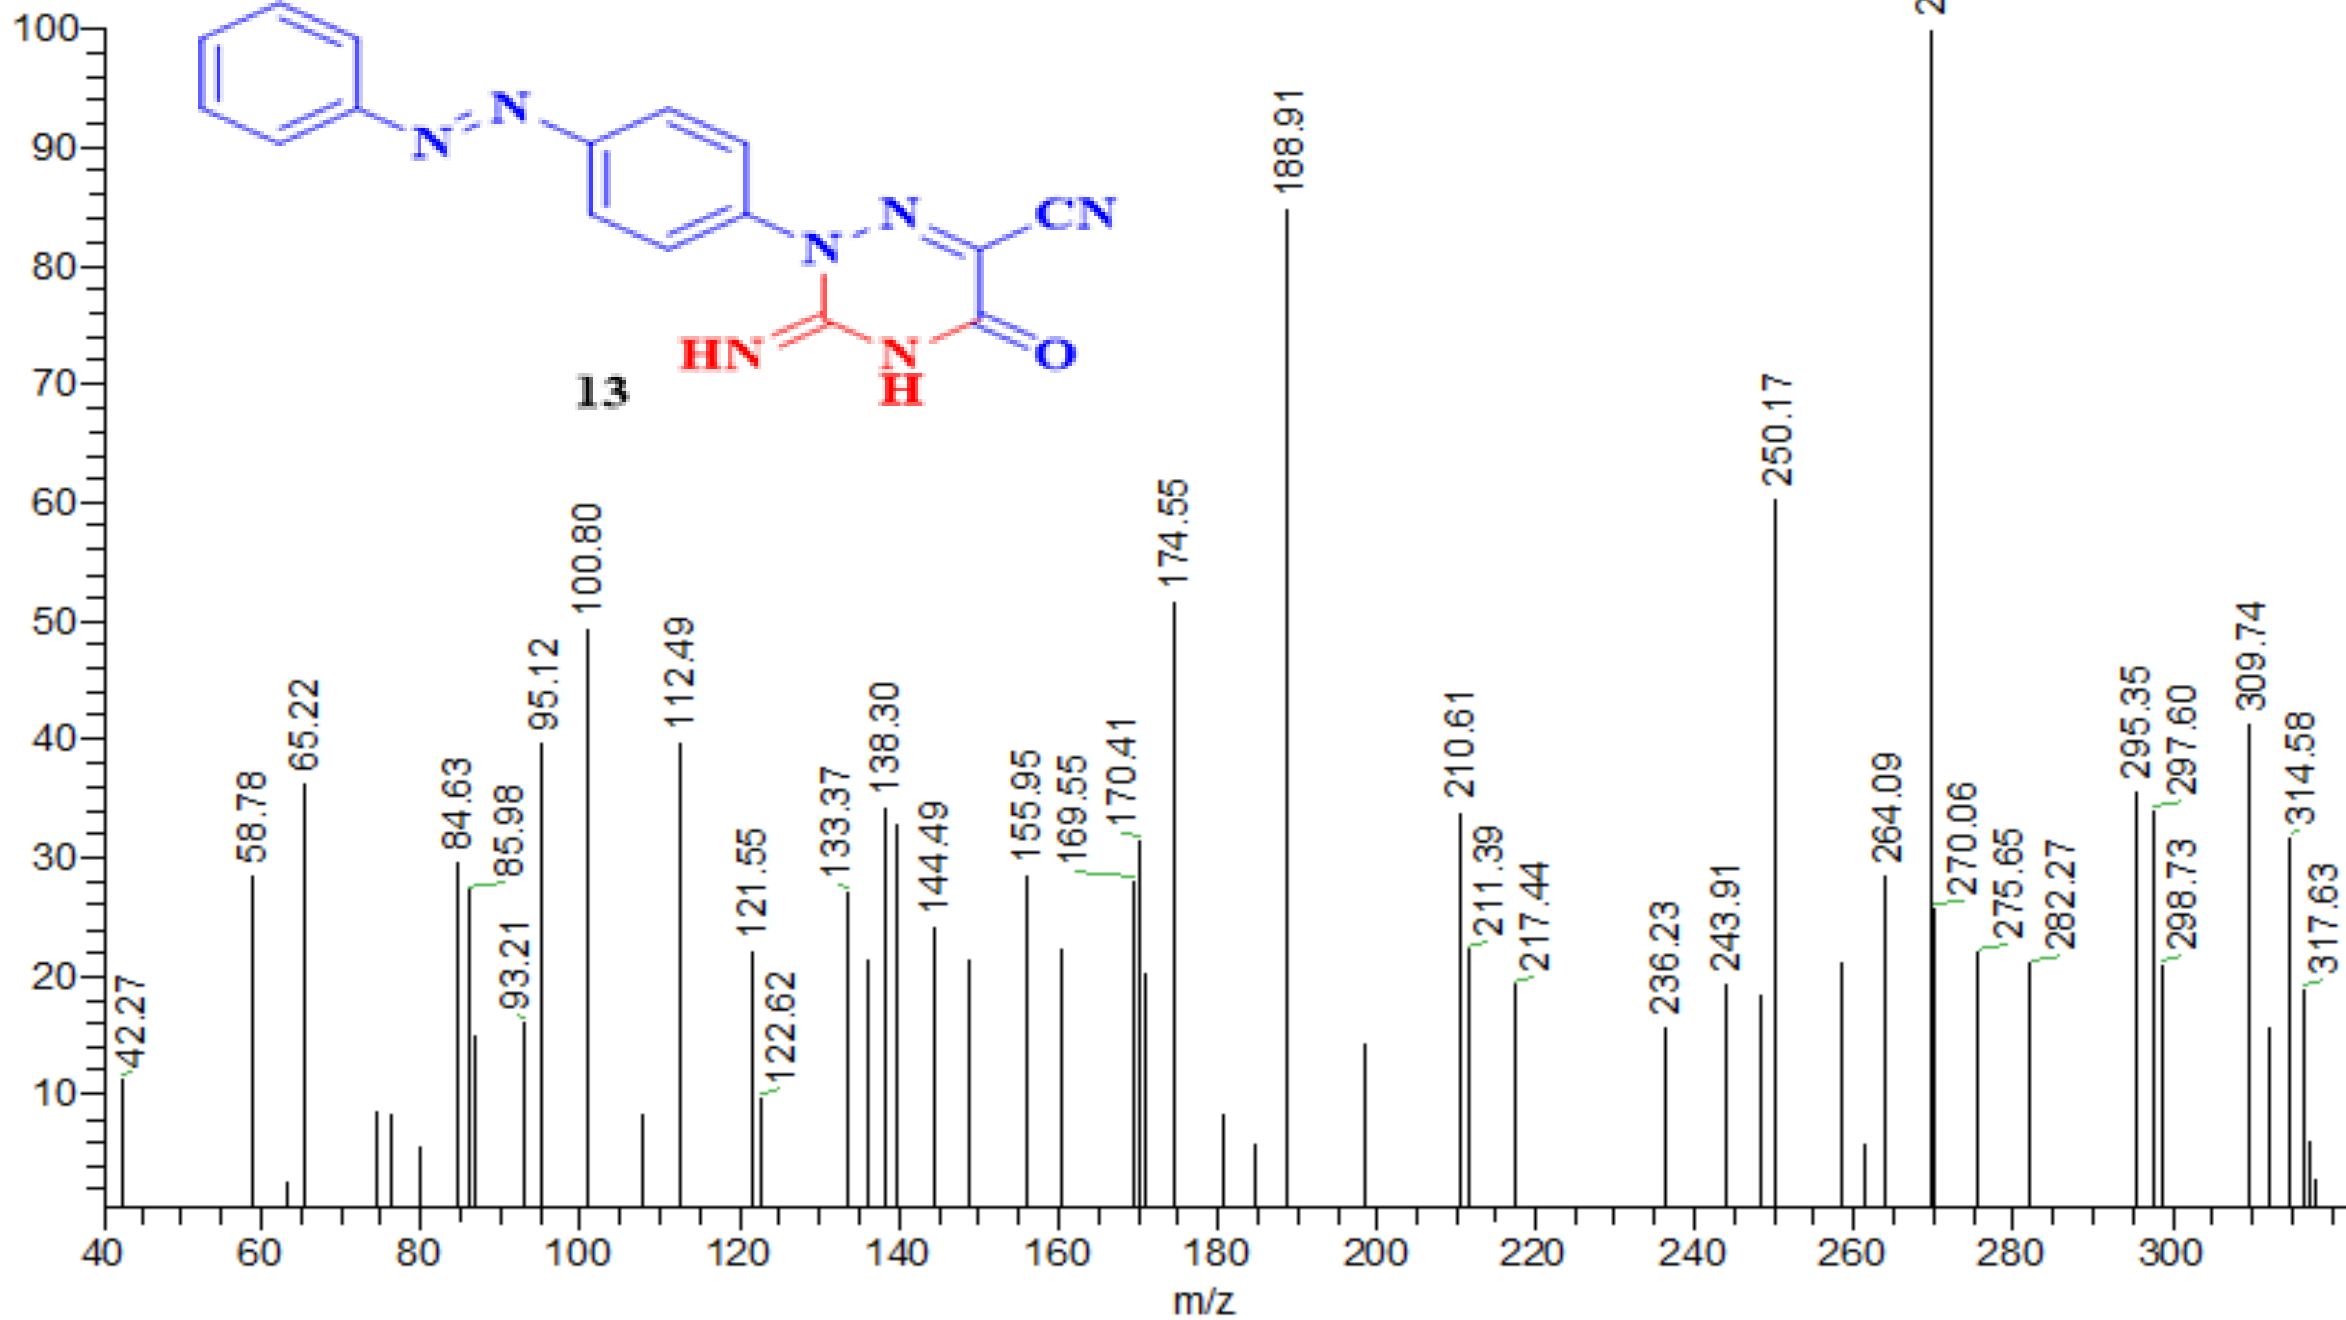

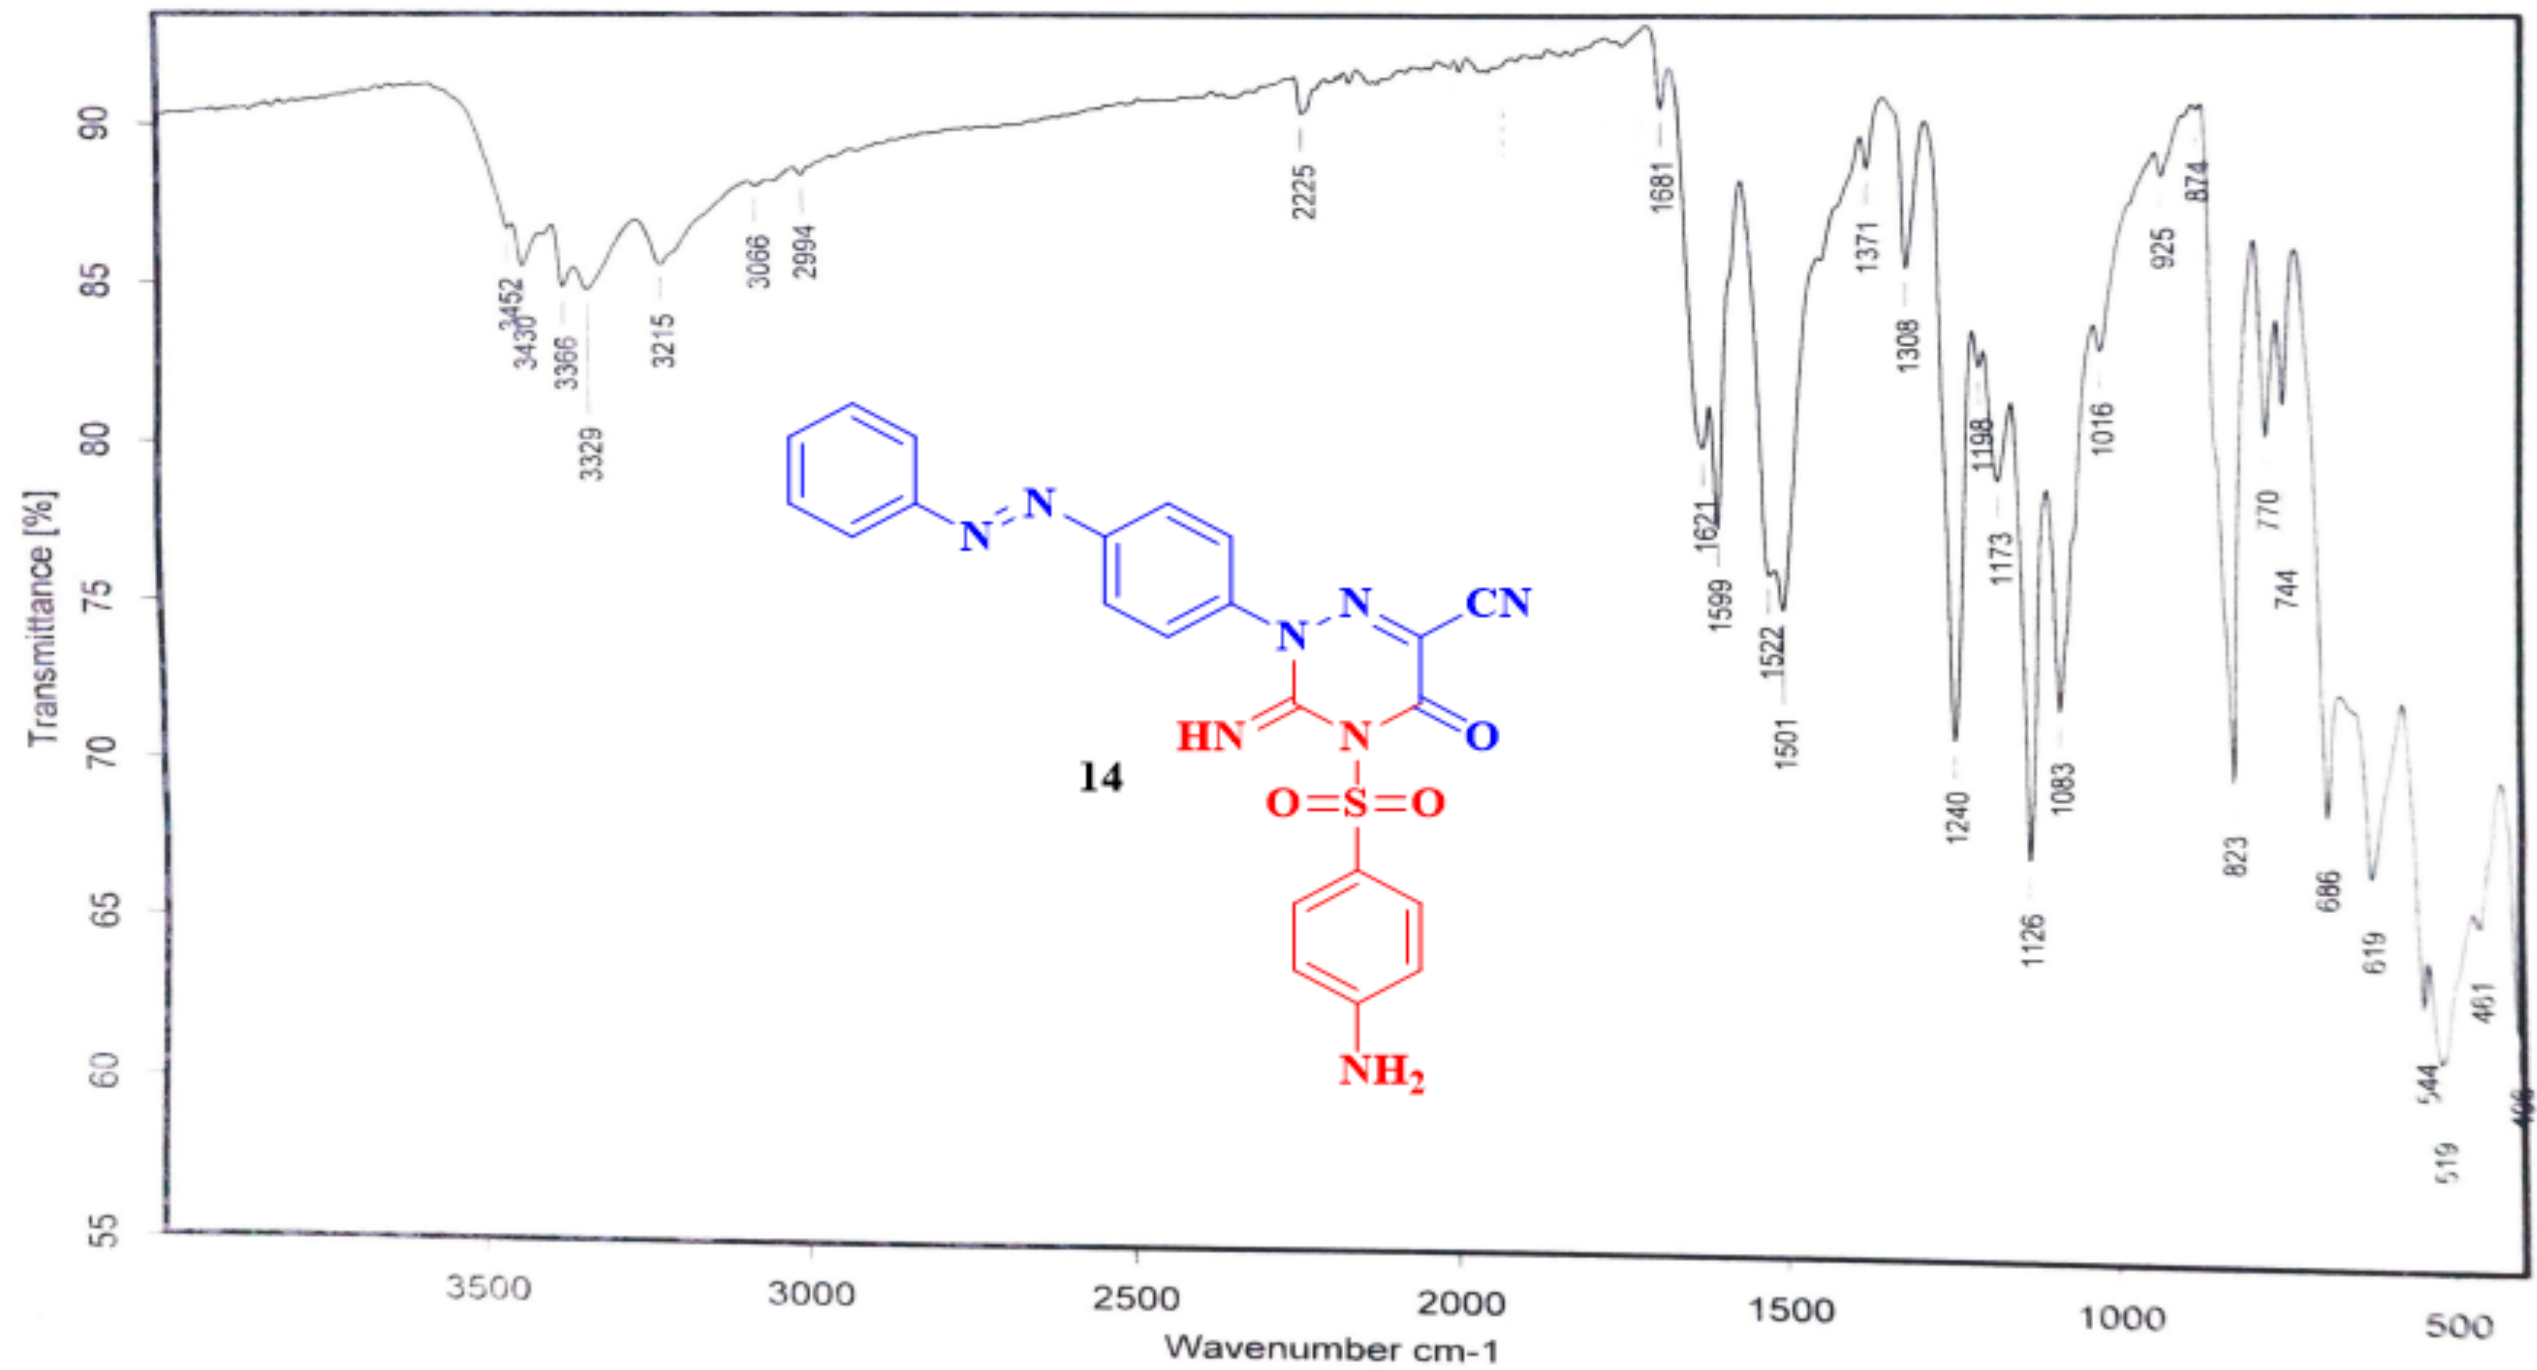

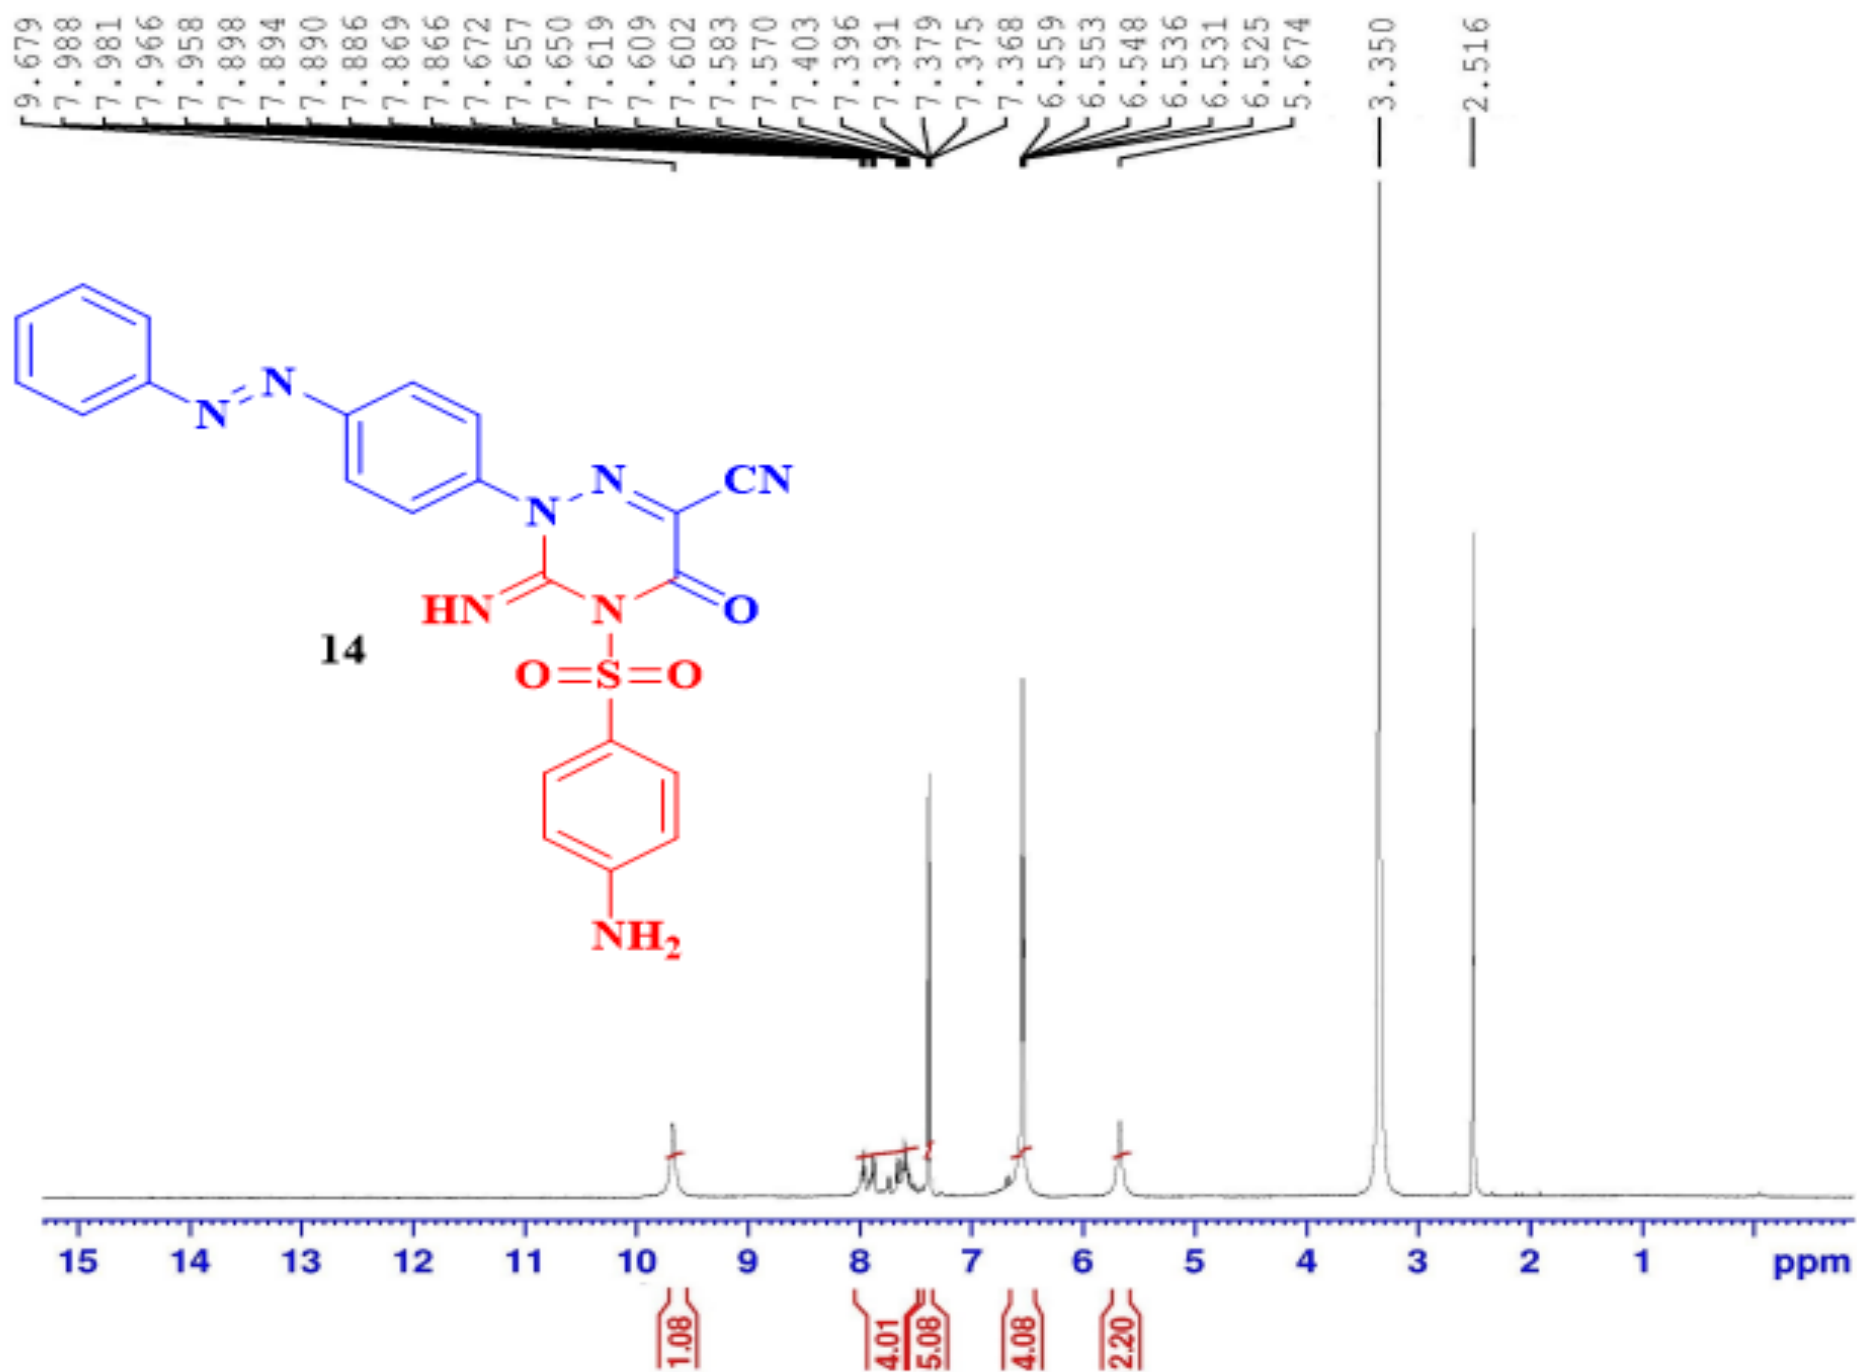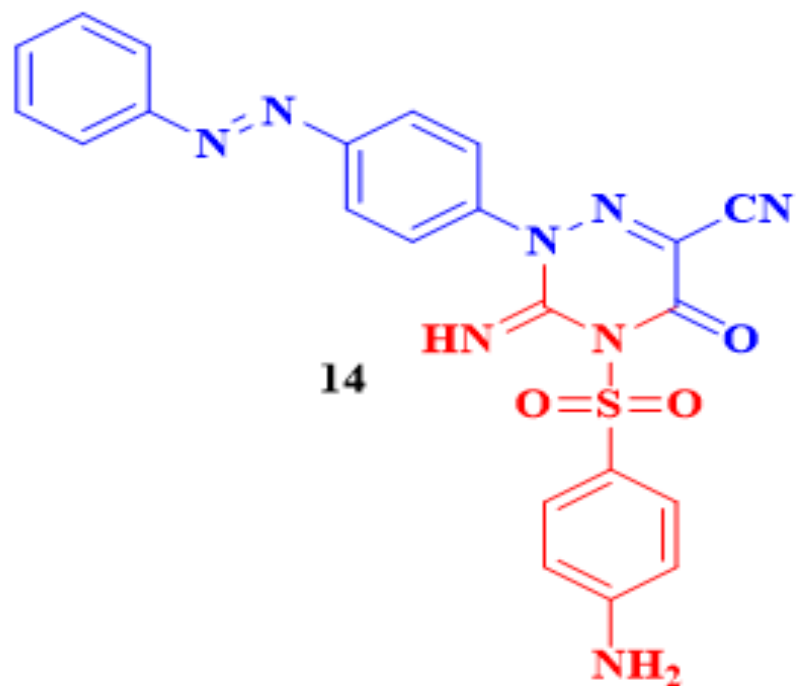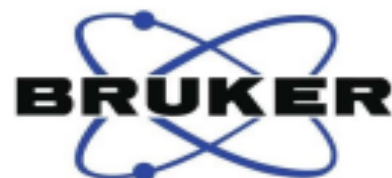

Current Data Parameters  
 NAME nour eldin-PA30  
 EXPNO 2  
 PROCNO 1

F2 - Acquisition Parameters  
 Date\_ 20230313  
 Time 17.16  
 INSTRUM spect  
 PROBHD 5 mm PABBO BB/  
 PULPROG zg30  
 ID 65536  
 SOLVENT DMSO  
 NS 106  
 DS 2  
 SWH 8012.820 Hz  
 FIDRES 0.122266 Hz  
 AQ 4.0894465 sec  
 RG 205.37  
 DW 62.400 usec  
 DE 6.50 usec  
 TE 300.0 K  
 D1 1.00000000 sec  
 TDO 1

----- CHANNEL f1 -----  
 SFO1 400.1524711 MHz  
 NUC1 1H  
 P1 12.00 usec  
 PLW1 18.00000000 W

F2 - Processing parameters  
 SI 65536  
 SF 400.1500000 MHz  
 WDW EM  
 SSB 0  
 LB 0.30 Hz  
 GB 0  
 PC 1.00

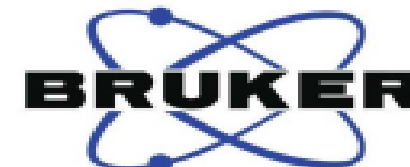

Current Data Parameters  
NAME nour eldin-PA30  
EXPNO 3  
PROCNO 1

F2 - Acquisition Parameters  
Date\_ 20230314  
Time 12.49  
INSTRUM spect  
PROBHD 5 mm PABBO BB/  
PULPROG zgpg30  
ID 65536  
SOLVENT DMSO  
NS 285  
DS 4  
SWH 24038.461 Hz  
FIDRES 0.366798 Hz  
AQ 1.3631468 sec  
RG 205.37  
DW 20.800 usec  
DE 6.50 usec  
TE 299.9 K  
D1 2.00000000 sec  
D11 0.03000000 sec  
TD0 1

----- CHANNEL f1 -----  
SFO1 100.6278588 MHz  
NUC1 13C  
P1 10.00 usec  
PLW1 47.00000000 W

----- CHANNEL f2 -----  
SFO2 400.1516006 MHz  
NUC2 1H  
CPDPRG[2] waltz16  
PCPD2 90.00 usec  
PLW2 18.00000000 W  
PLW12 0.34722000 W  
PLW13 0.28125000 W

F2 - Processing parameters  
SI 32768  
SF 100.6177975 MHz  
WDW EM  
SSB 0  
LB 1.00 Hz  
GB 0  
PC 1.40

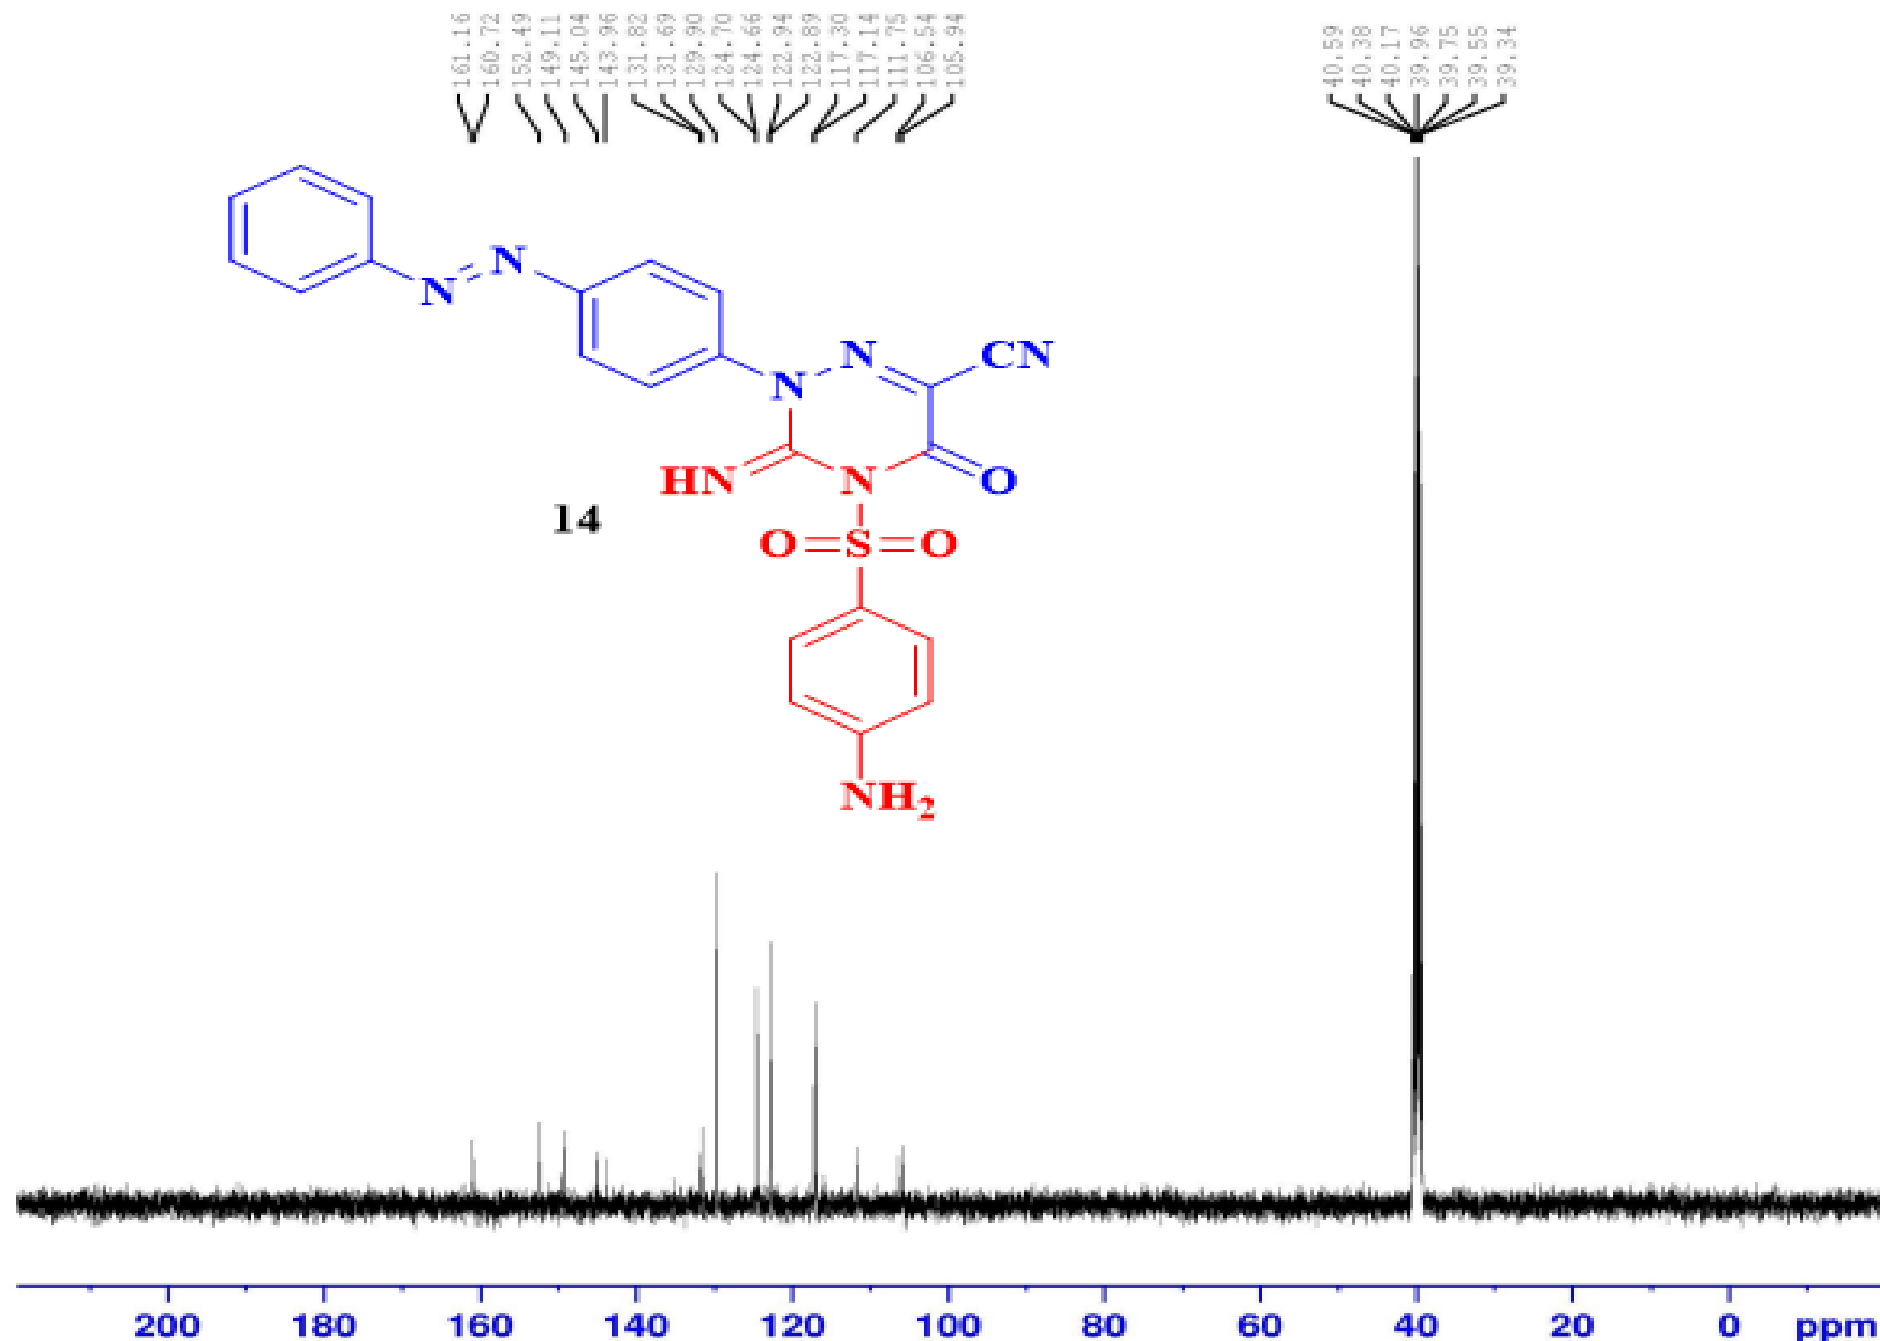



kerles-PA30 #204 RT: 3.43 AV: 1 SB: 26 1.21-1.34, 0.87-1.14 NL: 5.41E3

T: {0,0} + c EI Full ms [40.00-1000.00]

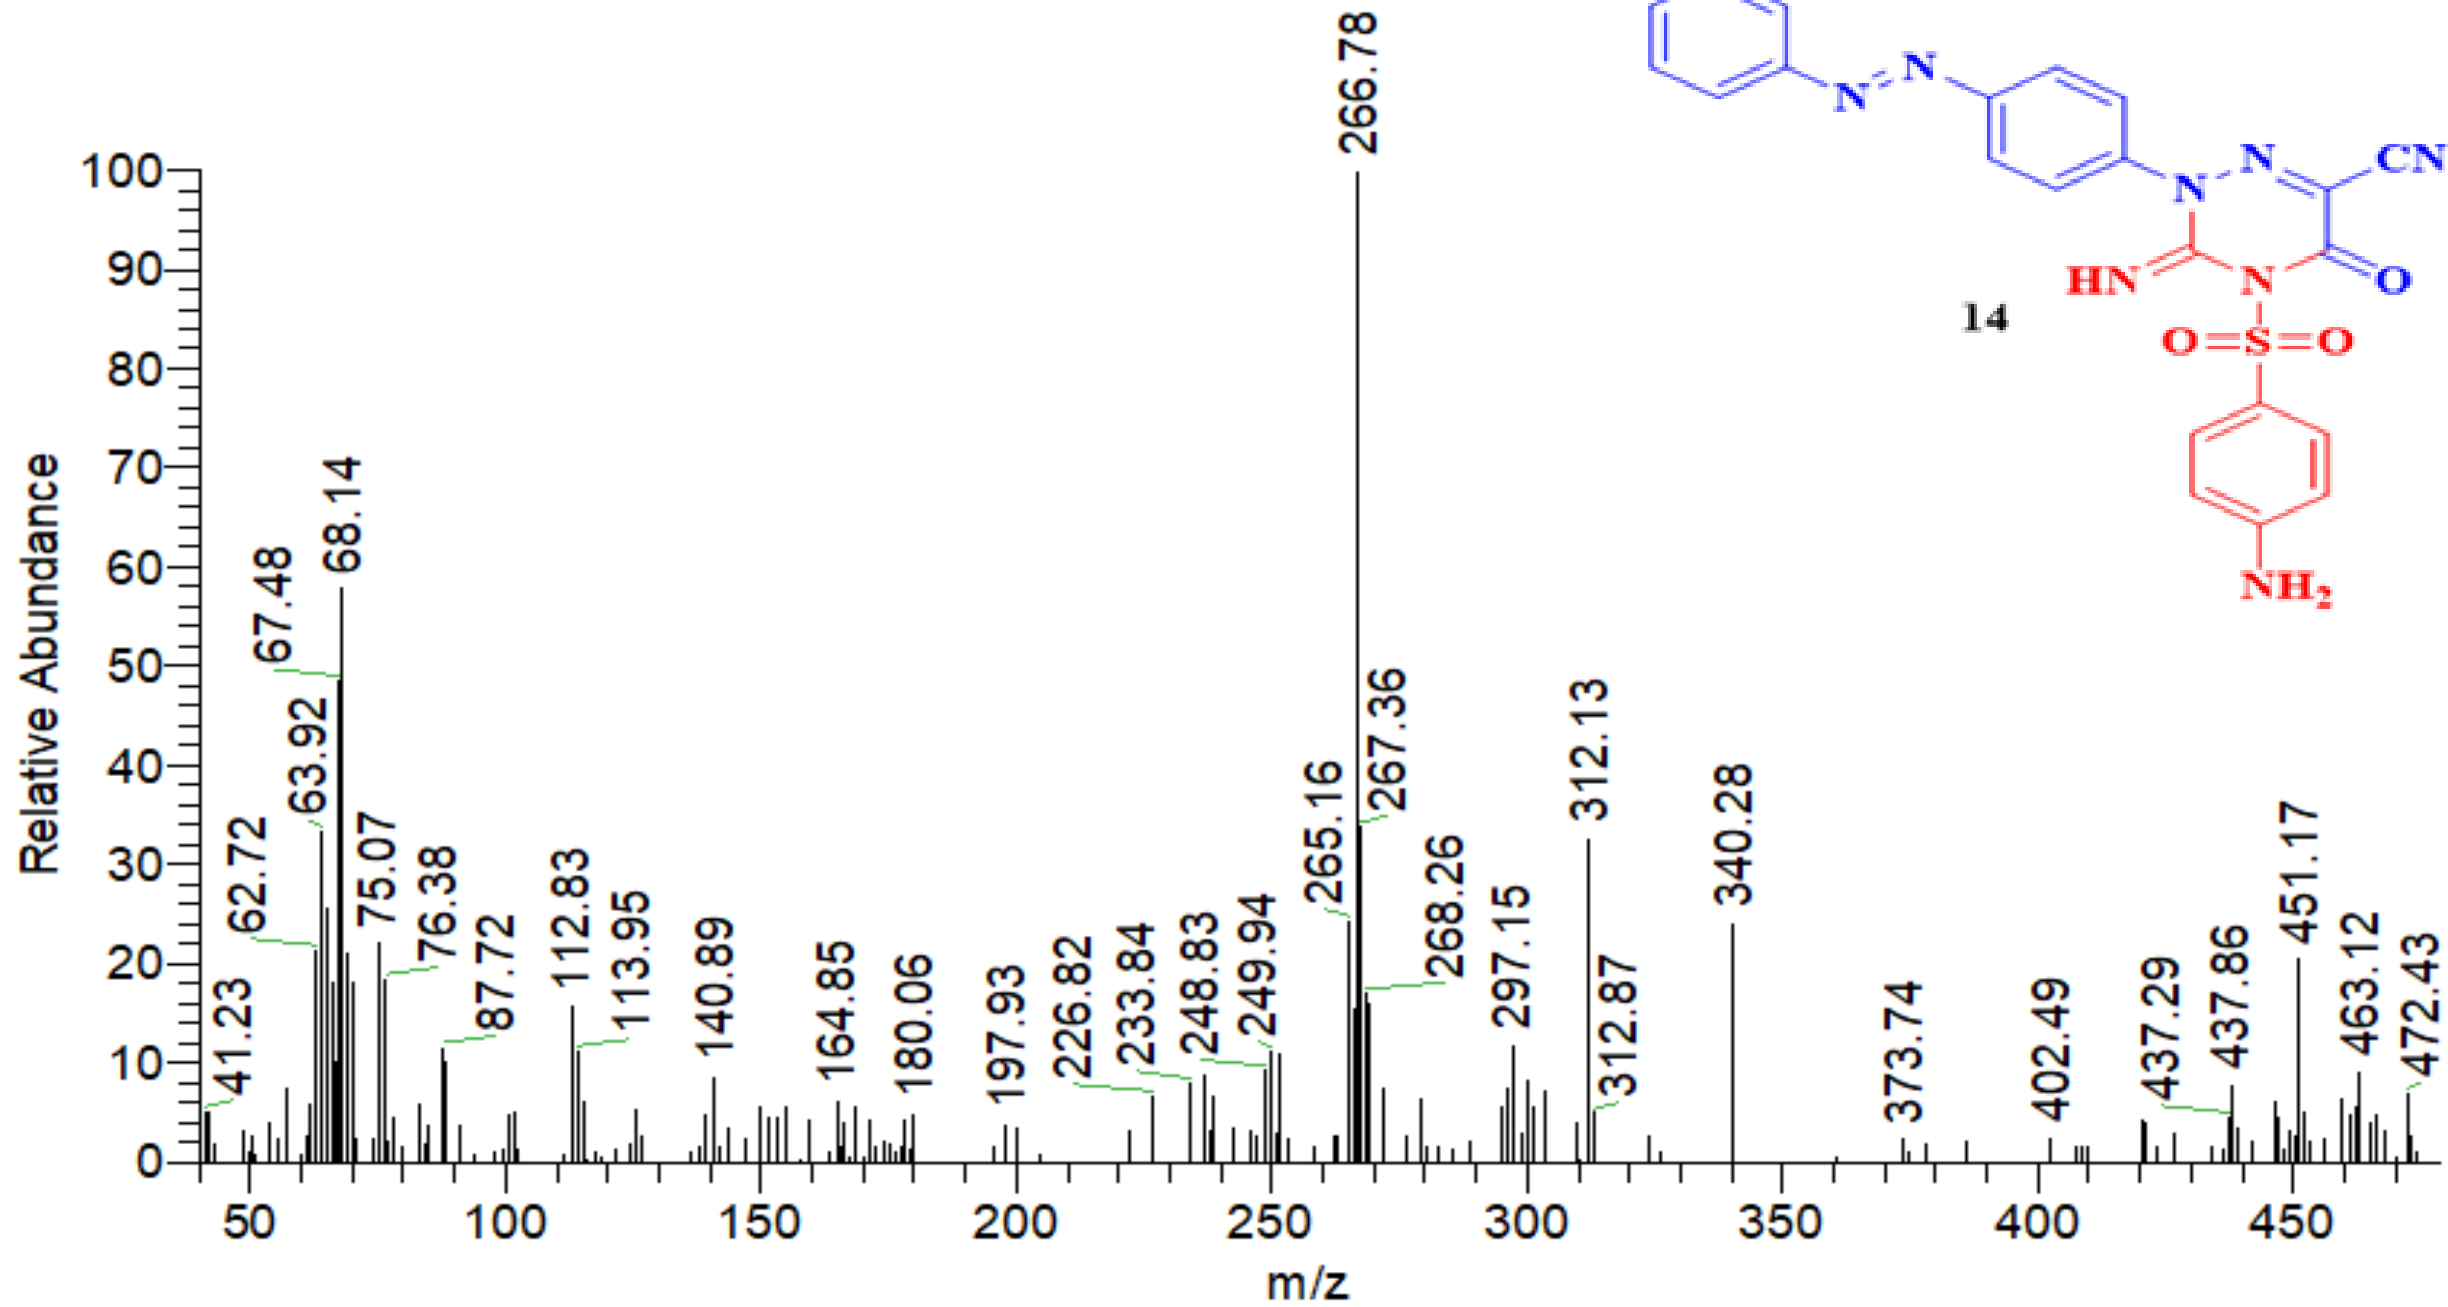

Supplement: d3ra06614b1.pdf [file d3ra06614b1.pdf]
